# Supplementary material for: Preferences for healthcare services among hypertension patients in China: a discrete choice experiment
Source: PubMed Central journal article supplement — BMJ Open. 2021 Dec 6;11(12):e053270. doi: 10.1136/bmjopen-2021-053270 (PMC8655589; doi:10.1136/bmjopen-2021-053270), 2021-12-06
Supplement: bmjopen-2021-053270.draft_revisions.pdf [file bmjopen-2021-053270.draft_revisions.pdf]

# BMJ Open

BMJ Open is committed to open peer review. As part of this commitment we make the peer review history of every article we publish publicly available.

When an article is published we post the peer reviewers' comments and the authors' responses online. We also post the versions of the paper that were used during peer review. These are the versions that the peer review comments apply to.

The versions of the paper that follow are the versions that were submitted during the peer review process. They are not the versions of record or the final published versions. They should not be cited or distributed as the published version of this manuscript.

BMJ Open is an open access journal and the full, final, typeset and author-corrected version of record of the manuscript is available on our site with no access controls, subscription charges or pay-per-view fees (<http://bmjopen.bmj.com>).

If you have any questions on BMJ Open's open peer review process please email [info.bmjopen@bmj.com](mailto:info.bmjopen@bmj.com)

# BMJ Open

## Preferences for healthcare services among hypertension patients in China: a discrete choice experiment

|                               |                                                                                                                                                                                                                                                                                                                                                                                                                                                                                                                                                                                                      |
|-------------------------------|------------------------------------------------------------------------------------------------------------------------------------------------------------------------------------------------------------------------------------------------------------------------------------------------------------------------------------------------------------------------------------------------------------------------------------------------------------------------------------------------------------------------------------------------------------------------------------------------------|
| Journal:                      | <i>BMJ Open</i>                                                                                                                                                                                                                                                                                                                                                                                                                                                                                                                                                                                      |
| Manuscript ID                 | bmjopen-2021-053270                                                                                                                                                                                                                                                                                                                                                                                                                                                                                                                                                                                  |
| Article Type:                 | Original research                                                                                                                                                                                                                                                                                                                                                                                                                                                                                                                                                                                    |
| Date Submitted by the Author: | 08-May-2021                                                                                                                                                                                                                                                                                                                                                                                                                                                                                                                                                                                          |
| Complete List of Authors:     | Yu, Xiaolan; Nantong University Medical School, Department of Medical Informatics<br>Bao, Haini; Nantong University Medical School, Department of Medical Informatics<br>Shi, Jianwei; Shanghai Jiao Tong University School of Medicine, School of Public Health<br>Yuan, Xiaoyu; Affiliated Hospital of Nantong University, Department of Emergency Medicine<br>Qian, Liangliang; Pujiang Community Health Service Center<br>Feng, Zhe; Nantong University Medical School, Department of Medical Informatics<br>Geng, JinSong; Nantong University Medical School, Department of Medical Informatics |
| Keywords:                     | Health policy < HEALTH SERVICES ADMINISTRATION & MANAGEMENT, HEALTH SERVICES ADMINISTRATION & MANAGEMENT, PUBLIC HEALTH, Hypertension < CARDIOLOGY                                                                                                                                                                                                                                                                                                                                                                                                                                                   |
|                               |                                                                                                                                                                                                                                                                                                                                                                                                                                                                                                                                                                                                      |

SCHOLARONE™  
Manuscripts

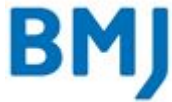

I, the Submitting Author has the right to grant and does grant on behalf of all authors of the Work (as defined in the below author licence), an exclusive licence and/or a non-exclusive licence for contributions from authors who are: i) UK Crown employees; ii) where BMJ has agreed a CC-BY licence shall apply, and/or iii) in accordance with the terms applicable for US Federal Government officers or employees acting as part of their official duties; on a worldwide, perpetual, irrevocable, royalty-free basis to BMJ Publishing Group Ltd ("BMJ") its licensees and where the relevant Journal is co-owned by BMJ to the co-owners of the Journal, to publish the Work in this journal and any other BMJ products and to exploit all rights, as set out in our [licence](#).

The Submitting Author accepts and understands that any supply made under these terms is made by BMJ to the Submitting Author unless you are acting as an employee on behalf of your employer or a postgraduate student of an affiliated institution which is paying any applicable article publishing charge ("APC") for Open Access articles. Where the Submitting Author wishes to make the Work available on an Open Access basis (and intends to pay the relevant APC), the terms of reuse of such Open Access shall be governed by a Creative Commons licence – details of these licences and which [Creative Commons](#) licence will apply to this Work are set out in our licence referred to above.

Other than as permitted in any relevant BMJ Author's Self Archiving Policies, I confirm this Work has not been accepted for publication elsewhere, is not being considered for publication elsewhere and does not duplicate material already published. I confirm all authors consent to publication of this Work and authorise the granting of this licence.

# Preferences for healthcare services among hypertension patients in China: a discrete choice experiment

Xiaolan Yu<sup>1†</sup>, Haini Bao<sup>1†</sup>, Jianwei Shi<sup>2</sup>, Xiaoyu Yuan<sup>3</sup>, Liangliang Qian<sup>4</sup>, Zhe Feng<sup>1</sup>, Jinsong Geng<sup>1\*</sup>

<sup>1</sup> Department of Medical Informatics, Nantong University Medical School, Nantong, China

<sup>2</sup> School of Public Health, Shanghai Jiaotong University School of Medicine, Shanghai, China

<sup>3</sup> Department of Emergency Medicine, Affiliated Hospital of Nantong University, Nantong, China

<sup>4</sup> Pujiang Community Health Service Center, Shanghai, China

\*Correspondence: Jinsong Geng, Department of Medical Informatics, Nantong University Medical School, 19 Qixiu Road, Nantong, Jiangsu 226001, China; Email [gjs@ntu.edu.cn](mailto:gjs@ntu.edu.cn); Tel: +86 513 85051891; Fax: +86 513 85051876

<sup>†</sup>Xiaolan Yu and Haini Bao contributed equally to the research and should be considered as co-first authors.

Word count: 4203

## ABSTRACT

### Objectives

Our study aimed to support evidence-informed policy-making on patient-centered care by investigating preferences for healthcare services among hypertension patients.

### Design

We identified six attributes of healthcare services for a discrete choice experiment (DCE), and applied Bayesian-efficient design with blocking techniques to generate choice sets. After conducting the DCE, we used a mixed logit regression model to investigate patients' preferences for each attribute and analyzed the heterogeneities in preferences. Estimates of willingness to pay were derived from regression coefficients.

### Setting

The DCE was conducted in Jiangsu province and Shanghai municipality in China.

### Participants

Patients aged 18 years or older with a history of hypertension for at least two years and who took medications regularly were recruited.

### Results

Patients highly valued healthcare services that produced good treatment effects ( $\beta=4.502$ ,  $p<0.05$ ), followed by travel time to healthcare facilities within 1 hour ( $\beta=1.285$ ,  $p<0.001$ ), and the effective physician-patient communication ( $\beta=0.771$ ,  $p<0.001$ ). Continuity of care and minimal waiting time were also positive predictors ( $p<0.001$ ). However, the out-of-pocket cost was a negative predictor of patients' choice ( $\beta= -0.168$ ,  $p<0.001$ ). Older adults, patients with good health-related quality of life, had comorbidities, and who were likely to visit secondary and tertiary hospitals cared more about favorable effects ( $p<0.05$ ). Patients were willing to pay CNY 2,489 (95% CI 2,013-2,965) as long as the clinical benefits gained were substantial.

### Conclusions

Our findings highlight the importance of effective, convenient, efficient, coordinated, and patient-centered care for chronic diseases like hypertension. Policymakers and healthcare providers are suggested to work on aligning the service provision with patients' preferences.

**Keywords:** patients' preferences, healthcare services, discrete choice experiment, hypertension

## Strengths and limitations of this study

- Our study provides valuable information regarding patients' preferences for healthcare services in China.
- The in-depth understanding of patients' preferences will inform policymakers to bridge the gap between the optimal models for patient-centered service delivery and patients' healthcare needs.
- The discrete choice experiment is a rigorous method that enables us to measure patients' preferences.
- Comorbidities, past healthcare experience, and health-related quality of life were used as variables of preference heterogeneity to address the evidence gap.
- While this study explored the preferences among hypertension patients, future studies need to examine other types of chronic diseases.

## INTRODUCTION

Hypertension, also known as high blood pressure, is a condition in which the blood vessels have raised pressure persistently. Hypertension can damage the brain, heart, kidney, and arterial blood vessels. It is ranked as the leading cause of cardiovascular disease and premature death worldwide.<sup>1</sup> The prevalence of hypertension is high and continues to be rising in China in recent years. Among Chinese adults aged over 15 years, 18.14% have hypertension.<sup>2</sup> Despite huge efforts, the awareness, treatment, and control rate of hypertension remained extremely low, which were associated with substantial unnecessary disease burden and significant excess mortality.<sup>3-5</sup> Moreover, many hypertension patients have multiple comorbidities, which is associated with increased utilization of healthcare services and great financial burden to individuals and the health system.<sup>6,7</sup>

To optimize the allocation of healthcare resources and reach the goal of delivering high-standard healthcare services, since 2009, the Chinese government has vigorously promoted the implementation of the hierarchical medical system. Primary healthcare facilities like community health service centers are expected to offer affordable first-contact care, while secondary and tertiary healthcare facilities provide specialist referral services. In the past decade, advances have been made by the Chinese government in achieving universal health coverage and providing financial protection for its citizens.<sup>8</sup> However, primary healthcare was underutilized, and the referral system was still practiced with poor effectiveness.<sup>9</sup>

Many patients would like to get healthcare services directly from specialists in tertiary hospitals. In 2019, there were 3842.4 billion patient visits to hospitals in China, 53.53% of which were visits to tertiary hospitals.<sup>10</sup> A study showed that only 21.95% of outpatients from tertiary hospitals were willing to choose a general practitioner in a primary care setting as their first-contact physician.<sup>11</sup> Likewise, 50.27% of respondents in a survey never heard of general practitioners.<sup>12</sup> Moreover, individuals with better socioeconomic status and greater healthcare needs seemed to

1  
2  
3  
4 be less likely to utilize primary healthcare.<sup>13</sup>  
5

6 Understanding patients' preferences are particularly worthwhile when patient  
7 decisions are preference-sensitive, like the choice in healthcare services. Eliciting  
8 patients' preferences is a key element of patient-centered care. Discrete choice  
9 experiment (DCE) is a well-established quantitative approach to elicit stated  
10 preferences. Despite several DCEs<sup>14-22</sup> were carried out to investigate public  
11 preferences for healthcare services, none of them involved patients with hypertension,  
12 one of the most common types of chronic diseases.  
13  
14  
15  
16  
17  
18  
19

20 Although patient-reported outcomes, such as health-related quality of life  
21 (HRQoL) are essential measures of health status, whether patients' preferences on  
22 healthcare services differ from HRQoL remain unclear. Furthermore, preferences  
23 contain a learned component, and past experience might influence an individual's  
24 current choice.<sup>23 24</sup> We remain unclear about whether the healthcare facilities that  
25 patients usually visited in the past could have an impact on their current preferences  
26 for healthcare services.  
27  
28  
29  
30  
31  
32  
33  
34

35 We aim to fill the gap by measuring preferences of healthcare services for  
36 first-contact care among hypertension patients, thus supporting evidence-informed  
37 policy-making to address the problems of inappropriate healthcare service utilization.  
38 Specifically, we conducted a DCE to test the following hypotheses: (1) attributes  
39 regarding health benefits are more important than other attributes for patients'  
40 preferences for healthcare services; (2) patients' preferences differ by  
41 socio-demographic characteristics, feelings of health status (i.e. HRQoL), the severity  
42 of disease (i.e. comorbidities), and the prior experience of healthcare services.  
43  
44  
45  
46  
47  
48  
49  
50

## 51 **METHODS**

### 52 **Identification of attributes and levels**

53  
54  
55 Our DCE design, implementation, and analysis followed the user guide jointly  
56 developed by the World Bank, World Health Organization, and the U.S. Agency for  
57  
58  
59  
60



1  
2  
3  
4 International Development.<sup>25</sup> First, a literature review was conducted to identify  
5 attributes that were often used in DCEs regarding patients' preferences. We found that  
6 the most commonly mentioned dimensions were the service provision capabilities  
7 (skills and attitudes of medical staff, accessibility of medicines and medical  
8 equipment, environment), service efficiency (waiting time for admission or  
9 treatment), affordability (out-of-pocket costs for service delivery, consultation,  
10 examination or treatment), and convenience (travel time or distance from home to  
11 healthcare facilities).  
12  
13  
14  
15  
16  
17  
18  
19

20 Second, focus group discussions with physicians and hospital managers were  
21 carried out to determine the attributes and levels. According to their suggestions,  
22 although the expertise of healthcare professionals was found to be an important  
23 attribute for patients' preferences, benefits from healthcare were rarely considered.  
24 Moreover, continuity of healthcare is correlated with increased patient satisfaction  
25 and effective physician-patient communication is a central clinical function.<sup>26 27</sup>  
26 Therefore, we considered the above attributes in our research.  
27  
28  
29  
30  
31  
32  
33

34 Attributes and levels of healthcare services that were used in our DCE were  
35 shown in Table 1. Details of the explanation of attributes and levels were listed in  
36 Appendix 1. Our research objective was to identify the healthcare service attributes  
37 and levels that were preferred by hypertension patients, not the grade of hospitals (i.e.  
38 primary, secondary, tertiary). Hence, the scenarios in our DCE were not restricted to a  
39 specific grade of hospitals.  
40  
41  
42  
43  
44  
45  
46  
47  
48  
49  
50  
51  
52  
53  
54  
55  
56  
57  
58  
59  
60

**Table 1. Attributes and levels of healthcare services in the DCE**

| Domains       | Attributes                          | Levels                                      | Variables coding |
|---------------|-------------------------------------|---------------------------------------------|------------------|
| Capabilities  | Treatment effects                   | Good; Moderate; Poor                        | Categorical      |
|               | Physician-patient communication     | Good; Moderate; Poor                        | Categorical      |
|               | Continuity of care                  | Yes; No                                     | Categorical      |
| Efficiency    | Waiting time                        | Within 0.5 hour; 2 hours; 4 hours or longer | Categorical      |
| Affordability | Out-of-pocket costs (if reimbursed) | CNY 150 to 600                              | Continuous       |
| Convenience   | Travel time                         | Within 1 hour; 3 hours; 6 hours or longer   | Categorical      |

Note: The average exchange rate of US Dollars to Chinese Yuan (CNY) in 2020 was about 6.90. Therefore, CNY 150 was approximately US\$21.7 and CNY 600 was about US\$87.0.

## Experimental design and development of the questionnaire

We used Ngen1.2 software (Choice-Metrics, Sydney, Australia) to conduct the D-efficiency experimental design. After obtaining priors of the attributes and levels from the pilot, the Bayesian-efficient design was used to create the formal choice sets, which comprised 48 pairs of scenarios and were divided into six blocks, with eight pairs in each block. Blocking design boosted response efficiency by reducing the cognitive burden on respondents.<sup>28</sup>

We applied unlabeled DCE, which had been widely used to investigate public preferences for healthcare.<sup>15-17 19 20 22</sup> Respondents in unlabeled DCEs found that they were not subject to the psychological cues of the labels, thus reflecting the real-life choice.<sup>21 29</sup> Also, in our research, we did not investigate patients' preferences for specific types of healthcare facilities. Therefore, the unlabeled DCE was considered appropriate. When no option had a definitive advantage, it was assumed that an opt-out option could raise the probability of neutral responses, increasing the number of individuals that might choose the opt-out scenario.<sup>30-32</sup> While the forced-choice sets under preference uncertainty would favor options that were easier to justify and contributed to a lower likelihood of regret and error.<sup>33</sup> Consequently, forced-choice

sets were used in our DCE. Examples of choice scenarios were shown in Appendix 2.

The questionnaire included four parts. The first part consisted of patients' socio-demographic characteristics, past medical history, comorbidities, and healthcare experience (i.e. types of frequently visited healthcare facilities). The second part contained the DCE tasks. The third part was the items of EQ-5D-5L,<sup>34</sup> which used a health-state classification system defining health in five dimensions, mobility, self-care, usual activities, pain/discomfort, and anxiety/depression. Each of the five dimensions was classified into five levels of perceived problems, no problem, mild problems, moderate problems, severe problems, and unable to/extreme problems. The final part was the level of understanding and confidence when making the DCE choices. The score ranged from zero (worst case) to 10 (best case) (Appendix 3). We excluded the DCE questionnaires with an average score of less than eight.

## Sample size

There was no universal standard for the ideal sample size for DCEs.<sup>35</sup> A less efficient design might require a larger sample size, leading to increased costs.<sup>36</sup> We followed a rule-of-thumb<sup>37</sup> when determining sample size:

$$\frac{nta}{c} \geq 500$$

where n was the number of respondents, t was the number of tasks, a was the number of alternatives, and c was the largest number of levels for any attributes. We had six blocks of choice sets; as a result, the minimum sample size was 564.

## DCE implementation and data collection

Our formal DCE was carried out from November 1<sup>st</sup> to December 31<sup>st</sup>, 2020, in Jiangsu province and Shanghai municipality. Inclusion criteria were patients aged 18 years or older, with a history of hypertension for at least two years, and who took medications regularly. Hypertension patients during pregnancy were excluded. Patients were recruited consecutively from nine healthcare facilities.

1  
2  
3  
4 To ensure the validity and reliability of the survey, the DCE questionnaires were  
5 administrated through one-to-one, face-to-face interviews. Our interviewers consisted  
6 of eight medical interns and nine physicians. For quality assurance, we compiled a  
7 survey training manual and trained the interviewers before the experiment. The  
8 interviewers were required to check the completeness of each questionnaire  
9 immediately after it was completed. As long as any missing information, they had to  
10 ask patients to provide additional information. For patients who were illiterate or had  
11 blurred vision, the interviewers explained the meaning of the questionnaire item by  
12 item until the patients fully understood each item.  
13  
14  
15  
16  
17  
18  
19  
20  
21

22 We proposed a hypothetical situation of poor blood pressure control and  
23 uncomfortable symptoms. Patients were asked to think carefully and make a trade-off  
24 between two types of services for their first-contact care. The duration of the survey  
25 ranged from 20 minutes to one hour. Patients were informed that participation in the  
26 survey was anonymous and voluntary, and their verbal and informed consent was  
27 obtained prior to the survey. We gave each patient a wrapped cotton towel as a gift  
28 (CNY 10, or US\$1.4).  
29  
30  
31  
32  
33  
34  
35  
36  
37  
38

## 39 **Patient and public involvement**

40 One hundred and eight patients participated in the pilot survey to provide  
41 feedback on the intelligibility and acceptability of the questionnaire. Responses from  
42 the patients contributed to a more apprehensible and concise description of the DCE  
43 questions. The patients engaged in the pilot were not involved in the formal survey.  
44 No patients took part in the recruitment of study participants or the carry out of the  
45 study.  
46  
47  
48  
49  
50  
51

## 52 **Statistical Analysis**

53  
54  
55 Our DCE data analysis was based on the random-effects model.<sup>38</sup> In the random  
56 utility theory, the conventional utility function  $U$  consists of two parts: one is the  
57 determinism  $V$  containing the observable component, and the other is the random  
58  
59  
60

component  $\varepsilon$  representing the random error term with standard statistical properties.<sup>39</sup>

Therefore, the utility of the individual  $i$  of alternative  $n$  is:

$$U_{in} = V_{in} + \varepsilon_{in} \quad (1)$$

According to equation (1), the probability of the respondent choosing designated healthcare services was simulated. The probability of choice was determined by the indirect utility function of the respondent  $i$  who choose  $j$  in the selection set  $s$ . It was assumed to be a linear and additive form, and its form was:

$$V_{ijs} = X_{ijs}\beta + \varepsilon_{ijs} \quad (2)$$

Where  $V_{ijs}$  represented the utility derived from a choice,  $X_{ijs}\beta$  was the utility component, and  $\varepsilon$  was the random component. The  $X_{ijs}\beta$  was specified below, where  $\beta_{1-6}$  represented reference scores of attributes and  $\beta_0$  was the constant:

$$X_{ijs}\beta_j = \beta_0 + \beta_1 \text{Treatment effects}_j + \beta_2 \text{Physician - patient communication}_j + \beta_3 \text{Continuity of care}_j + \beta_4 \text{Waiting time}_j + \beta_5 \text{Travel time}_j + \beta_6 \text{Out - of - pocket costs}_j \quad (3)$$

We implemented the above equation by mixed logit regression using STATA 14.2 SE (STATA Corp LLC, College Station, Texas, USA) and was specified with 500 Halton draws. The mixed logit model allows for unknown heterogeneity in individual preferences. We assumed that all variables of the attributes had a random component and that the weights of preference were normally distributed.<sup>40</sup> The choice of patients was the dependent variable, and the selected attributes were independent variables.

Respondents' characteristics are likely to influence their decisions, but they are neither part of the choice alternatives nor a direct source of utility. One way to investigate how respondents' characteristics affect their choices is to include interaction terms between attributes and individuals' characteristics, allowing weights of the attributes to vary with characteristics.<sup>41</sup> Therefore, we extended the main effects model with interaction terms between attribute levels and the factors likely to influence patients' choice. The interaction terms were specified as random parameters

1  
2  
3  
4 to keep suitable computation times. To assess whether preferences varied, we  
5 performed  $\chi^2$  tests for joint significance. Standard errors were clustered at the  
6 respondent level during the analysis.  
7  
8

9  
10 Effects coding was used for categorical variables in DCE data. For effects  
11 coding, the mean effect for each attribute was normalized at zero, rather than all the  
12 reference categories were set to zero.<sup>42</sup> Each coefficient was estimated relative to the  
13 mean attribute effect.<sup>42</sup> The marginal rate of substitution (MRS) between attributes  
14 could be obtained by calculating the ratio of the partial derivatives of each attribute,  
15 where  $\beta$  was the coefficient of the attribute.  
16  
17  
18  
19  
20

$$21 \quad MRS = -\frac{\beta_a}{\beta_b} \quad (4)$$

22  
23  
24 Since our DCE attributes included costs, it could be used to generate an estimate  
25 of willingness to pay (WTP) of attributes expressed as in the unit of cost by replacing  
26 the denominator with the  $\beta$  estimate for the cost attribute. According to the estimated  
27 preference scores for each attribute level, WTP for changing attribute A from level 1  
28 to level 2 could be calculated as follows:  
29  
30  
31  
32  
33

$$34 \quad WTP = -\frac{\beta_{A2} - \beta_{A1}}{\beta_{cost}} \quad (5)$$

35  
36  
37 where  $\beta_{cost}$  was the preference score of out-of-pocket costs, and  $\beta_{A1}$  and  $\beta_{A2}$  were  
38 preference scores of level 1 and level 2 for attribute A respectively.  
39  
40  
41

## 42 **RESULTS**

### 43 **Patients' characteristics**

44  
45  
46 A total of 722 hypertension patients were consented to participate in our DCE  
47 survey. 19 patients were excluded from the analysis due to non-compliance with the  
48 inclusion criteria, incomplete data, lack of understanding and confidence in making  
49 the DCE choices. As a result, data from 703 patients were available for analysis. Two  
50 hundred and seven patients (29.45%) were enrolled from primary healthcare facilities,  
51 247 (35.13%) from secondary hospitals, and 249 (35.42%) from tertiary hospitals. For  
52  
53  
54  
55  
56  
57  
58  
59  
60

1  
2  
3  
4 details about the number of patients in each sampled hospital, please refer to  
5  
6 Appendix 4. On average, patients found it easy to understand the scenarios (8.23,  
7  
8 95%CI 8.18-8.27), and confident in their choice (8.99, 95%CI 8.92-9.05).  
9

10  
11 Table 2 summarized the socio-demographic and clinical characteristics of  
12  
13 patients. The sample had more males than females (56.90% vs. 43.10%). The average  
14  
15 age was 64.66 years old (ranging from 24 to 96 years old). 38.26% of the monthly  
16  
17 household income was less than CNY 4,000. 416 patients (59.17%) had  
18  
19 comorbidities, and cardiovascular disease (191 patients) was the most common type  
20  
21 (Appendix 5). Only 47.80% of patients considered primary healthcare facilities as  
22  
23 their first choice, and only 26.17% of patients had contract service with general  
24  
25 practitioners.

26  
27 **Table 2. Characteristics of patients (N=703)**

| Variables                                   | N (%)       |
|---------------------------------------------|-------------|
| <b>Gender</b>                               |             |
| Male                                        | 400 (56.90) |
| Female                                      | 303 (43.10) |
| <b>Age<sup>#</sup></b>                      |             |
| <65                                         | 308 (43.81) |
| 65-74                                       | 258 (36.70) |
| ≥75                                         | 137 (19.49) |
| <b>Education</b>                            |             |
| Primary school/ Unschooling                 | 337 (47.94) |
| Junior high school/ High school             | 279 (39.69) |
| Junior college or higher vocational college | 54 (7.68)   |
| Bachelor's degree or above                  | 33 (4.69)   |
| <b>Employment</b>                           |             |
| Farmer                                      | 278 (39.54) |
| Urban employee                              | 106 (15.08) |
| Freelancers                                 | 74 (10.53)  |
| Unemployed                                  | 22 (3.12)   |
| Retiree                                     | 223 (31.72) |
| <b>Type of public health insurance</b>      |             |
| UEBMI                                       | 272 (38.69) |
| URRBMI                                      | 431 (61.31) |

|                                                   |  |             |
|---------------------------------------------------|--|-------------|
| Monthly household income (CNY)                    |  |             |
| ≤2000                                             |  | 126 (17.92) |
| 2001~4000                                         |  | 143 (20.34) |
| 4001~6000                                         |  | 130 (18.49) |
| 6001~8000                                         |  | 91 (12.95)  |
| 8001~10000                                        |  | 72 (10.24)  |
| 10001~12000                                       |  | 54 (7.68)   |
| >12000                                            |  | 87 (12.38)  |
| Duration after diagnosis of hypertension (years)  |  |             |
| ≤10                                               |  | 474 (67.43) |
| >10                                               |  | 229 (32.57) |
| Comorbidities                                     |  |             |
| No                                                |  | 287 (40.83) |
| Yes                                               |  | 416 (59.17) |
| The most frequently visited healthcare facilities |  |             |
| Primary healthcare facilities                     |  | 336 (47.80) |
| Secondary hospitals                               |  | 228 (32.43) |
| Tertiary hospitals                                |  | 139 (19.77) |
| Contract service with general practitioners       |  |             |
| No                                                |  | 519 (73.83) |
| Yes                                               |  | 184 (26.17) |
| EQ-5D-5L index value <sup>Δ</sup>                 |  |             |
| ≤0.85                                             |  | 423 (60.17) |
| >0.85                                             |  | 280 (39.83) |

Notes: UEBMI, Urban Employees Basic Medical Insurance; URRBMI, Urban-Rural Residents Basic Medical Insurance; CNY, Chinese yuan

#Patients were divided into three groups: young and middle-aged (younger than 65 years old), young-old elderly (aged 65-74), old-old elderly (aged 75 and older).<sup>43</sup>

<sup>Δ</sup>The utility index was derived from the Chinese value sets.<sup>44</sup>

## Model estimation of preferences

We found that patients valued healthcare services that generated good treatment effects ( $\beta=4.502$ ,  $p<0.05$ ), followed by travel time to healthcare facilities within 1 hour ( $\beta=1.285$ ,  $p<0.001$ ), and the adequate physician-patient communication ( $\beta=0.771$ ,  $p<0.001$ ) (Table 3). Minimal waiting time ( $\beta=0.447$ ,  $p<0.001$ ) and continuity of care ( $\beta=0.321$ ,  $p<0.001$ ) were also positive predictors of patients' choice



of healthcare services. While out-of-pocket cost was a negative predictor of patients' preferences ( $\beta = -0.168$ ,  $p < 0.001$ ). The SD revealed coefficient heterogeneity in the random parameters of attributes.

**Table 3. Estimates of the mixed logit model (N=703)**

| Attributes                                 | Mean      | SE         | SD       | SE    |
|--------------------------------------------|-----------|------------|----------|-------|
| <b>Treatment effects</b>                   |           |            |          |       |
| <i>Poor(ref)</i>                           | -4.299*** | 0.348      |          |       |
| <i>Moderate</i>                            | -0.204**  | 0.089      | 0.824*** | 0.160 |
| <i>Good</i>                                | 4.502*    | 0.357      | 2.148*** | 0.223 |
| <b>Physician-patient communication</b>     |           |            |          |       |
| <i>Poor(ref)</i>                           | -0.727*** | 0.089      |          |       |
| <i>Moderate</i>                            | -0.044    | 0.061      | -0.390** | 0.147 |
| <i>Good</i>                                | 0.771***  | 0.084      | 0.657*** | 0.116 |
| <b>Continuity of care</b>                  |           |            |          |       |
| <i>No(ref)</i>                             | -0.321*** | 0.048      |          |       |
| <i>Yes</i>                                 | 0.321***  | 0.048      | 0.318**  | 0.121 |
| <b>Waiting time</b>                        |           |            |          |       |
| <i>4 hours or longer (ref)</i>             | -0.476*** | 0.072      |          |       |
| <i>2 hours</i>                             | 0.029     | 0.063      | -0.137   | 0.225 |
| <i>Within 0.5 hour</i>                     | 0.447***  | 0.066      | 0.351**  | 0.132 |
| <b>Travel time</b>                         |           |            |          |       |
| <i>6 hours or longer (ref)</i>             | -1.490*** | 0.122      |          |       |
| <i>3 hours</i>                             | 0.205***  | 0.061      | 0.409*** | 0.122 |
| <i>Within 1 hour</i>                       | 1.285***  | 0.107      | 0.952*** | 0.111 |
| <b>Out-of-pocket costs (if reimbursed)</b> |           |            |          |       |
| Cost (per CNY50)                           | -0.168*** | 0.020      | 0.198*** | 0.033 |
| <b>Log likelihood</b>                      |           | -2299.4957 |          |       |
| <b>Observations</b>                        |           | 11248      |          |       |

Notes: Ref, reference; SE, standard error; SD, standard deviation; HRQoL, Health-related quality of life; CNY, Chinese yuan.

\* $p < 0.05$ ; \*\* $p < 0.01$ ; \*\*\* $p < 0.001$

The coefficient for the reference group was calculated as the negative sum of other coefficients.

## Marginal willingness to pay

According to the average WTP (Table 4), we found that patients highly valued the magnitude of treatment effects. They would be willing to pay an extra CNY 2,489 for healthcare services to improve the effects from poor to good, while their WTP to increase the effects from poor to moderate was CNY 1,155. The WTPs for other attributes from high to low were as follows: travel time, satisfied physician-patient communication, minimum waiting time, moderate physician-patient communication, and moderate waiting time.

**Table 4. Marginal willingness to pay for each attribute (N=703)**

| Attributes                                       | WTP (95% CI)        |
|--------------------------------------------------|---------------------|
| <b>Treatment effects</b>                         |                     |
| <i>From poor to moderate</i>                     | 1155*** (927~1383)  |
| <i>From poor to good</i>                         | 2489*** (2013~2965) |
| <b>Physician-patient communication</b>           |                     |
| <i>From poor to moderate</i>                     | 191*** (113~270)    |
| <i>From poor to good</i>                         | 423*** (315~532)    |
| <b>Continuity of care</b>                        |                     |
| <i>From no to yes</i>                            | 184*** (122~247)    |
| <b>Waiting time</b>                              |                     |
| <i>From 4 hours or longer to 0.5-2 hours</i>     | 146*** (73~219)     |
| <i>From 4 hours or longer to within 0.5 hour</i> | 265*** (185~346)    |
| <b>Travel time</b>                               |                     |
| <i>From 6 hours or longer to 1-3 hours</i>       | 481*** (368~594)    |
| <i>From 6 hours or longer to within 1 hour</i>   | 783*** (615~950)    |

Notes: CNY, Chinese Yuan; \*\*\*p<0.001

## Preference heterogeneity

The impact of patients' characteristics on preferences for healthcare services was shown in Appendix 6. We tested for interactions of monthly household income levels with different attributes. Compared with low-income patients, those who had high income showed stronger preferences for good physician-patient communication ( $\beta=0.377$ ,  $p<0.05$ ) and minimum waiting time ( $\beta=0.396$ ,  $p<0.01$ ) (Model 1). The

1  
2  
3  
4 negative interaction term between income and moderate treatment effects showed that  
5 high-income patients valued the moderate effects to be less important than did  
6 low-income patients.  
7  
8  
9

10 Similarly, we tested for interactions of age with the attributes, with young or  
11 mid-aged patients as the reference category (Model 2). Four interaction terms were  
12 statistically significant: good treatment effects ( $\beta=2.839$ ,  $p<0.001$ ), shortest travel  
13 time ( $\beta=0.533$ ,  $p<0.01$ ), good physician-patient communication ( $\beta=0.442$ ,  $p<0.05$ ),  
14 and continuity of care ( $\beta=0.232$ ,  $p<0.05$ ).  
15  
16  
17  
18  
19

20 There were statistically significant interaction terms of comorbidities with three  
21 attributes. Patients who had comorbidities favored more in healthcare services that  
22 generated good treatment effects ( $\beta=0.986$ ,  $p<0.05$ ), required minimum travel time  
23 ( $\beta=0.588$ ,  $p<0.01$ ), and ensured continuity of care ( $\beta=0.318$ ,  $p<0.01$ ) (Model 3).  
24  
25  
26  
27  
28

29 Compared with patients who usually visited primary healthcare facilities, those  
30 who tended to seek healthcare services from secondary or tertiary hospitals expressed  
31 a stronger preference for good treatment effects ( $\beta=0.898$ ,  $p<0.05$ ) and minimum  
32 waiting time ( $\beta=0.351$ ,  $p<0.05$ ) (Model 4). Patients with higher HRQoL paid more  
33 attention to healthcare services that contributed to good treatment effects ( $\beta=1.748$ ,  
34  $p<0.01$ ) (Model 5).  
35  
36  
37  
38  
39  
40  
41

## 42 **DISCUSSION**

### 43 **Patients' preferences for healthcare services**

44  
45  
46  
47 To the best of our knowledge, this is the first DCE that systematically  
48 investigated the attributes influencing the choice of healthcare services for  
49 first-contact care among chronic disease patients like hypertension in China. An  
50 in-depth understanding of patients' perspectives on different healthcare service  
51 attributes is of global interest since it could inform the providing of appropriate  
52 healthcare that could improve patient satisfaction and service utilization.  
53  
54  
55  
56  
57  
58  
59

60 According to the estimated attribute-level coefficients, we found that the

1  
2  
3  
4 treatment effect was the most important attribute defining patients' preferences. Our  
5 results also showed that older adults, patients who had higher HRQoL, with  
6 comorbidities, and who usually visited secondary or tertiary hospitals to treat  
7 hypertension cared more about good treatment effects. The findings highlight the  
8 importance of taking effectiveness into account to improve patients' acceptance of  
9 primary healthcare services. However, the clinical experience of physicians<sup>14 17</sup> and  
10 types of healthcare professionals,<sup>15 16</sup> rather than treatment effects were often used to  
11 reflect the capabilities of healthcare provision in previous studies. In fact, preferences  
12 for provider types, which involved gender, types of medical staff, job titles, and  
13 professional training experience, were complex and difficult to interpret.  
14  
15  
16  
17  
18  
19  
20  
21  
22

23  
24 Our findings demonstrated that the minimum travel time to the healthcare facility  
25 was the second most important attribute. The results were consistent with previous  
26 DCEs, as the respondents disliked traveling longer distances to the healthcare  
27 providers.<sup>16 21 45</sup> Patients who were older and those who had comorbidities might feel  
28 inconvenient to travel a long distance for the first-contact care and rated shortest  
29 travel time to be more important than the counterparts.  
30  
31  
32  
33  
34  
35

36 Continuity of care was concerned with the quality of care over time.  
37 Traditionally, continuity of care is idealized in the patients' experience of a  
38 continuous caring relationship with the same healthcare professionals, as shown in  
39 previous DCEs.<sup>45-48</sup> However, for providers in vertically integrated healthcare  
40 systems, the contrasting ideal is the delivery of a 'seamless service'.<sup>49</sup> In our study,  
41 continuity of care was defined as coordinated and patient-centered care. It is a process  
42 involving the orderly, uninterrupted movement of patients among the diverse  
43 elements of the service delivery system.<sup>49</sup> We found that patients desired healthcare  
44 services that were consistent and coordinated according to their health needs. In  
45 addition, the continuity of care was considered even more important for older patients  
46 and patients who had comorbidities. They needed more health resources than other  
47 groups, and their choices of first-contact care should be paid more attention to.  
48  
49  
50  
51  
52  
53  
54  
55  
56  
57  
58  
59  
60

We found that good physician-patient communication was also an important

1  
2  
3  
4 attribute preferred by patients. In fact, effective physician-patient communication is  
5 essential in healthcare, affecting the patients' compliance with recommendations for  
6 care.<sup>50</sup> Physician-patient communication is a powerful indicator of healthcare quality  
7 that can determine patients' self-management behavior and satisfaction with  
8 healthcare providers.<sup>51 52</sup> This is shown by greater patient involvement and decisions  
9 are reached through shared decision-making.<sup>53</sup> Our analyses revealed that  
10 high-income and older patients valued good physician-patient communication more  
11 than did lower-income and younger groups.  
12  
13  
14  
15  
16  
17  
18  
19

20 Longer waiting time and increased out-of-pocket costs were significant, negative  
21 predictors for the entire sample, showing that patient preferences decreased as the  
22 waiting time and out-of-pocket costs increased. Similar results were noted in DCEs  
23 eliciting preferences for the choice of healthcare providers.<sup>19 21</sup> What's more, we  
24 found high-income patients and those who likely to visit secondary or tertiary  
25 hospitals were more concerned about waiting time. As shown in the previous study  
26 conducted in a Chinese public tertiary hospital, the reduced waiting time led to  
27 increased patient satisfaction.<sup>54</sup> Patients might have an increased willingness to pay  
28 for services that require less waiting time for an appointment to diagnose or treat,  
29 especially in the case of severe symptoms.<sup>55</sup>  
30  
31  
32  
33  
34  
35  
36  
37  
38  
39

## 40 **Implications of the study findings**

41  
42 In China, patients sought first-contact care in a disorderly manner, and the  
43 gate-keeping role of primary healthcare has not been fully implemented.<sup>56</sup> Patients'  
44 preferences should be known to guide the delivery of appropriate, effective, and  
45 efficient care. Our research confirms that the ideal healthcare services that meet  
46 hypertension patients' demands for first-contact care comprise the following  
47 attributes: produce good treatment effects, closer to home, offer good  
48 physician-patient communication, need short waiting time, ensure continuity of care  
49 and require low out-of-pockets per visit.  
50  
51  
52  
53  
54  
55  
56  
57  
58

59 The treatment effect was the most important attribute to attract patients. Patients  
60

1  
2  
3  
4 were more likely to choose the healthcare services that led to the experience of good  
5 quality. It is worth noting that older patients, patients who had high HRQoL, patients  
6 with comorbidities, and those who tended to visit secondary or tertiary hospitals  
7 would pay special attention to treatment effects. Meanwhile, patients expect to  
8 communicate with physicians to deliberate and express their preferences and views  
9 during the clinical decision-making process. Furthermore, older patients who are  
10 emotionally vulnerable and socially isolated are particularly in need of the emotional,  
11 social, and practical support that sensitive physician-patient communication can  
12 provide.<sup>57</sup>

13  
14 Evidence of variations in the perceived utility of healthcare services among  
15 patients emphasizes the importance of taking individual patient preferences into  
16 account to address the problems of inadequate primary healthcare service utilization  
17 and the ineffectiveness of the two-way referral mechanism. Healthcare systems need  
18 to be adaptable enough to offer patients choices to account for heterogeneity in  
19 patients' preferences.

20  
21  
22 Our study highlights the importance of improved service quality, timely access,  
23 and shared decision-making for the first-contact care of chronic diseases like  
24 hypertension. The improvement of service quality, physician-patient communication,  
25 and continuity of care will contribute to patients' preference to choose primary  
26 healthcare facilities as the first-contact care. Our findings were consistent with the  
27 optimal healthcare delivery strategies to achieve universal health coverage, which  
28 involves providing effective, safe, people-centered care that is timely, equitable,  
29 integrated, and efficient.<sup>58</sup>

30  
31  
32 The quality of primary healthcare in China needed to be strengthened, and  
33 evidence-based monitoring and evaluation of the service quality are crucial for  
34 attaining the goals of healthcare system reform.<sup>56</sup> In addition to education for the  
35 general practitioners, the Chinese government could consider tailoring continuing  
36 training for the primary healthcare workforce.<sup>59</sup> Shared decision-making is  
37 appropriate for clinical decisions involving multiple reasonable options,<sup>60</sup> such as the

1  
2  
3  
4 management of chronic diseases. To improve the physicians' communication skills,  
5 strictly planned, culturally competent, effectively implemented, and rigorously  
6 evaluated trainings are required.<sup>61</sup> Care coordination approaches should also be  
7  
8 advocated to engage patients in decision-making, support effective management of  
9  
10 comorbidities, and ensure accessibility to interventions. Furthermore, the primary  
11  
12 healthcare-based integrated delivery system in China should be strengthened.<sup>62</sup>  
13  
14

## 15 **Strengths and limitations**

16  
17  
18 Our DCE provides valuable information about how patients weigh their  
19  
20 first-contact care options and trade-off different healthcare service features. A better  
21  
22 understanding of patients' preferences will guide the future development of the  
23  
24 two-way referral mechanism, as policymakers aim to bridge the gap between the  
25  
26 optimal models for patient-centered service delivery and patients' first-contact care  
27  
28 needs.  
29

30  
31 The major contributions of our study are as follows. First, we used a DCE which  
32  
33 followed good research practices, offering the advantage to explore the trade-offs  
34  
35 between attributes of healthcare services. Second, the Bayesian-efficient design was  
36  
37 applied to increase the statistical efficiency of the choice sets design, and a blocking  
38  
39 technique was used to increase the response efficiency of patients. Third, we derived  
40  
41 WTP estimates in hypothetical settings among patients with chronic diseases like  
42  
43 hypertension. Fourth, this is the most comprehensive study that identifies preference  
44  
45 heterogeneity according to age, income, HRQoL, comorbidities, and past healthcare  
46  
47 service experience.  
48

49  
50 Our study has several limitations. First, the DCE results are not representative of  
51  
52 all patients with chronic diseases, because we only explored the preferences among  
53  
54 hypertension patients to ensure the comparability of patients. Future studies need to  
55  
56 enroll patients with other types of chronic diseases and identify variations in patients'  
57  
58 preferences across different subgroups. Second, our samples were from Jiangsu and  
59  
60 Shanghai, which stand for the most economically developed regions in China. Future

1  
2  
3  
4 studies should have a nationally representative sample by including the economically  
5 underdeveloped regions. Third, given the limited number of attributes and levels  
6 tested in DCE, it might not represent complex real-life situations. To further  
7 understand the relationship between stated (those elicited in the DCE) and revealed  
8 preferences (actual first-contact care-seeking behavior), studies are warranted to  
9 investigate if and how patients' preferences in healthcare services impact their  
10 long-term clinical outcomes.  
11  
12  
13  
14  
15  
16

## 17 18 **CONCLUSION**

19  
20  
21 Our DCE provides evidence about how hypertension patients value the attributes  
22 of healthcare services, including the capabilities, efficiency, affordability, and  
23 convenience of service provision, in the context of chaotic first-contact care-seeking  
24 behavior in China. The findings underline the importance of effective, convenient,  
25 efficient, coordinated, and patient-centered care for chronic diseases like  
26 hypertension. We also found preference heterogeneity that is correlated with patients'  
27 socio-demographic characteristics, feelings of health conditions, the severity of  
28 disease (i.e. comorbidities), and the prior experience of healthcare services.  
29 Policymakers and healthcare providers are suggested to work on aligning the service  
30 provision with patients' preferences, thus promoting the rational utilization of  
31 healthcare resources.  
32  
33  
34  
35  
36  
37  
38  
39  
40  
41  
42  
43

## 44 **Ethics approval**

45  
46 This study, including the patient consent process, has been approved by the  
47 Medical Ethics Committee in Nantong University (Ethical Approval-202054) and  
48 conforms to the ethical guidelines of the Declaration of Helsinki.  
49  
50  
51

## 52 **Acknowledgments**

53  
54 We acknowledge the contributions made by our interviewers who did  
55 one-to-one, face-to-face interviews with the patients. We are grateful to the patients  
56 for their time and efforts. We sincerely thank the reviewers for providing valuable  
57  
58  
59  
60



1  
2  
3  
4 comments and suggestions on the manuscript.  
5

6 We acknowledge the guidance from Professor Hao Yu from Harvard Medical  
7 School and Harvard Pilgrim Healthcare Institute on the research design. At the time of  
8 drafting the research protocol, Jinsong Geng was a fellow at the Fellowship in Health  
9 Policy and Insurance Research, Department of Population Medicine, Harvard Medical  
10 School and Harvard Pilgrim Healthcare Institute.  
11  
12  
13  
14  
15

### 16 **Author contributions**

17  
18  
19 Geng JS, Yu XL, and Bao HN led the design and analysis of the discrete choice  
20 experiment. Shi JW and Yuan XY contributed to the literature search and data  
21 interpretation. Yu XL, Qian LL, and Feng Z contributed to implementing the discrete  
22 choice experiment. Yu XL, Bao HN and Geng JS performed the statistical analysis  
23 and wrote the manuscript.  
24  
25  
26  
27  
28  
29

### 30 **Funding**

31  
32  
33 This work was supported by the National Natural Science Foundation of China  
34 (Grant No. 71603138), Nantong Municipal Health Commission (Grant No.  
35 2020JCC003), and Key Project of Technology Innovation Think Tanks in Nantong  
36 (Grant No. CXZK202002). The funders provided financial support for the conduct of  
37 the study. The funders had no role in the design, implementation, data collection and  
38 statistical analysis, data interpretation, or writing of the manuscript.  
39  
40  
41  
42  
43  
44

### 45 **Disclosure**

46  
47  
48 The authors report no conflict of interest in this research.  
49  
50

### 51 **Data sharing statement**

52  
53  
54 Data will be available upon reasonable request to the corresponding author.  
55  
56  
57  
58  
59  
60

## References

1. Yusuf S, Joseph P, Rangarajan S, *et al*. Modifiable risk factors, cardiovascular disease, and mortality in 155 722 individuals from 21 high-income, middle-income, and low-income countries (pure): a prospective cohort study. *Lancet* 2020;395:795-808.
2. National Health Commission of the People's Republic of China. *China Health Statistics Yearbook*. Beijing: National Health Commission of the People's Republic of China 2020:239-240.
3. Mahajan S, Feng F, Hu S, *et al*. Assessment of prevalence, awareness, and characteristics of isolated systolic hypertension among younger and middle-aged adults in China. *JAMA Netw Open* 2020;3:e209743.
4. Wang Z, Chen Z, Zhang L, *et al*. Status of hypertension in China: results from the China hypertension survey, 2012-2015. *Circulation* 2018;137:2344-56.
5. Lu J, Lu Y, Wang X, *et al*. Prevalence, awareness, treatment, and control of hypertension in China: data from 1.7 million adults in a population-based screening study (China PEACE Million Persons Project). *Lancet* 2017;390:2549-58.
6. Wong MC, Wang HH, Cheung CS, *et al*. Factors associated with multimorbidity and its link with poor blood pressure control among 223,286 hypertensive patients. *Int J Cardiol* 2014;177:202-8.
7. Gu S, Hu H, Dong H. Systematic review of the economic burden of pulmonary arterial hypertension. *Pharmacoeconomics* 2016;34:533-50.
8. Tao W, Zeng Z, Dang H, *et al*. Towards universal health coverage: lessons from 10 years of healthcare reform in China. *BMJ Glob Health* 2020;5:e002086.
9. Li M, Zhang Y, Lu Y, *et al*. Factors influencing two-way referral between hospitals and the community in China: a system dynamics simulation model. *Simulation* 2017;94:765-82.
10. National Health Commission of the People's Republic of China. *China Health Statistics Yearbook*. Beijing: National Health Commission of the People's Republic of China 2020:124-125.
11. Liu X, Hou Z, Towne SD, *et al*. Knowledge, attitudes, and practices related to the establishment of the National Hierarchical Medical System (NHMS) among outpatients in Chinese tertiary hospitals. *Medicine (Baltimore)* 2018;97:e11836.
12. Liu X, Tan A, Towne SD, *et al*. Awareness of the role of general practitioners in primary care among outpatient populations: evidence from a cross-sectional survey of tertiary hospitals in China. *BMJ Open* 2018;8:e020605.
13. Zhang A, Nikoloski Z, Albala SA, *et al*. Patient choice of health care providers in China: primary care facilities versus hospitals. *Health Syst Reform* 2020;6:e1846844.
14. Miners AH, Llewellyn CD, Cooper VL, *et al*. A discrete choice experiment to assess people living with HIV's (PLWHIV's) preferences for GP or HIV clinic appointments. *Sex Transm Infect* 2017;93:105-11.
15. Beam NK, Dadi GB, Rankin SH, *et al*. A discrete choice experiment to determine facility-based delivery services desired by women and men in rural Ethiopia. *BMJ Open* 2018;8: e016853.
16. Wong SF, Norman R, Dunning TL, *et al*. A discrete choice experiment to examine the preferences of patients with cancer and their willingness to pay for different types of

- 1  
2  
3 health care appointments. *J Natl Compr Canc Netw* 2016;14:311-9.
- 4  
5 17. O'Hara NN, Slobogean GP, Mohammadi T, *et al.* Are patients willing to pay for total  
6 shoulder arthroplasty? evidence from a discrete choice experiment. *Can J Surg*  
7 2016;59:107-12.
- 8  
9 18. Van de Schoot T, Pavlova M, Atanasova E, *et al.* Preferences of Bulgarian consumers for  
10 quality, access and price attributes of healthcare services-result of a discrete choice  
11 experiment. *Int J Health Plann Manage* 2017;32:e47-e71.
- 12  
13 19. Liu Y, Kong Q, De Bekker-Grob EW. Public preferences for health care facilities in rural  
14 China: a discrete choice experiment. *Soc Sci Med* 2019;237:112396..
- 15  
16 20. Zanolini A, Sikombe K, Sikazwe I, *et al.* Understanding preferences for HIV care and  
17 treatment in Zambia: evidence from a discrete choice experiment among patients who  
18 have been lost to follow-up. *PLoS Med* 2018;15:e1002636.
- 19  
20 21. Zhu J, Li J, Zhang Z, *et al.* Exploring determinants of health provider choice and  
21 heterogeneity in preference among outpatients in Beijing: a labelled discrete choice  
22 experiment. *BMJ Open* 2019;9:e023363.
- 23  
24 22. Bahrapour M, Bahrapour A, Amiresmaili M, *et al.* Hospital service quality - patient  
25 preferences - a discrete choice experiment. *Int J Health Care Qual Assur* 2018;31:676-83.
- 26  
27 23. Dolan P, Tsuchiya A. Health priorities and public preferences: the relative importance of  
28 past health experience and future health prospects. *J Health Econ* 2005;24:703-14.
- 29  
30 24. Garland SN, Eriksen W, Song S, *et al.* Factors that shape preference for acupuncture or  
31 cognitive behavioral therapy for the treatment of insomnia in cancer patients. *Support*  
32 *Care Cancer* 2018;26:2407-15.
- 33  
34 25. USAID-funded Capacity Plus, World Health Organization, International Bank for  
35 Reconstruction and Development. *How to conduct a discrete choice experiment for health*  
36 *workforce recruitment and retention in remote and rural areas: a user guide with case*  
37 *studies*. Geneva: World Health Organization Press, 2012.
- 38  
39 26. Health Quality Ontario. Continuity of care to optimize chronic disease management in the  
40 community setting: an evidence-based analysis. *Ont Health Technol Assess Ser*  
41 2013;13:1-41.
- 42  
43 27. Ha JF, Longnecker N. Doctor-patient communication: a review. *Ochsner J*  
44 2010;10:38-43.
- 45  
46 28. Reed Johnson F, Lancsar E, Marshall D, *et al.* Constructing experimental designs for  
47 discrete-choice experiments: report of the ISPOR conjoint analysis experimental design  
48 good research practices task force. *Value Health* 2013;16:3-13..
- 49  
50 29. Kløjgaard ME, Bech M, Søgaard R. Designing a stated choice experiment: the value of a  
51 qualitative process. *J Choice Model* 2012;5:1-18.
- 52  
53 30. Seghieri C, Mengoni A, Nuti S. Applying discrete choice modelling in a priority setting:  
54 an investigation of public preferences for primary care models. *Eur J Health Econ*  
55 2014;15:773-85.
- 56  
57 31. Ryan M, Skåtun D. Modelling non-demanders in choice experiments. *Health Econ*  
58 2004;13:397-402.
- 59  
60 32. Veldwijk J, Lambooi MS, Bekker-Grob EWd, *et al.* The effect of including an opt-out  
option in discrete choice experiments. *PLoS One* 2014;9: e111805.
33. Dhar R, Simonson I. The effect of forced choice on choice. *J Mark Res* 2003;40:146 - 60.

- 1
- 2
- 3
- 4 34. Lu Y, Wang N, Chen Y, *et al*. Health-related quality of life in type-2 diabetes patients: a
- 5 cross-sectional study in east China. *BMC Endocr Disord* 2017;17: 1-7.
- 6 35. Bekker-Grob ED, Donkers B, Jonker MF, *et al*. Sample size requirements for discrete-
- 7 choice experiments in healthcare: a practical guide. *Patient* 2015;8:373-84.
- 8 36. Vanniyasingam T, Cunningham CE, Foster G, *et al*. Simulation study to determine the
- 9 impact of different design features on design efficiency in discrete choice experiments.
- 10 *BMJ Open* 2016;6:e011985-e85.
- 11 37. Johnson R, Orme B. *Sample size issues for conjoint analysis*. In: Orme B, ed. Getting
- 12 started with conjoint analysis: strategies for product design and pricing research.
- 13 Madison: Research Publishers 2010:57-66.
- 14 38. Manski CF. The structure of random utility models. *Theory Decis* 1977;8: 229-254.
- 15 39. Nieboer AP, Koolman X, Stolk EA. Preferences for long-term care services: willingness
- 16 to pay estimates derived from a discrete choice experiment. *Soc Sci Med*
- 17 2010;70:1317-1325.
- 18 40. Phillips EA, Himmeler SF, Schreygg J. Preferences for e-mental health interventions in
- 19 Germany: a discrete choice experiment. *Value Health* 2021;24: 421-430.
- 20 41. Umar N, Quaife M, Exley J, *et al*. Toward improving respectful maternity care: a discrete
- 21 choice experiment with rural women in northeast Nigeria. *BMJ Glob Health*
- 22 2020;5:e002135.
- 23 42. Hauber AB, González JM, Groothuis-Oudshoorn CGM, *et al*. Statistical methods for the
- 24 analysis of discrete choice experiments: a report of the ISPOR conjoint analysis good
- 25 research practices task force. *Value Health* 2016;19: 300-315.
- 26 43. Zhang P, Xiong J, Zeng J. Clinical evaluation of active tuberculosis-related deaths in
- 27 Shenzhen, China: a descriptive study. *Int J Gen Med* 2021;14:237-42.
- 28 44. Liang Z, Zhang T, Lin T, *et al*. Health-related quality of life among rural men and women
- 29 with hypertension: assessment by the EQ-5D-5L in Jiangsu, China. *Qual Life Res*
- 30 2019;28: 2069-2080.
- 31 45. Zickafoose JS, DeCamp LR, Prosser LA. Parents' preferences for enhanced access in the
- 32 pediatric medical home: a discrete choice experiment. *JAMA Pediatr* 2015;169:358-64.
- 33 46. Fletcher BR, Rowe R, Hollowell J, *et al*. Exploring women's preferences for birth
- 34 settings in England: a discrete choice experiment. *PLoS One* 2019;14: e0215098.
- 35 47. Berhane A, Enquesselassie F. Patients' preferences for attributes related to health care
- 36 services at hospitals in Amhara region, northern Ethiopia: a discrete choice experiment.
- 37 *Patient Prefer Adherence* 2015; 9:1293-301.
- 38 48. Fawsitt CG, Bourke J, Greene, RA, *et al*. What do women want? valuing women's
- 39 preferences and estimating demand for alternative models of maternity care using a
- 40 discrete choice experiment. *Health Policy* 2017;121: 1154-1160.
- 41 49. Gulliford M, Naithani S, Morgan M. What is 'continuity of care'? *J Health Serv Res*
- 42 *Policy* 2006;11:248-50.
- 43 50. Roberts MJ, Campbell JL, Abel GA, *et al*. Understanding high and low patient experience
- 44 scores in primary care: analysis of patients' survey data for general practices and
- 45 individual doctors. *BMJ* 2014;349:g6034.
- 46 51. Matusitz J, Spear J. Effective doctor-patient communication: an updated examination. *Soc*
- 47 *Work Public Health* 2014;29:252-66.
- 48
- 49
- 50
- 51
- 52
- 53
- 54
- 55
- 56
- 57
- 58
- 59
- 60

- 1  
2  
3  
4  
5  
6  
7  
8  
9  
10  
11  
12  
13  
14  
15  
16  
17  
18  
19  
20  
21  
22  
23  
24  
25  
26  
27  
28  
29  
30  
31  
32  
33  
34  
35  
36  
37  
38  
39  
40  
41  
42  
43  
44  
45  
46  
47  
48  
49  
50  
51  
52  
53  
54  
55  
56  
57  
58  
59  
60
52. Alfred M, Ubogaya K, Chen X, *et al.* Effectiveness of culturally focused interventions in increasing the satisfaction of hospitalized Asian patients: a systematic review. *JBI Database System Rev Implement Rep* 2016;14:219-56.
  53. Birkeland S, Bismark M, Barry MJ, *et al.* Is greater patient involvement associated with higher satisfaction? experimental evidence from a vignette survey. *BMJ Qual Saf* 2021 doi: 10.1136/bmjqs-2020-012786.
  54. Sun J, Lin Q, Zhao P, *et al.* Reducing waiting time and raising outpatient satisfaction in a Chinese public tertiary general hospital-an interrupted time series study. *BMC Public Health* 2017;17:668.
  55. Roll K, Stargardt T, Schreyögg J. Effect of type of insurance and income on waiting time for outpatient care. *Geneva Pap Risk Insur Issues Pract* 2012;37:609-32.
  56. Liao R, Liu Y, Peng S, *et al.* Factors affecting health care users' first contact with primary health care facilities in north eastern China, 2008-2018. *BMJ Glob Health* 2021;6 doi: 10.1136/bmjgh-2020-003907.
  57. Williams SL, Haskard KB, DiMatteo MR. The therapeutic effects of the physician-older patient relationship: effective communication with vulnerable older patients. *Clin Interv Aging* 2007;2:453-67.
  58. World Health Organization, International Bank for Reconstruction and Development, Organization for Economic Cooperation and Development. *Delivering quality health services: a global imperative for universal health coverage*. World Bank Publications. Geneva: World Health Organization, 2018:27-39.
  59. Li X, Krumholz HM, Yip W, *et al.* Quality of primary health care in China: challenges and recommendations. *Lancet* 2020;395:1802-12.
  60. Backman WD, Levine SA, Wenger NK, *et al.* Shared decision-making for older adults with cardiovascular disease. *Clin Cardiol* 2020;43:196-204.
  61. Liu X, Rohrer W, Luo A, *et al.* Doctor-patient communication skills training in mainland China: a systematic review of the literature. *Patient Educ Couns* 2015;98:3-14.
  62. Yip W, Fu H, Chen AT, *et al.* 10 years of health-care reform in China: progress and gaps in universal health coverage. *Lancet* 2019;394:1192-204.

## Appendix 1: Explanations to attributes and levels

Investigators were required to convey the following definitions to patients:

- Treatment effects: ‘Good treatment effects’ means that the ideal treatment goals set out in the evidence-based guidelines for individual patients can be achieved, and your accompanying symptoms disappear; ‘Moderate treatment effects’ suggests that although the blood pressure is almost to the ideal treatment goals, the accompanying symptoms still exist; ‘Poor treatment effects’ implies that both blood pressure and accompanying symptoms are not well controlled.
- ‘Physician-patient communication’ refers to the communication between the physician and the patient. ‘Good’ suggests that the physician always treats patients with respect, listens carefully when the patient is explaining, and engages the patient in clinical decision-making; ‘Moderate’ implies that the physician sometimes treats patients with respect, and sometimes feels boring and becomes impolite; listening to patients explaining, but not likely to involve the patient in clinical decision-making; ‘Poor’ indicates that attitude of the physician is impatient and impolite, never engages the patient in clinical decision-making.
- ‘Continuity of care’ suggests that the healthcare facility operates in a well-functioning integrated care delivery system, which can provide coordinated healthcare services for chronic disease patients, i.e. the appropriate care and care management is perceived to occur at the right time and in the right order.
- ‘Waiting time’ is the amount of time for patients seeking care at the healthcare facility before being attended for physician consultation, i.e. the time from registration to seeing a physician.
- ‘Travel time’ refers to the time it takes for the patient to drive from home to the healthcare facility (one way). In our study, the travel time is measured by taking a taxi or private car.
- The cost is defined as the out-of-pocket costs per visit if reimbursed, including the direct medical costs when accessing care. Those who participate in public health insurance programs may be eligible to receive reimbursement which contributes to reducing the out-of-pocket costs.



## Appendix 2: Examples of DCE choice sets

Suppose you have poor blood pressure control, which results in uncomfortable symptoms like dizziness, headache, palpitation, chest pain, shortness of breath, nausea. If you can only choose one type of healthcare service for your first-contact visit, which one would you prefer? Please think carefully and make a trade-off.

| Attributes                          | Type A                                                                                                 | Type B                                                                                                   |
|-------------------------------------|--------------------------------------------------------------------------------------------------------|----------------------------------------------------------------------------------------------------------|
| Treatment effects                   | <br>Moderate          | <br>Poor              |
| Out-of-pocket costs (if reimbursed) | <br>CNY 300 per visit | <br>CNY 150 per visit |
| Physician-patient communication     | <br>Poor            | <br>Moderate        |
| Continuity of care                  | <br>Yes             | <br>No              |
| Waiting time                        | <br>Within 0.5 hour | <br>2 hours         |
| Travel time                         | <br>3 hours         | <br>Within 1 hour   |
| Your choice                         | <input type="checkbox"/>                                                                               | <input type="checkbox"/>                                                                                 |

### Appendix 3: Evaluation of patients' understanding and confidence in DCE choices

1. Do you feel difficult or easy to understand the DCE scenarios and choice sets?

Please select the level from zero to 10 and give a tick '√' in the score to reflect your understanding:

0: extremely difficult

10: extremely easy

0 1 2 3 4 5 6 7 8 9 10

↓ ↑

2. Are you confident in your choice of healthcare services? Please select the level from zero to 10 and give a tick '√' in the score to represent your confidence:

0: not confident at all

10: extremely confident

0 1 2 3 4 5 6 7 8 9 10

↓ ↑



## Appendix 4: Number of patients in the sampled healthcare facilities

Supplemental Table 1. Number of patients in the sampled healthcare facilities (N=703)

| Name of hospitals and health centers      | City/District* | Province | Grade <sup>#</sup> | Number of patients |
|-------------------------------------------|----------------|----------|--------------------|--------------------|
| Affiliated Hospital of Nantong University | Nantong        | Jiangsu  | 3                  | 249                |
| Tongzhou No.3 People's Hospital           | Nantong        | Jiangsu  | 2                  | 30                 |
| Rudong Yangkou Hospital                   | Nantong        | Jiangsu  | 1                  | 90                 |
| Chongchuan Fumin Health Center            | Nantong        | Jiangsu  | 1                  | 29                 |
| Xiangshui People's Hospital               | Yancheng       | Jiangsu  | 2                  | 113                |
| Dongtai People's Hospital                 | Yancheng       | Jiangsu  | 2                  | 45                 |
| Donghai People's Hospital                 | Lianyungang    | Jiangsu  | 2                  | 59                 |
| Pujiang Community Health Service Center   | Pujiang        | Shanghai | 1                  | 58                 |
| Zhuanqiao Community Health Service Center | Minhang        | Shanghai | 1                  | 30                 |

Notes: \*Districts in Shanghai municipality.

<sup>#</sup>In China, hospitals are divided into three grades, tertiary, secondary, and primary, with tertiary hospitals being the highest grade. The primary healthcare facilities consist of community health service centers or stations, which are located in urban areas, and township healthcare centers, which are located in rural areas. A secondary hospital is similar to a regional hospital. A tertiary hospital is a comprehensive, referral hospital at the city, provincial or national level, with at least 500 hospital beds that are able to provide advanced and specialized medical services.

## Appendix 5: Types of comorbidities in the patients

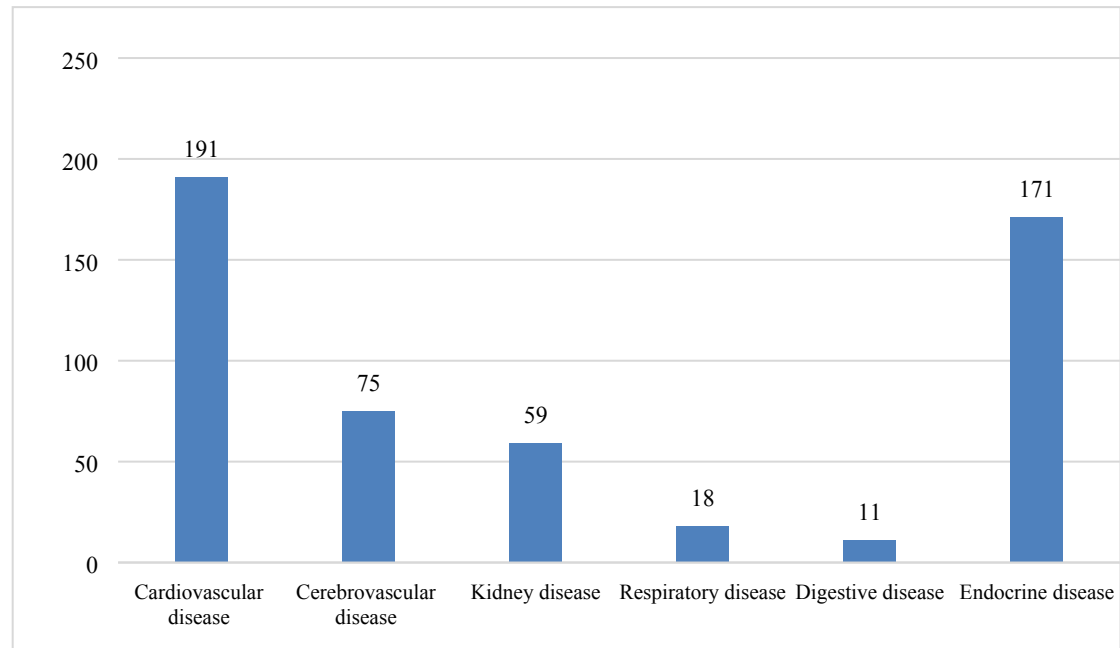

Supplemental Figure 1. Number of patients with comorbidities

## Appendix 6: Results of the interaction effects

Supplemental Table 2. Model estimation of the interaction effects between attributes and patients' characteristics

| Attributes                                 | Model 1   |       | Model 2   |       | Model 3   |       | Model 4   |       | Model 5   |       |
|--------------------------------------------|-----------|-------|-----------|-------|-----------|-------|-----------|-------|-----------|-------|
|                                            | Mean      | SE    |
| <b>Treatment effects</b>                   |           |       |           |       |           |       |           |       |           |       |
| <i>Poor(ref)</i>                           | -4.874*** | 0.466 | -3.352*** | 0.302 | -4.319*** | 0.439 | -3.894*** | 0.365 | -4.340*** | 0.429 |
| <i>Moderate</i>                            | 0.059     | 0.155 | -0.091    | 0.110 | -0.018    | 0.133 | -0.234*   | 0.118 | -0.180    | 0.122 |
| <i>Good</i>                                | 4.816***  | 0.452 | 3.443***  | 0.308 | 4.337***  | 0.438 | 4.128***  | 0.378 | 4.520***  | 0.440 |
| <b>Physician-patient communication</b>     |           |       |           |       |           |       |           |       |           |       |
| <i>Poor(ref)</i>                           | -0.692*** | 0.130 | -0.542*** | 0.104 | -0.659*** | 0.120 | -0.772*** | 0.116 | -0.780*** | 0.122 |
| <i>Moderate</i>                            | 0.038     | 0.098 | -0.102    | 0.080 | -0.021    | 0.087 | 0.019     | 0.083 | -0.045    | 0.082 |
| <i>Good</i>                                | 0.654***  | 0.121 | 0.644***  | 0.097 | 0.680***  | 0.110 | 0.752***  | 0.107 | 0.824***  | 0.113 |
| <b>Continuity of care</b>                  |           |       |           |       |           |       |           |       |           |       |
| <i>No(ref)</i>                             | -0.248*** | 0.075 | -0.236*** | 0.058 | -0.190**  | 0.065 | -0.313*** | 0.063 | -0.408*** | 0.067 |
| <i>Yes</i>                                 | 0.248***  | 0.075 | 0.236***  | 0.058 | 0.190**   | 0.065 | 0.313***  | 0.063 | 0.408***  | 0.067 |
| <b>Waiting time</b>                        |           |       |           |       |           |       |           |       |           |       |
| <i>4 hours or longer(ref)</i>              | -0.375*** | 0.114 | 0.469***  | 0.090 | -0.439*** | 0.104 | -0.434*** | 0.095 | -0.538*** | 0.098 |
| <i>2 hours</i>                             | 0.109     | 0.106 | 0.008     | 0.085 | -0.029    | 0.093 | 0.116     | 0.086 | 0.0004    | 0.085 |
| <i>Within 0.5 hour</i>                     | 0.266**   | 0.096 | 0.461***  | 0.082 | 0.468***  | 0.096 | 0.318***  | 0.082 | 0.537***  | 0.087 |
| <b>Travel time</b>                         |           |       |           |       |           |       |           |       |           |       |
| <i>6 hours or longer(ref)</i>              | -1.763*** | 0.175 | -1.259*** | 0.127 | -1.204*** | 0.137 | -1.451*** | 0.139 | -1.727*** | 0.170 |
| <i>3 hours</i>                             | 0.253*    | 0.103 | 0.159*    | 0.080 | 0.136     | 0.087 | 0.206*    | 0.084 | 0.249**   | 0.082 |
| <i>Within 1 hour</i>                       | 1.510***  | 0.154 | 1.100***  | 0.114 | 1.068***  | 0.123 | 1.245***  | 0.122 | 1.477***  | 0.150 |
| <b>Out-of-pocket costs (if reimbursed)</b> |           |       |           |       |           |       |           |       |           |       |
| Cost (per CNY50)                           | -0.202*** | 0.031 | -0.167*** | 0.025 | -0.153*** | 0.028 | -0.168*** | 0.024 | -0.199*** | 0.028 |

| Interactions with demographics      | Income     |       | Age        |       | Comorbidities |       | Type of healthcare facilities |       | EQ-5D-5L index value |       |
|-------------------------------------|------------|-------|------------|-------|---------------|-------|-------------------------------|-------|----------------------|-------|
| Treatment effects                   |            |       |            |       |               |       |                               |       |                      |       |
| <i>Moderate</i>                     | -0.455*    | 0.204 | -0.334     | 0.188 | -0.348        | 0.191 | 0.056                         | 0.180 | -0.081               | 0.205 |
| <i>Good</i>                         | 0.406      | 0.275 | 2.839***   | 0.801 | 0.986*        | 0.442 | 0.898*                        | 0.452 | 1.748**              | 0.612 |
| Physician-patient communication     |            |       |            |       |               |       |                               |       |                      |       |
| <i>Moderate</i>                     | -0.201     | 0.128 | 0.133      | 0.126 | -0.070        | 0.130 | -0.156                        | 0.121 | 0.021                | 0.139 |
| <i>Good</i>                         | 0.377*     | 0.154 | 0.442*     | 0.183 | 0.272         | 0.155 | 0.102                         | 0.149 | 0.171                | 0.178 |
| Continuity of care                  |            |       |            |       |               |       |                               |       |                      |       |
| <i>Yes</i>                          | 0.185      | 0.101 | 0.232*     | 0.102 | 0.318**       | 0.108 | 0.045                         | 0.093 | -0.130               | 0.110 |
| Waiting time                        |            |       |            |       |               |       |                               |       |                      |       |
| <i>2 hours</i>                      | -0.137     | 0.139 | 0.017      | 0.136 | 0.143         | 0.136 | -0.193                        | 0.128 | 0.006                | 0.152 |
| <i>Within 0.5 hour</i>              | 0.396**    | 0.134 | 0.044      | 0.130 | 0.023         | 0.135 | 0.315*                        | 0.132 | -0.002               | 0.143 |
| Travel time                         |            |       |            |       |               |       |                               |       |                      |       |
| <i>3 hours</i>                      | -0.075     | 0.132 | 0.111      | 0.125 | 0.158         | 0.131 | -0.012                        | 0.125 | -0.039               | 0.133 |
| <i>within 1 hour</i>                | -0.121     | 0.159 | 0.533**    | 0.189 | 0.588**       | 0.176 | 0.144                         | 0.170 | -0.034               | 0.202 |
| Out-of-pocket costs (if reimbursed) |            |       |            |       |               |       |                               |       |                      |       |
| Cost (per CNY50)                    | 0.010      | 0.038 | -0.017     | 0.039 | -0.068        | 0.039 | -0.015                        | 0.037 | 0.002                | 0.042 |
| Log likelihood                      | -2271.4592 |       | -2283.4658 |       | -2278.9024    |       | -2289.7129                    |       | -2280.1412           |       |
| Participants                        | 703        |       | 703        |       | 703           |       | 703                           |       | 703                  |       |
| Observations                        | 11248      |       | 11248      |       | 11248         |       | 11248                         |       | 11248                |       |

Notes: Ref, reference. Monthly household income: CNY 4000 or less=0, Higher than CNY 4000=1; Age: Young or middle-aged (aged 64 or younger)=0, Elderly (aged 65 or older)=1; Comorbidities: No comorbidities=0, With comorbidities=1; The most frequently visited healthcare facilities: Community health centers=0, Secondary or tertiary hospitals=1; EQ-5D-5L index value: 0.85 and below=0, Higher than 0.85=1.

\*p<0.05; \*\*p<0.01; \*\*\*p<0.001

**STROBE 2007 (v4) checklist of items to be included in reports of observational studies in epidemiology\***  
**Checklist for cohort, case-control, and cross-sectional studies (combined)**

| Section/Topic             | Item # | Recommendation                                                                                                                                                                                                                                                                                                                                                                                                                                                         | Reported on page #                                               |
|---------------------------|--------|------------------------------------------------------------------------------------------------------------------------------------------------------------------------------------------------------------------------------------------------------------------------------------------------------------------------------------------------------------------------------------------------------------------------------------------------------------------------|------------------------------------------------------------------|
| Title and abstract        | 1      | (a) Indicate the study's design with a commonly used term in the title or the abstract                                                                                                                                                                                                                                                                                                                                                                                 | Page 2                                                           |
|                           |        | (b) Provide in the abstract an informative and balanced summary of what was done and what was found                                                                                                                                                                                                                                                                                                                                                                    | Page 3                                                           |
| <b>Introduction</b>       |        |                                                                                                                                                                                                                                                                                                                                                                                                                                                                        |                                                                  |
| Background/rationale      | 2      | Explain the scientific background and rationale for the investigation being reported                                                                                                                                                                                                                                                                                                                                                                                   | Page 5<br>Page 6 (line 4-32)                                     |
| Objectives                | 3      | State specific objectives, including any pre-specified hypotheses                                                                                                                                                                                                                                                                                                                                                                                                      | Page 6 (line 35-49)                                              |
| <b>Methods</b>            |        |                                                                                                                                                                                                                                                                                                                                                                                                                                                                        |                                                                  |
| Study design              | 4      | Present key elements of study design early in the paper                                                                                                                                                                                                                                                                                                                                                                                                                | Page 6 (line 57-60)<br>Page 8 (line 27-60)<br>Page 9 (line 4-26) |
| Setting                   | 5      | Describe the setting, locations, and relevant dates, including periods of recruitment, exposure, follow-up, and data collection                                                                                                                                                                                                                                                                                                                                        | Page 9 (line 51-53)<br>Appendix 4                                |
| Participants              | 6      | (a) <i>Cohort study</i> —Give the eligibility criteria, and the sources and methods of selection of participants. Describe methods of follow-up<br><i>Case-control study</i> —Give the eligibility criteria, and the sources and methods of case ascertainment and control selection. Give the rationale for the choice of cases and controls<br><i>Cross-sectional study</i> —Give the eligibility criteria, and the sources and methods of selection of participants | Page 9 (line 54-60)                                              |
|                           |        | (b) <i>Cohort study</i> —For matched studies, give matching criteria and number of exposed and unexposed<br><i>Case-control study</i> —For matched studies, give matching criteria and the number of controls per case                                                                                                                                                                                                                                                 | Not applicable                                                   |
| Variables                 | 7      | Clearly define all outcomes, exposures, predictors, potential confounders, and effect modifiers. Give diagnostic criteria, if applicable                                                                                                                                                                                                                                                                                                                               | Page 7<br>Page 8 (line 4-24)                                     |
| Data sources/ measurement | 8*     | For each variable of interest, give sources of data and details of methods of assessment (measurement). Describe comparability of assessment methods if there is more than one group                                                                                                                                                                                                                                                                                   | Page 9 (line 7-21)<br>Page 10 (line 22-34)                       |
| Bias                      | 9      | Describe any efforts to address potential sources of bias                                                                                                                                                                                                                                                                                                                                                                                                              | Page 9 (line 22-26)<br>Page 10 (line 4-20)                       |
| Study size                | 10     | Explain how the study size was arrived at                                                                                                                                                                                                                                                                                                                                                                                                                              | Page 9 (line 29-46)                                              |
| Quantitative variables    | 11     | Explain how quantitative variables were handled in the analyses. If applicable, describe which groupings were chosen and why                                                                                                                                                                                                                                                                                                                                           | Page 10 (line 55-60)<br>Page 11 (line 4-31)                      |

|                     |     |                                                                                                                                                                                                                                                                                                           |                                                           |
|---------------------|-----|-----------------------------------------------------------------------------------------------------------------------------------------------------------------------------------------------------------------------------------------------------------------------------------------------------------|-----------------------------------------------------------|
|                     |     |                                                                                                                                                                                                                                                                                                           | Page 12 (line 10-40)                                      |
| Statistical methods | 12  | (a) Describe all statistical methods, including those used to control for confounding                                                                                                                                                                                                                     | Page 11 (line 33-45)                                      |
|                     |     | (b) Describe any methods used to examine subgroups and interactions                                                                                                                                                                                                                                       | Page 11 (line 47-60)<br>Page 12 (line 4-8)                |
|                     |     | (c) Explain how missing data were addressed                                                                                                                                                                                                                                                               | Page 10 (line 10-15)                                      |
|                     |     | (d) <i>Cohort study</i> —If applicable, explain how loss to follow-up was addressed<br><i>Case-control study</i> —If applicable, explain how matching of cases and controls was addressed<br><i>Cross-sectional study</i> —If applicable, describe analytical methods taking account of sampling strategy | Not applicable                                            |
|                     |     | (e) Describe any sensitivity analyses                                                                                                                                                                                                                                                                     | Page 11 (line 47-60)<br>Page 12 (line 4-8)                |
| <b>Results</b>      |     |                                                                                                                                                                                                                                                                                                           |                                                           |
| Participants        | 13* | (a) Report numbers of individuals at each stage of study—eg numbers potentially eligible, examined for eligibility, confirmed eligible, included in the study, completing follow-up, and analysed                                                                                                         | Page 12 (line 46-60)                                      |
|                     |     | (b) Give reasons for non-participation at each stage                                                                                                                                                                                                                                                      | Not applicable                                            |
|                     |     | (c) Consider use of a flow diagram                                                                                                                                                                                                                                                                        | Not applicable                                            |
| Descriptive data    | 14* | (a) Give characteristics of study participants (eg demographic, clinical, social) and information on exposures and potential confounders                                                                                                                                                                  | Page 13 (line 10-60)<br>Page 14 (line 2-46)               |
|                     |     | (b) Indicate number of participants with missing data for each variable of interest                                                                                                                                                                                                                       | Not applicable                                            |
|                     |     | (c) <i>Cohort study</i> —Summarise follow-up time (eg, average and total amount)                                                                                                                                                                                                                          | Not applicable                                            |
| Outcome data        | 15* | <i>Cohort study</i> —Report numbers of outcome events or summary measures over time                                                                                                                                                                                                                       |                                                           |
|                     |     | <i>Case-control study</i> —Report numbers in each exposure category, or summary measures of exposure                                                                                                                                                                                                      |                                                           |
|                     |     | <i>Cross-sectional study</i> —Report numbers of outcome events or summary measures                                                                                                                                                                                                                        | Page 14 (line 51-60)<br>Page 15 (line 4-8)                |
| Main results        | 16  | (a) Give unadjusted estimates and, if applicable, confounder-adjusted estimates and their precision (eg, 95% confidence interval). Make clear which confounders were adjusted for and why they were included                                                                                              | Page 15 (line 9-52)<br>Page 16 (4-46)                     |
|                     |     | (b) Report category boundaries when continuous variables were categorized                                                                                                                                                                                                                                 | Not applicable                                            |
|                     |     | (c) If relevant, consider translating estimates of relative risk into absolute risk for a meaningful time period                                                                                                                                                                                          | Not applicable                                            |
| Other analyses      | 17  | Report other analyses done—eg analyses of subgroups and interactions, and sensitivity analyses                                                                                                                                                                                                            | Page 16 (line 48-60)<br>Page 17 (line 4-40)<br>Appendix 6 |
| <b>Discussion</b>   |     |                                                                                                                                                                                                                                                                                                           |                                                           |

1  
2  
3  
4  
5  
6  
7  
8  
9  
10  
11  
12  
13  
14  
15  
16  
17  
18  
19  
20  
21  
22  
23  
24  
25  
26  
27  
28  
29  
30  
31  
32  
33  
34  
35  
36  
37  
38  
39  
40  
41  
42  
43  
44  
45  
46

|                          |    |                                                                                                                                                                            |                                                   |
|--------------------------|----|----------------------------------------------------------------------------------------------------------------------------------------------------------------------------|---------------------------------------------------|
| Key results              | 18 | Summarise key results with reference to study objectives                                                                                                                   | Page 17 (line 45-60)<br>Page 18<br>Page 19 (4-38) |
| Limitations              | 19 | Discuss limitations of the study, taking into account sources of potential bias or imprecision. Discuss both direction and magnitude of any potential bias                 | Page 21 (line 49-60)                              |
| Interpretation           | 20 | Give a cautious overall interpretation of results considering objectives, limitations, multiplicity of analyses, results from similar studies, and other relevant evidence | Page 19 (line 40-60)<br>Page 20 (line 4-20)       |
| Generalisability         | 21 | Discuss the generalisability (external validity) of the study results                                                                                                      | Page 20 (line 22-60)<br>Page 21 (4-14)            |
| <b>Other information</b> |    |                                                                                                                                                                            |                                                   |
| Funding                  | 22 | Give the source of funding and the role of the funders for the present study and, if applicable, for the original study on which the present article is based              | Page 23 (line 30-44)                              |

\*Give information separately for cases and controls in case-control studies and, if applicable, for exposed and unexposed groups in cohort and cross-sectional studies.

**Note:** An Explanation and Elaboration article discusses each checklist item and gives methodological background and published examples of transparent reporting. The STROBE checklist is best used in conjunction with this article (freely available on the Web sites of PLoS Medicine at <http://www.plosmedicine.org/>, Annals of Internal Medicine at <http://www.annals.org/>, and Epidemiology at <http://www.epidem.com/>). Information on the STROBE Initiative is available at [www.strobe-statement.org](http://www.strobe-statement.org).

# BMJ Open

## Preferences for healthcare services among hypertension patients in China: a discrete choice experiment

|                                 |                                                                                                                                                                                                                                                                                                                                                                                                                                                                                                                                                                                                      |
|---------------------------------|------------------------------------------------------------------------------------------------------------------------------------------------------------------------------------------------------------------------------------------------------------------------------------------------------------------------------------------------------------------------------------------------------------------------------------------------------------------------------------------------------------------------------------------------------------------------------------------------------|
| Journal:                        | <i>BMJ Open</i>                                                                                                                                                                                                                                                                                                                                                                                                                                                                                                                                                                                      |
| Manuscript ID                   | bmjopen-2021-053270.R1                                                                                                                                                                                                                                                                                                                                                                                                                                                                                                                                                                               |
| Article Type:                   | Original research                                                                                                                                                                                                                                                                                                                                                                                                                                                                                                                                                                                    |
| Date Submitted by the Author:   | 05-Nov-2021                                                                                                                                                                                                                                                                                                                                                                                                                                                                                                                                                                                          |
| Complete List of Authors:       | Yu, Xiaolan; Nantong University Medical School, Department of Medical Informatics<br>Bao, Haini; Nantong University Medical School, Department of Medical Informatics<br>Shi, Jianwei; Shanghai Jiao Tong University School of Medicine, School of Public Health<br>Yuan, Xiaoyu; Affiliated Hospital of Nantong University, Department of Emergency Medicine<br>Qian, Liangliang; Pujiang Community Health Service Center<br>Feng, Zhe; Nantong University Medical School, Department of Medical Informatics<br>Geng, JinSong; Nantong University Medical School, Department of Medical Informatics |
| <b>Primary Subject Heading</b>: | Health services research                                                                                                                                                                                                                                                                                                                                                                                                                                                                                                                                                                             |
| Secondary Subject Heading:      | Health policy                                                                                                                                                                                                                                                                                                                                                                                                                                                                                                                                                                                        |
| Keywords:                       | Health policy < HEALTH SERVICES ADMINISTRATION & MANAGEMENT, HEALTH SERVICES ADMINISTRATION & MANAGEMENT, PUBLIC HEALTH, Hypertension < CARDIOLOGY                                                                                                                                                                                                                                                                                                                                                                                                                                                   |
|                                 |                                                                                                                                                                                                                                                                                                                                                                                                                                                                                                                                                                                                      |

SCHOLARONE™  
Manuscripts





I, the Submitting Author has the right to grant and does grant on behalf of all authors of the Work (as defined in the below author licence), an exclusive licence and/or a non-exclusive licence for contributions from authors who are: i) UK Crown employees; ii) where BMJ has agreed a CC-BY licence shall apply, and/or iii) in accordance with the terms applicable for US Federal Government officers or employees acting as part of their official duties; on a worldwide, perpetual, irrevocable, royalty-free basis to BMJ Publishing Group Ltd ("BMJ") its licensees and where the relevant Journal is co-owned by BMJ to the co-owners of the Journal, to publish the Work in this journal and any other BMJ products and to exploit all rights, as set out in our [licence](#).

The Submitting Author accepts and understands that any supply made under these terms is made by BMJ to the Submitting Author unless you are acting as an employee on behalf of your employer or a postgraduate student of an affiliated institution which is paying any applicable article publishing charge ("APC") for Open Access articles. Where the Submitting Author wishes to make the Work available on an Open Access basis (and intends to pay the relevant APC), the terms of reuse of such Open Access shall be governed by a Creative Commons licence – details of these licences and which [Creative Commons](#) licence will apply to this Work are set out in our licence referred to above.

Other than as permitted in any relevant BMJ Author's Self Archiving Policies, I confirm this Work has not been accepted for publication elsewhere, is not being considered for publication elsewhere and does not duplicate material already published. I confirm all authors consent to publication of this Work and authorise the granting of this licence.

# Preferences for healthcare services among hypertension patients in China: a discrete choice experiment

Xiaolan Yu<sup>1†</sup>, Haini Bao<sup>1†</sup>, Jianwei Shi<sup>2</sup>, Xiaoyu Yuan<sup>3</sup>, Liangliang Qian<sup>4</sup>, Zhe Feng<sup>1</sup>, Jinsong Geng<sup>1\*</sup>

<sup>1</sup> Department of Medical Informatics, Nantong University Medical School, Nantong, China

<sup>2</sup> School of Public Health, Shanghai Jiaotong University School of Medicine, Shanghai, China

<sup>3</sup> Department of Emergency Medicine, Affiliated Hospital of Nantong University, Nantong, China

<sup>4</sup> Pujiang Community Health Service Center, Shanghai, China

\*Correspondence: Jinsong Geng, Department of Medical Informatics, Nantong University Medical School, 19 Qixiu Road, Nantong, Jiangsu 226001, China; Email [gjs@ntu.edu.cn](mailto:gjs@ntu.edu.cn); Tel: +86 513 85051891; Fax: +86 513 85051876

<sup>†</sup>Xiaolan Yu and Haini Bao contributed equally to the research and should be considered as co-first authors.

Word count: 4626

## ABSTRACT

### Objectives

Our study aimed to support evidence-informed policy-making on patient-centered care by investigating preferences for healthcare services among hypertension patients.

### Design

We identified six attributes of healthcare services for a discrete choice experiment (DCE), and applied Bayesian-efficient design with blocking techniques to generate choice sets. After conducting the DCE, we used a mixed logit regression model to investigate patients' preferences for each attribute and analyzed the heterogeneities in preferences. Estimates of willingness to pay were derived from regression coefficients.

### Setting

The DCE was conducted in Jiangsu province and Shanghai municipality in China.

### Participants

Patients aged 18 years or older with a history of hypertension for at least two years and who took medications regularly were recruited.

### Results

Patients highly valued healthcare services that produced good treatment effects ( $\beta=4.502$ ,  $p<0.05$ ), followed by travel time to healthcare facilities within 1 hour ( $\beta=1.285$ ,  $p<0.001$ ), and the effective physician-patient communication ( $\beta=0.771$ ,  $p<0.001$ ). Continuity of care and minimal waiting time were also positive predictors ( $p<0.001$ ). However, the out-of-pocket cost was a negative predictor of patients' choice ( $\beta= -0.168$ ,  $p<0.001$ ). Older adults, patients with good health-related quality of life, had comorbidities, and who were likely to visit secondary and tertiary hospitals cared more about favorable effects ( $p<0.05$ ). Patients were willing to pay CNY 2,489 (95% CI 2,013-2,965) as long as the clinical benefits gained were substantial.

### Conclusions

Our findings highlight the importance of effective, convenient, efficient, coordinated, and patient-centered care for chronic diseases like hypertension. Policymakers and healthcare providers are suggested to work on aligning the service provision with patients' preferences.

**Keywords:** patients' preferences, healthcare services, discrete choice experiment, hypertension

## Strengths and limitations of this study

- The discrete choice experiment is a rigorous method that enables us to measure preferences for healthcare services among hypertension patients.
- Bayesian-efficient design with a blocking technique was applied to improve statistical efficiency as well as response efficiency.
- Comorbidities, past healthcare experience, and health-related quality of life were used as variables to observe preference heterogeneity and address evidence gaps.
- While this study explored the preferences among hypertension patients, future studies need to examine other types of chronic diseases.

## INTRODUCTION

Hypertension, also known as high blood pressure, is a condition in which the blood vessels have raised pressure persistently. Hypertension can damage the brain, heart, kidney, and arterial blood vessels. It is ranked as the leading cause of premature death and the most important modifiable risk factor for cardiovascular disease.<sup>1</sup> The prevalence of hypertension is high and continues to be rising in China in recent years. Among Chinese adults aged over 15 years, 18.14% have hypertension.<sup>2</sup> Despite huge efforts, the awareness, treatment, and control rate of hypertension remained extremely low, which were associated with substantial unnecessary disease burden and significant excess mortality.<sup>3-5</sup> Moreover, many hypertension patients have multiple comorbidities, which is associated with increased utilization of healthcare services and great financial burden to individuals and the health system.<sup>6,7</sup>

To optimize the allocation of healthcare resources and reach the goal of delivering high-standard healthcare services, since 2009, the Chinese government has vigorously promoted the implementation of the hierarchical medical system. Primary healthcare facilities like community health service centers are expected to offer affordable first-contact care, while secondary and tertiary hospitals provide specialist referral services. In the past decade, advances have been made by the Chinese government in achieving universal health coverage and providing financial protection for its citizens.<sup>8</sup> However, primary healthcare was underutilized, and the referral system was still practiced with poor effectiveness.<sup>9</sup>

Patients were more favorable to healthcare services in hospitals than primary healthcare facilities in China.<sup>10</sup> Individuals with better socioeconomic status and greater healthcare needs seemed to be less likely to utilize primary healthcare.<sup>11</sup> As a result, hospitals were overloaded, and the long waiting time became the major source of dissatisfaction.<sup>12</sup> On the contrary, an integrated delivery system based on primary healthcare is helpful to meet the needs of China's aging population that are facing an increased chronic disease burden.<sup>13</sup> Nevertheless, patients' preferences for

1  
2  
3  
4 hospital-based services for first-contact care place a huge obstacle to promoting  
5 community-based primary healthcare service.<sup>14</sup>  
6  
7

8 Understanding patients' preferences are particularly worthwhile when patient  
9 decisions are preference-sensitive, like the choice in healthcare services. Eliciting  
10 patients' preferences is a key element of patient-centered care. The discrete choice  
11 experiment (DCE) is a well-established quantitative approach to elicit stated  
12 preferences. Despite several DCEs being carried out to investigate patients'  
13 preferences for healthcare services, none of them involved patients with hypertension  
14 in China, one of the most common types of chronic diseases.<sup>15-19</sup>  
15  
16  
17  
18  
19  
20  
21

22 Although patient-reported outcomes, such as health-related quality of life  
23 (HRQoL) are essential measures of health status, whether patients' preferences on  
24 healthcare services differ from HRQoL remain unclear. Furthermore, preferences  
25 contain a learned component, and past experience might influence an individual's  
26 present choice.<sup>20 21</sup> We remain unclear about whether the healthcare facilities that  
27 patients usually visited in the past could have an impact on their current preferences  
28 for healthcare services.  
29  
30  
31  
32  
33  
34  
35

36 Due to the high prevalence, serious complications, and heavy burden,  
37 hypertension has become an important public health challenge. Effective and efficient  
38 healthcare services for hypertension patients are essential to successful disease  
39 control. Meanwhile, patients' demand for healthcare services varies according to the  
40 severity of the disease.<sup>22 23</sup> Therefore, we aim to fill the gap by measuring preferences  
41 of healthcare services for first-contact care among hypertension patients, thus  
42 supporting evidence-informed policy-making to address the problems of inappropriate  
43 healthcare service utilization. Specifically, we conducted a DCE to test the following  
44 hypotheses: (1) attributes regarding health benefits are more important than other  
45 attributes for patients' preferences of healthcare services for first-contact care; (2)  
46 patients' preferences differ by socio-demographic characteristics, feelings of health  
47 status (i.e. HRQoL), the severity of disease (i.e. comorbidities), and the prior  
48 experience of healthcare services.  
49  
50  
51  
52  
53  
54  
55  
56  
57  
58  
59  
60

## METHODS

### Identification of attributes and levels

Our DCE design, implementation, and analysis followed the user guide jointly developed by the World Bank, World Health Organization, and the U.S. Agency for International Development.<sup>24</sup> First, a literature search on February 10<sup>th</sup>, 2020, was conducted to identify attributes that were used in DCEs regarding preferences of healthcare services among patients with chronic diseases or chronic conditions. Twenty-seven studies were identified, with one DCE<sup>25</sup> conducted in the UK aimed to explore patients' preferences for the management of hypertension (Appendix 1). We found that the most commonly mentioned domains were the service provision capabilities (skills and attitudes of medical staff, accessibility of medicines and medical equipment, clinical benefits, environment, continuity of the care/coordination and continuity), service efficiency (waiting time for the appointment or treatment), affordability (costs or out-of-pocket costs for healthcare services), and convenience (travel time or distance from home to healthcare facilities) (Appendix 2). While in the DCE for preferences of hypertension patients<sup>25</sup>, there were four attributes including service provision capabilities (frequency of blood pressure measurement), clinical benefits (reduction in 5-year cardiovascular risk), affordability (at the macro level as measured by the annual cost to National Health Service in the UK), and model of care (as defined by types of personnel who was responsible for disease management).

Second, focus group discussions with physicians and hospital managers were carried out to determine the attributes and levels. According to their suggestions, although the expertise of healthcare professionals was found to be an important attribute for patients' preferences, benefit from healthcare was also indispensable. Effectiveness is one of the important domains in quality assessment measures.<sup>26 27</sup> The effectiveness of healthcare has been considered as the ultimate validator of the quality of care.<sup>28</sup> Furthermore, improvement in the effectiveness of healthcare service would be helpful to achieve population health improvement and health system

1  
2  
3 sustainability.<sup>29</sup> Healthcare services that could bring health benefits usually had strong  
4 recommendations from experts.<sup>30-32</sup> As shown in guidelines on management and  
5 control of hypertension, getting blood pressure under control and reducing the risk of  
6 complications are the goals for hypertension treatment.<sup>33 34</sup> Therefore, we classified  
7 the levels of treatment effects according to the control of blood pressure and  
8 complications.  
9

10  
11  
12  
13  
14  
15  
16  
17  
18  
19  
20  
21  
22  
23  
24  
25  
26  
27  
28  
29  
30  
31  
32  
33  
34  
35  
36  
37  
38  
39  
40  
41  
42  
43  
44  
45  
46  
47  
48  
49  
50  
51  
52  
53  
54  
55  
56  
57  
58  
59  
60

Continuity of care is a necessary part of the framework on integrated people-centered health services proposed by the World Health Organization.<sup>35</sup> Continuity of care was correlated with increased patient satisfaction, and effective physician-patient communication was regarded as a central clinical function.<sup>36 37</sup> Traditionally, a continuous caring relationship with the same healthcare professionals was found in previous DCEs.<sup>38-42</sup> However, for providers in vertically integrated healthcare systems, the contrasting ideal is the delivery of a 'seamless service'.<sup>43</sup> Similarly, multidisciplinary care became an attribute in a DCE that measured preferences for urban integrated primary care among type 2 diabetes patients.<sup>44</sup> As a result, we defined continuity of care as the healthcare facility operating in a well-functioning care delivery system, which could provide coordinated healthcare services for patients.<sup>43</sup>

Attributes and levels of healthcare services that were used in our DCE were shown in Table 1. Details of the explanation of attributes and levels were listed in Appendix 3. Our research objective was to identify the healthcare service attributes and levels that were preferred by hypertension patients, not the grade of hospitals (i.e. primary, secondary, tertiary). Hence, the scenarios in our DCE were not restricted to a specific grade of hospitals.



**Table 1. Attributes and levels of healthcare services in the DCE**

| Domains       | Attributes                                    | Levels                                      | Variables coding |
|---------------|-----------------------------------------------|---------------------------------------------|------------------|
| Capabilities  | Treatment effects                             | Good; Moderate; Poor                        | Categorical      |
|               | Physician-patient communication               | Good; Moderate; Poor                        | Categorical      |
|               | Continuity of care                            | Yes; No                                     | Categorical      |
| Efficiency    | Waiting time                                  | Within 0.5 hour; 2 hours; 4 hours or longer | Categorical      |
| Affordability | Out-of-pocket costs per visit (if reimbursed) | CNY 150 to 600                              | Continuous       |
| Convenience   | Travel time                                   | Within 1 hour; 3 hours; 6 hours or longer   | Categorical      |

Note: The average exchange rate of US Dollars to Chinese Yuan (CNY) in 2020 was about 6.90. Therefore, CNY 150 was approximately US\$21.7 and CNY 600 was about US\$87.0.

## Experimental design and development of the questionnaire

We used Ngen1.2 software (Choice-Metrics, Sydney, Australia) to conduct the D-efficiency experimental design. After obtaining priors of the attributes and levels from the pilot, the Bayesian-efficient design was used to create the formal choice sets, which comprised 48 pairs of scenarios and were divided into six blocks, with eight pairs in each block. Blocking design boosted response efficiency by reducing the cognitive burden on respondents.<sup>45</sup>

We applied unlabeled DCE, which had been widely used to investigate public preferences for healthcare.<sup>16-18 46-48</sup> Respondents in unlabeled DCEs found that they were not subject to the psychological cues of the labels, thus reflecting the real-life choice.<sup>49 50</sup> Also, in our research, we did not investigate patients' preferences for specific types of healthcare facilities. Therefore, the unlabeled DCE was considered appropriate. When no option had a definitive advantage, it was assumed that an opt-out option could raise the probability of neutral responses, increasing the number of individuals that might choose the opt-out scenario.<sup>51-53</sup> While the forced-choice sets under preference uncertainty would favor options that were easier to justify and contributed to a lower likelihood of regret and error.<sup>54</sup> Consequently, forced-choice sets were used in our DCE. Examples of choice scenarios were shown in Appendix 4.

1  
2  
3  
4 The questionnaire included four parts. The first part consisted of patients'  
5 socio-demographic characteristics, past medical history, comorbidities, and healthcare  
6 experience (i.e. types of frequently visited healthcare facilities). The second part  
7 contained the DCE tasks. The third part was the items of EQ-5D-5L, which used a  
8 health-state classification system defining health in five dimensions, mobility,  
9 self-care, usual activities, pain/discomfort, and anxiety/depression.<sup>55</sup> Each of the five  
10 dimensions was classified into five levels of perceived problems, no problem, mild  
11 problems, moderate problems, severe problems, and unable to/extreme problems. The  
12 final part was the level of understanding and confidence when making the DCE  
13 choices. The score ranged from zero (worst case) to 10 (best case) (Appendix 5). We  
14 excluded the DCE questionnaires with an average score of less than eight to ensure  
15 the validity of the data.  
16  
17  
18  
19  
20  
21  
22  
23  
24  
25  
26

## 27 **Sample size**

28  
29  
30 There was no universal standard for the ideal sample size for DCEs.<sup>56</sup> A less  
31 efficient design might require a larger sample size, leading to increased costs.<sup>57</sup> We  
32 followed a rule-of-thumb<sup>58</sup> when determining sample size:  
33  
34  
35

$$36 \frac{nta}{c} \geq 500$$

37  
38 where n was the number of respondents, t was the number of tasks, a was the  
39 number of alternatives, and c was the largest number of levels for any attributes. We  
40 had six blocks of choice sets; as a result, the minimum sample size was 564.  
41  
42  
43  
44  
45  
46

## 47 **DCE implementation and data collection**

48  
49  
50 Our formal DCE was carried out from November 1<sup>st</sup> to December 31<sup>st</sup>, 2020, in  
51 Jiangsu province and Shanghai municipality. Both Jiangsu province and Shanghai  
52 belong to the Yangtze River Delta region, which is the largest urban agglomeration in  
53 China. In recent years, the integration of healthcare resources and services in the  
54 region has been listed in the Chinese government's agenda. Inclusion criteria were  
55 patients aged 18 years or older, with a history of hypertension for at least two years,  
56  
57  
58  
59  
60

1  
2  
3  
4 and who took medications regularly. Hypertension patients during pregnancy were  
5 excluded. Patients were recruited consecutively from nine healthcare facilities.  
6  
7

8 To ensure the validity and reliability of the survey, the DCE questionnaires were  
9 administrated through one-to-one, face-to-face interviews. Our interviewers consisted  
10 of eight medical interns and nine physicians. For quality assurance, we compiled a  
11 survey training manual and trained the interviewers before the experiment. The  
12 interviewers were required to check the completeness of each questionnaire  
13 immediately after it was completed. As long as any missing information, they had to  
14 ask patients to provide additional information. For patients who were illiterate or had  
15 blurred vision, the interviewers explained the meaning of the questionnaire item by  
16 item until the patients fully understood each item.  
17  
18  
19  
20  
21  
22  
23  
24

25 We proposed a hypothetical situation of poor blood pressure control and severely  
26 uncomfortable symptoms. Patients were asked to think carefully and make a trade-off  
27 between two types of services for their first-contact care. The duration of the survey  
28 ranged from 20 minutes to one hour. Patients were informed that participation in the  
29 survey was anonymous and voluntary, and their verbal and informed consent was  
30 obtained prior to the survey. We gave each patient a wrapped cotton towel as a gift  
31 (CNY 10, or US\$1.4).  
32  
33  
34  
35  
36  
37  
38  
39  
40

## 41 **Patient and public involvement**

42  
43

44 One hundred and eight patients participated in the pilot survey to provide  
45 feedback on the intelligibility and acceptability of the questionnaire. Responses from  
46 the patients contributed to a more apprehensible and concise description of the DCE  
47 questions. The patients engaged in the pilot were not involved in the formal survey.  
48 No patients took part in the recruitment of study participants or the carry out of the  
49 study.  
50  
51  
52  
53  
54

## 55 **Statistical Analysis**

56  
57  
58  
59  
60

Our DCE data analysis was based on the random-effects model.<sup>59</sup> In the random utility theory, the conventional utility function  $U$  consists of two parts: one is the determinism  $V$  containing the observable component, and the other is the random component  $\varepsilon$  representing the random error term with standard statistical properties.<sup>60</sup> Therefore, the utility of the individual  $i$  of alternative  $n$  is:

$$U_{in} = V_{in} + \varepsilon_{in} \quad (1)$$

According to equation (1), the probability of the respondent choosing designated healthcare services was simulated. The probability of choice was determined by the indirect utility function of the respondent  $i$  who choose  $j$  in the selection set  $s$ . It was assumed to be a linear and additive form, and its form was:

$$V_{ijs} = X_{ijs}\beta + \varepsilon_{ijs} \quad (2)$$

Where  $V_{ijs}$  represented the utility derived from a choice,  $X_{ijs}\beta$  was the utility component, and  $\varepsilon$  was the random component. The  $X_{ijs}\beta$  was specified below, where  $\beta_{1-6}$  represented reference scores of attributes and  $\beta_0$  was the constant:

$$X_{ijs}\beta_j = \beta_0 + \beta_1 \text{Treatment effects}_j + \beta_2 \text{Physician - patient communication}_j + \beta_3 \text{Continuity of care}_j + \beta_4 \text{Waiting time}_j + \beta_5 \text{Travel time}_j + \beta_6 \text{Out - of - pocket costs}_j \quad (3)$$

We implemented the above equation by mixed logit regression using STATA 14.2 SE (STATA Corp LLC, College Station, Texas, USA) and was specified with 500 Halton draws. The mixed logit model allows for unknown heterogeneity in individual preferences. We assumed that all variables of the attributes had a random component and that the weights of preference were normally distributed.<sup>61</sup> The choice of patients was the dependent variable, and the selected attributes were independent variables.

Respondents' characteristics are likely to influence their decisions, but they are neither part of the choice alternatives nor a direct source of utility. One way to investigate how respondents' characteristics affect their choices is to include interaction terms between attributes and individuals' characteristics, allowing weights

of the attributes to vary with characteristics.<sup>62</sup> Therefore, we extended the main effects model with interaction terms between attribute levels and the factors likely to influence patients' choices. The interaction terms were specified as random parameters to keep suitable computation times. To assess whether preferences varied, we performed  $\chi^2$  tests for joint significance. Standard errors were clustered at the respondent level during the analysis.

Effects coding was used for categorical variables in DCE data. For effects coding, the mean effect for each attribute was normalized at zero, rather than all the reference categories being set to zero.<sup>63</sup> Each coefficient was estimated relative to the mean attribute effect.<sup>63</sup> The marginal rate of substitution (MRS) between attributes could be obtained by calculating the ratio of the partial derivatives of each attribute, where  $\beta$  was the coefficient of the attribute.

$$MRS = -\frac{\beta_a}{\beta_b} \quad (4)$$

Since our DCE attributes included costs, it could be used to generate an estimate of willingness to pay (WTP) of attributes expressed as in the unit of cost by replacing the denominator with the  $\beta$  estimate for the cost attribute. According to the estimated preference scores for each attribute level, WTP for changing attribute A from level 1 to level 2 could be calculated as follows:

$$WTP = -\frac{\beta_{A2} - \beta_{A1}}{\beta_{cost}} \quad (5)$$

where  $\beta_{cost}$  was the preference score of out-of-pocket costs, and  $\beta_{A1}$  and  $\beta_{A2}$  were preference scores of level 1 and level 2 for the attribute A respectively.

## RESULTS

### Patients' characteristics

A total of 722 hypertension patients were consented to participate in our DCE survey. 19 patients were excluded from the analysis due to non-compliance with the inclusion criteria, incomplete data, lack of understanding and confidence in making

the DCE choices. As a result, data from 703 patients were available for analysis. Two hundred and seven patients (29.45%) were enrolled from primary healthcare facilities, 247 (35.13%) from secondary hospitals, and 249 (35.42%) from tertiary hospitals. For details about the number of patients in each sampled hospital, please refer to Appendix 6. On average, patients found it easy to understand the scenarios (8.23, 95%CI 8.18-8.27), and confident in their choice (8.99, 95%CI 8.92-9.05).

Table 2 summarized the socio-demographic and clinical characteristics of patients. The sample had more males than females (56.90% vs. 43.10%). The average age was 64.66 years old (ranging from 24 to 96 years old). 38.26% of the monthly household income was less than CNY 4,000. 416 patients (59.17%) had comorbidities, and cardiovascular disease (191 patients) was the most common type (Appendix 7). Only 47.80% of patients considered primary healthcare facilities as their first choice, and only 26.17% of patients had contract service with general practitioners.

**Table 2. Characteristics of patients (N=703)**

| Variables                                   | N (%)       |
|---------------------------------------------|-------------|
| <b>Gender</b>                               |             |
| Male                                        | 400 (56.90) |
| Female                                      | 303 (43.10) |
| <b>Age<sup>#</sup></b>                      |             |
| <65                                         | 308 (43.81) |
| 65-74                                       | 258 (36.70) |
| ≥75                                         | 137 (19.49) |
| <b>Education</b>                            |             |
| Primary school/ Unschooled                  | 337 (47.94) |
| Junior high school/ High school             | 279 (39.69) |
| Junior college or higher vocational college | 54 (7.68)   |
| Bachelor's degree or above                  | 33 (4.69)   |
| <b>Employment</b>                           |             |
| Farmer                                      | 278 (39.54) |
| Urban employee                              | 106 (15.08) |
| Freelancers                                 | 74 (10.53)  |
| Unemployed                                  | 22 (3.12)   |
| Retiree                                     | 223 (31.72) |

|                                                          |             |
|----------------------------------------------------------|-------------|
| <b>Type of public health insurance</b>                   |             |
| UEBMI                                                    | 272 (38.69) |
| URRBMI                                                   | 431 (61.31) |
| <b>Monthly household income (CNY)</b>                    |             |
| ≤2000                                                    | 126 (17.92) |
| 2001~4000                                                | 143 (20.34) |
| 4001~6000                                                | 130 (18.49) |
| 6001~8000                                                | 91 (12.95)  |
| 8001~10000                                               | 72 (10.24)  |
| 10001~12000                                              | 54 (7.68)   |
| >12000                                                   | 87 (12.38)  |
| <b>Duration after diagnosis of hypertension (years)</b>  |             |
| ≤10                                                      | 474 (67.43) |
| >10                                                      | 229 (32.57) |
| <b>Comorbidities</b>                                     |             |
| No                                                       | 287 (40.83) |
| Yes                                                      | 416 (59.17) |
| <b>The most frequently visited healthcare facilities</b> |             |
| Primary healthcare facilities                            | 336 (47.80) |
| Secondary hospitals                                      | 228 (32.43) |
| Tertiary hospitals                                       | 139 (19.77) |
| <b>Contract service with general practitioners</b>       |             |
| No                                                       | 519 (73.83) |
| Yes                                                      | 184 (26.17) |
| <b>EQ-5D-5L index value<sup>Δ</sup></b>                  |             |
| ≤0.85                                                    | 423 (60.17) |
| >0.85                                                    | 280 (39.83) |

Notes: UEBMI, Urban Employees Basic Medical Insurance; URRBMI, Urban-Rural Residents Basic Medical Insurance; CNY, Chinese yuan

#Patients were divided into three groups: young and middle-aged (younger than 65 years old), young-old elderly (aged 65-74), old-old elderly (aged 75 and older).<sup>64</sup>

<sup>Δ</sup>The utility index was derived from the Chinese value sets.<sup>65</sup>

## Model estimation of preferences

We found that patients valued healthcare services that generated good treatment effects ( $\beta=4.502$ ,  $p<0.05$ ), followed by travel time to healthcare facilities within 1 hour ( $\beta=1.285$ ,  $p<0.001$ ), and the adequate physician-patient communication ( $\beta=0.771$ ,  $p<0.001$ ) (Table 3). Minimal waiting time ( $\beta=0.447$ ,  $p<0.001$ ) and

continuity of care ( $\beta=0.321$ ,  $p<0.001$ ) were also positive predictors of patients' choice of healthcare services. While out-of-pocket cost was a negative predictor of patients' preferences ( $\beta= -0.168$ ,  $p<0.001$ ). The SD revealed coefficient heterogeneity in the random parameters of attributes. We excluded patient data from healthcare facilities in Shanghai to do the sensitivity analysis, and the statistical significance of attributes was stable (Appendix 8).

**Table 3. Estimates of the mixed logit model (N=703)**

| Attributes                                 | Mean (SE)         | SD (SE)          |
|--------------------------------------------|-------------------|------------------|
| <b>Treatment effects</b>                   |                   |                  |
| <i>Poor(ref)</i>                           | -4.299*** (0.348) |                  |
| <i>Moderate</i>                            | -0.204** (0.089)  | 0.824*** (0.160) |
| <i>Good</i>                                | 4.502* (0.357)    | 2.148*** (0.223) |
| <b>Physician-patient communication</b>     |                   |                  |
| <i>Poor(ref)</i>                           | -0.727*** (0.089) |                  |
| <i>Moderate</i>                            | -0.044 (0.061)    | -0.390** (0.147) |
| <i>Good</i>                                | 0.771*** (0.084)  | 0.657*** (0.116) |
| <b>Continuity of care</b>                  |                   |                  |
| <i>No(ref)</i>                             | -0.321*** (0.048) |                  |
| <i>Yes</i>                                 | 0.321*** (0.048)  | 0.318** (0.121)  |
| <b>Waiting time</b>                        |                   |                  |
| <i>4 hours or longer (ref)</i>             | -0.476*** (0.072) |                  |
| <i>2 hours</i>                             | 0.029 (0.063)     | -0.137 (0.225)   |
| <i>Within 0.5 hour</i>                     | 0.447*** (0.066)  | 0.351** (0.132)  |
| <b>Travel time</b>                         |                   |                  |
| <i>6 hours or longer (ref)</i>             | -1.490*** (0.122) |                  |
| <i>3 hours</i>                             | 0.205*** (0.061)  | 0.409*** (0.122) |
| <i>Within 1 hour</i>                       | 1.285*** (0.107)  | 0.952*** (0.111) |
| <b>Out-of-pocket costs (if reimbursed)</b> |                   |                  |
| Cost (per CNY50)                           | -0.168*** (0.020) | 0.198*** (0.033) |
| Log likelihood                             | -2299.4957        |                  |
| Observations                               | 11248             |                  |

Notes: The coefficient for the reference group was calculated as the negative sum of other coefficients.<sup>63</sup>

Ref, reference; SE, standard error; SD, standard deviation; HRQoL, Health-related quality of life; CNY, Chinese yuan; \* $p<0.05$ ; \*\* $p<0.01$ ; \*\*\* $p<0.001$



## Marginal willingness to pay

According to the average WTP (Table 4), we found that patients highly valued the magnitude of treatment effects. They would be willing to pay an extra CNY 2,489 for healthcare services to improve the effects from poor to good, while their WTP to increase the effects from poor to moderate was CNY 1,155. The WTPs for other attributes from high to low were as follows: travel time, satisfied physician-patient communication, minimum waiting time, moderate physician-patient communication, and moderate waiting time.

**Table 4. Marginal willingness to pay for each attribute (N=703)**

| Attributes                                       | WTP (95% CI)        |
|--------------------------------------------------|---------------------|
| <b>Treatment effects</b>                         |                     |
| <i>From poor to moderate</i>                     | 1155*** (927~1383)  |
| <i>From poor to good</i>                         | 2489*** (2013~2965) |
| <b>Physician-patient communication</b>           |                     |
| <i>From poor to moderate</i>                     | 191*** (113~270)    |
| <i>From poor to good</i>                         | 423*** (315~532)    |
| <b>Continuity of care</b>                        |                     |
| <i>From no to yes</i>                            | 184*** (122~247)    |
| <b>Waiting time</b>                              |                     |
| <i>From 4 hours or longer to 0.5-2 hours</i>     | 146*** (73~219)     |
| <i>From 4 hours or longer to within 0.5 hour</i> | 265*** (185~346)    |
| <b>Travel time</b>                               |                     |
| <i>From 6 hours or longer to 1-3 hours</i>       | 481*** (368~594)    |
| <i>From 6 hours or longer to within 1 hour</i>   | 783*** (615~950)    |

Notes: CNY, Chinese Yuan; \*\*\*p<0.001

## Preference heterogeneity

The impact of patients' characteristics on preferences for healthcare services was shown in Appendix 9. We tested for interactions of monthly household income levels with different attributes. Compared with low-income patients, those who had high income showed stronger preferences for good physician-patient communication ( $\beta=0.377$ ,  $p<0.05$ ) and minimum waiting time ( $\beta=0.396$ ,  $p<0.01$ ) (Model 1). The

1  
2  
3  
4 negative interaction term between income and moderate treatment effects showed that  
5 high-income patients valued the moderate effects to be less important than did  
6 low-income patients.  
7  
8  
9

10 Similarly, we tested for interactions of age with the attributes, with young or  
11 mid-aged patients as the reference category (Model 2). Four interaction terms were  
12 statistically significant: good treatment effects ( $\beta=2.839$ ,  $p<0.001$ ), shortest travel  
13 time ( $\beta=0.533$ ,  $p<0.01$ ), good physician-patient communication ( $\beta=0.442$ ,  $p<0.05$ ),  
14 and continuity of care ( $\beta=0.232$ ,  $p<0.05$ ).  
15  
16  
17  
18  
19

20 There were statistically significant interaction terms of comorbidities with three  
21 attributes. Patients who had comorbidities favored more in healthcare services that  
22 generated good treatment effects ( $\beta=0.986$ ,  $p<0.05$ ), required minimum travel time  
23 ( $\beta=0.588$ ,  $p<0.01$ ), and ensured continuity of care ( $\beta=0.318$ ,  $p<0.01$ ) (Model 3).  
24  
25  
26  
27  
28

29 Compared with patients who usually visited primary healthcare facilities, those  
30 who tended to seek healthcare services from secondary or tertiary hospitals expressed  
31 a stronger preference for good treatment effects ( $\beta=0.898$ ,  $p<0.05$ ) and minimum  
32 waiting time ( $\beta=0.351$ ,  $p<0.05$ ) (Model 4). Patients with higher HRQoL paid more  
33 attention to healthcare services that contributed to good treatment effects ( $\beta=1.748$ ,  
34  $p<0.01$ ) (Model 5).  
35  
36  
37  
38  
39  
40  
41

## 42 **DISCUSSION**

### 43 **Patients' preferences for healthcare services**

44  
45  
46  
47 To the best of our knowledge, this is the first DCE that systematically  
48 investigated the attributes influencing the choice of healthcare services for  
49 first-contact care among chronic disease patients like hypertension in China. An  
50 in-depth understanding of patients' perspectives on different healthcare service  
51 attributes is of global interest since it could inform the providing of appropriate  
52 healthcare that could improve patient satisfaction and service utilization.  
53  
54  
55  
56  
57  
58  
59

60 According to the estimated attribute-level coefficients, we found that the

1  
2  
3  
4 treatment effect was the most important attribute defining patients' preferences. Our  
5 results also showed that older adults, patients who had higher HRQoL, with  
6 comorbidities, and who usually visited secondary or tertiary hospitals to treat  
7 hypertension cared more about good treatment effects. The findings highlight the  
8 importance of taking effectiveness into account to improve patients' acceptance of  
9 primary healthcare services. However, the clinical experience of physicians<sup>15 17</sup> and  
10 types of healthcare professionals,<sup>16</sup> rather than treatment effects, were often used to  
11 reflect the capabilities of healthcare provision in previous studies. In fact, preferences  
12 for provider types, which involved gender, types of medical staff, job titles, and  
13 professional training experience, were complex and difficult to interpret.  
14  
15  
16  
17  
18  
19  
20  
21  
22

23  
24 Our findings demonstrated that the minimum travel time to the healthcare facility  
25 was the second most important attribute. The results were consistent with previous  
26 DCEs, as the respondents disliked traveling longer distances to the healthcare  
27 providers.<sup>16 44</sup> Patients who were older and those who had comorbidities might feel  
28 inconvenient to travel a long distance for the first-contact care and rated shortest  
29 travel time to be more important than the counterparts.  
30  
31  
32  
33  
34  
35

36  
37 Continuity of care was concerned with the quality of care over time. In our study,  
38 continuity of care was defined as coordinated and patient-centered care. It is a process  
39 involving the orderly, uninterrupted movement of patients among the diverse  
40 elements of the service delivery system.<sup>43</sup> We found that patients desired healthcare  
41 services that were consistent and coordinated according to their health needs. In  
42 addition, the continuity of care was considered even more important for older patients  
43 and patients who had comorbidities. They needed more health resources than other  
44 groups, and their choices of first-contact care should be paid more attention to.  
45  
46  
47  
48  
49  
50  
51

52  
53 We found that good physician-patient communication was also an important  
54 attribute preferred by patients. In fact, effective physician-patient communication is  
55 essential in healthcare, affecting the patients' compliance with recommendations for  
56 care.<sup>66</sup> Physician-patient communication is a powerful indicator of healthcare quality  
57 that can determine patients' self-management behavior and satisfaction with  
58  
59  
60

1  
2  
3  
4 healthcare providers.<sup>67 68</sup> This is shown by greater patient involvement and decisions  
5 are reached through shared decision-making.<sup>69</sup> Our analyses revealed that  
6 high-income and older patients valued good physician-patient communication more  
7 than did lower-income and younger groups.  
8  
9  
10

11  
12 Longer waiting time and increased out-of-pocket costs were significant, negative  
13 predictors for the entire sample, showing that patient preferences decreased as the  
14 waiting time and out-of-pocket costs increased. Similar results were noted in DCEs  
15 eliciting public preferences for the choice of healthcare providers.<sup>47 50</sup> In addition, we  
16 found high-income patients and those who were likely to visit secondary or tertiary  
17 hospitals concerned more about waiting time. As shown in the previous study  
18 conducted in a Chinese public tertiary hospital, the reduced waiting time led to  
19 increased patient satisfaction.<sup>70</sup> Patients might have an increased willingness to pay  
20 for services that require less waiting time for an appointment to diagnose or treat,  
21 especially in the case of severe symptoms.<sup>71</sup>  
22  
23  
24  
25  
26  
27  
28  
29  
30

### 31 **Implications of the study findings**

32  
33  
34 In China, patients sought first-contact care in a disorderly manner, and the  
35 gate-keeping role of primary healthcare has not been fully implemented.<sup>72</sup> Patients'  
36 preferences should be known to guide the delivery of appropriate, effective, and  
37 efficient care. Our research confirms that the ideal healthcare services that meet  
38 hypertension patients' demands for first-contact care comprise the following  
39 attributes: produce good treatment effects, closer to home, offer good  
40 physician-patient communication, need short waiting time, ensure continuity of care  
41 and require low out-of-pockets per visit.  
42  
43  
44  
45  
46  
47  
48  
49  
50

51 The treatment effect was the most important attribute to attract patients. Patients  
52 were more likely to choose the healthcare services that led to the experience of good  
53 quality. It is worth noting that older patients, patients who had high HRQoL, patients  
54 with comorbidities, and those who tended to visit secondary or tertiary hospitals  
55 would pay special attention to treatment effects. Meanwhile, patients expect to  
56  
57  
58  
59  
60

1  
2  
3  
4 communicate with physicians to deliberate and express their preferences and views  
5 during the clinical decision-making process. Furthermore, older patients who are  
6 emotionally vulnerable and socially isolated are particularly in need of the emotional,  
7 social, and practical support that sensitive physician-patient communication can  
8 provide.<sup>73</sup>  
9  
10  
11  
12

13  
14 Evidence of variations in the perceived utility of healthcare services among  
15 patients emphasizes the importance of taking individual patient preferences into  
16 account to address the problems of inadequate primary healthcare service utilization  
17 and the ineffectiveness of the two-way referral mechanism. Healthcare systems need  
18 to be adaptable enough to offer patients choices to account for heterogeneity in  
19 patients' preferences.  
20  
21  
22  
23  
24  
25

26 Our study highlights the importance of improved service quality, timely access,  
27 and shared decision-making for the first-contact care of chronic diseases like  
28 hypertension. The improvement of service quality, physician-patient communication,  
29 and continuity of care will contribute to patients' preference to choose primary  
30 healthcare facilities as the first-contact care. Our findings were consistent with the  
31 optimal healthcare delivery strategies to achieve universal health coverage, which  
32 involves providing effective, safe, people-centered care that is timely, equitable,  
33 integrated, and efficient.<sup>74</sup>  
34  
35  
36  
37  
38  
39  
40  
41  
42

43 The quality of primary healthcare in China needed to be strengthened, and  
44 evidence-based monitoring and evaluation of the service quality are crucial for  
45 attaining the goals of healthcare system reform.<sup>72</sup> In addition to education for the  
46 general practitioners, the Chinese government could consider tailoring continuing  
47 training for the primary healthcare workforce.<sup>75</sup> Shared decision-making is  
48 appropriate for clinical decisions involving multiple reasonable options,<sup>76</sup> such as the  
49 management of chronic diseases. To improve the physicians' communication skills,  
50 strictly planned, culturally competent, effectively implemented, and rigorously  
51 evaluated trainings are required.<sup>77</sup> Care coordination approaches should also be  
52 advocated to engage patients in decision-making, support effective management of  
53  
54  
55  
56  
57  
58  
59  
60

1  
2  
3  
4 comorbidities, and ensure accessibility to interventions. Furthermore, the primary  
5 healthcare-based integrated delivery system in China should be strengthened.<sup>13</sup>  
6  
7

## 8 **Strengths and limitations**

9

10  
11 Our DCE provides valuable information about how patients weigh their  
12 first-contact care options and trade-off different healthcare service features. A better  
13 understanding of patients' preferences will guide the future development of the  
14 two-way referral mechanism, as policymakers aim to bridge the gap between the  
15 optimal models for patient-centered service delivery and patients' first-contact care  
16 needs.  
17  
18  
19  
20  
21  
22

23 The major contributions of our study are as follows. First, we used a DCE which  
24 followed good research practices, offering the advantage to explore the trade-offs  
25 between attributes of healthcare services. Second, the Bayesian-efficient design was  
26 applied to increase the statistical efficiency of the choice sets design, and a blocking  
27 technique was used to increase the response efficiency of patients. Third, we derived  
28 WTP estimates in hypothetical settings among patients with chronic diseases like  
29 hypertension. Fourth, this is the most comprehensive study that identifies preference  
30 heterogeneity according to age, income, HRQoL, comorbidities, and past healthcare  
31 service experience.  
32  
33  
34  
35  
36  
37  
38  
39  
40

41 Our study has several limitations. First, the DCE results are not representative of  
42 all patients with chronic diseases, because we only explored the preferences among  
43 hypertension patients to ensure the homogeneity of patients. Future studies need to  
44 enroll patients with other types of chronic diseases and identify variations in patients'  
45 preferences across different subgroups. Second, our samples were from Jiangsu and  
46 Shanghai, which stand for the most economically developed regions in China. Future  
47 studies should have a nationally representative sample by including the economically  
48 underdeveloped regions. Meanwhile, evenly distribution of sampled healthcare  
49 facilities in each region should be ensured. Third, given the limited number of  
50 attributes and levels tested in DCE, it might not represent complex real-life situations.  
51  
52  
53  
54  
55  
56  
57  
58  
59  
60

To further understand the relationship between stated (those elicited in the DCE) and revealed preferences (actual first-contact care-seeking behavior), studies are warranted to investigate if and how patients' preferences in healthcare services impact their long-term clinical outcomes. Finally, we only used comorbidity to represent disease progression and severity. Researches are suggested to evaluate variations of patients' preferences at different stages of the disease.

## CONCLUSION

Our DCE provides evidence about how hypertension patients value the attributes of healthcare services, including the capabilities, efficiency, affordability, and convenience of service provision, in the context of chaotic first-contact care-seeking behavior in China. The findings underline the importance of effective, convenient, efficient, coordinated, and patient-centered care for chronic diseases like hypertension. We also found preference heterogeneity that is correlated with patients' socio-demographic characteristics, feelings of health conditions, the severity of disease (i.e. comorbidities), and the prior experience of healthcare services. Policymakers and healthcare providers are suggested to work on aligning the service provision with patients' preferences, thus promoting the rational utilization of healthcare resources.

## Ethics approval

This study, including the patient consent process, has been approved by the Medical Ethics Committee in Nantong University (Ethical Approval-202054) and conforms to the ethical guidelines of the Declaration of Helsinki.

## Acknowledgments

We acknowledge the contributions made by our interviewers who did one-to-one, face-to-face interviews with the patients. We are grateful to the patients for their time and efforts. We sincerely thank the reviewers for providing valuable comments and suggestions on the manuscript.

1  
2  
3  
4 We acknowledge the guidance from Professor Hao Yu from Harvard Medical  
5 School and Harvard Pilgrim Healthcare Institute on the research design. At the time of  
6 drafting the research protocol, Jinsong Geng was a fellow at the Fellowship in Health  
7 Policy and Insurance Research, Department of Population Medicine, Harvard Medical  
8 School and Harvard Pilgrim Healthcare Institute.  
9  
10  
11  
12

### 13 14 **Author contributions**

15  
16  
17 Geng JS, Yu XL, and Bao HN led the design and analysis of the discrete choice  
18 experiment. Shi JW and Yuan XY contributed to the literature search and data  
19 interpretation. Yu XL, Qian LL, and Feng Z contributed to implementing the discrete  
20 choice experiment. Yu XL, Bao HN, and Geng JS performed the statistical analysis  
21 and wrote the manuscript.  
22  
23  
24  
25  
26

### 27 28 **Funding**

29  
30 This work was supported by the MOE (Ministry of Education in China) Project  
31 of Humanities and Social Sciences (Grant No. 21YJAZH023), National Natural  
32 Science Foundation of China (Grant No. 71603138), Science and Technology Project  
33 of Nantong City (Grant No. MS12021064), Nantong Municipal Health Commission  
34 (Grant No. 2020JCC003), and Key Project of Technology Innovation Think Tanks in  
35 Nantong (Grant No. CXZK202002). The funders provided financial support for the  
36 conduct of the study. The funders had no role in the design, implementation, data  
37 collection and statistical analysis, data interpretation, or writing of the manuscript.  
38  
39  
40  
41  
42  
43  
44  
45  
46

### 47 48 **Disclosure**

49 The authors report no conflict of interest in this research.  
50  
51

### 52 53 **Data sharing statement**

54 Data will be available upon reasonable request to the corresponding author.  
55  
56  
57  
58  
59  
60



## References

1. Yusuf S, Joseph P, Rangarajan S, *et al*. Modifiable risk factors, cardiovascular disease, and mortality in 155 722 individuals from 21 high-income, middle-income, and low-income countries (pure): a prospective cohort study. *Lancet* 2020;395(10226):795-808.
2. National Health Commission of the People's Republic of China. *China Health Statistics Yearbook*. Beijing: National Health Commission of the People's Republic of China 2020:239-240.
3. Mahajan S, Feng F, Hu S, *et al*. Assessment of prevalence, awareness, and characteristics of isolated systolic hypertension among younger and middle-aged adults in China. *JAMA Netw Open* 2020;3(12):e209743.
4. Wang Z, Chen Z, Zhang L, *et al*. Status of hypertension in china: results from the China hypertension survey, 2012-2015. *Circulation* 2018;137(22):2344-56.
5. Lu J, Lu Y, Wang X, *et al*. Prevalence, awareness, treatment, and control of hypertension in China: data from 1.7 million adults in a population-based screening study (China PEACE Million Persons Project). *Lancet* 2017;390(10112):2549-58.
6. Wong MC, Wang HH, Cheung CS, *et al*. Factors associated with multimorbidity and its link with poor blood pressure control among 223,286 hypertensive patients. *Int J Cardiol* 2014;177(1):202-8.
7. Gu S, Hu H, Dong H. Systematic review of the economic burden of pulmonary arterial hypertension. *Pharmacoeconomics* 2016;34(6):533-50.
8. Tao W, Zeng Z, Dang H, *et al*. Towards universal health coverage: lessons from 10 years of healthcare reform in China. *BMJ Glob Health* 2020;5(3):e002086.
9. Li M, Zhang Y, Lu Y, *et al*. Factors influencing two-way referral between hospitals and the community in China: a system dynamics simulation model. *Simulation* 2017;94(9):765-82.
10. Ta Y, Zhu Y, Fu H. Trends in access to health services, financial protection and satisfaction between 2010 and 2016: has China achieved the goals of its health system reform? *Soc Sci Med* 2020;245:112715.
11. Zhang A, Nikoloski Z, Albala SA, *et al*. Patient choice of health care providers in China: primary care facilities versus hospitals. *Health Syst Reform* 2020;6(1):e1846844.
12. Sun J, Hu G, Ma J, *et al*. Consumer satisfaction with tertiary healthcare in China: findings from the 2015 China national patient survey. *Int J Qual Health Care* 2017;29(2):213-21.
13. Yip W, Fu H, Chen AT, *et al*. 10 years of health-care reform in China: progress and gaps in universal health coverage. *Lancet* 2019;394(10204):1192-204.
14. Wu D, Lam TP, Lam KF, *et al*. Health reforms in china: the public's choices for first-contact care in urban areas. *Fam Pract* 2017;34(2):194-200.
15. Miners AH, Llewellyn CD, Cooper VL, *et al*. A discrete choice experiment to assess people living with HIV's (PLWHIV's) preferences for GP or HIV clinic appointments. *Sex Transm Infect* 2017;93(2):105-11.
16. Wong SF, Norman R, Dunning TL, *et al*. A discrete choice experiment to examine the preferences of patients with cancer and their willingness to pay for different types of health care appointments. *J Natl Compr Canc Netw* 2016;14(3):311-9.
17. O'Hara NN, Slobogean GP, Mohammadi T, *et al*. Are patients willing to pay for total

- 1  
2  
3  
4  
5  
6  
7  
8  
9  
10  
11  
12  
13  
14  
15  
16  
17  
18  
19  
20  
21  
22  
23  
24  
25  
26  
27  
28  
29  
30  
31  
32  
33  
34  
35  
36  
37  
38  
39  
40  
41  
42  
43  
44  
45  
46  
47  
48  
49  
50  
51  
52  
53  
54  
55  
56  
57  
58  
59  
60
- shoulder arthroplasty? evidence from a discrete choice experiment. *Can J Surg* 2016;59(2):107-12.
18. Zanolini A, Sikombe K, Sikazwe I, *et al*. Understanding preferences for HIV care and treatment in Zambia: evidence from a discrete choice experiment among patients who have been lost to follow-up. *PLoS Med* 2018;15(8):e1002636.
19. Zhu J, Li J, Zhang Z, *et al*. Patients' choice and preference for common disease diagnosis and diabetes care: a discrete choice experiment. *Int J Health Plann Manage* 2019;34(4):e1544-55.
20. Dolan P, Tsuchiya A. Health priorities and public preferences: the relative importance of past health experience and future health prospects. *J Health Econ* 2005;24(4):703-14.
21. Garland SN, Eriksen W, Song S, *et al*. Factors that shape preference for acupuncture or cognitive behavioral therapy for the treatment of insomnia in cancer patients. *Support Care Cancer* 2018;26(7):2407-15.
22. van Oostveen CJ, Gouma DJ, Bakker PJ, *et al*. Quantifying the demand for hospital care services: a time and motion study. *BMC Health Serv Res* 2015;15:15.
23. Wellay T, Gebreslassie M, Mesele M, *et al*. Demand for health care service and associated factors among patients in the community of Tsegedie District, Northern Ethiopia. *BMC Health Serv Res* 2018;18(1):697.
24. Organization WH. *How to conduct a discrete choice experiment for health workforce recruitment and retention in remote and rural areas: a user guide with case studies*. Geneva: World Health Organization 2012:1-94
25. Fletcher B, Hinton L, McManus R, *et al*. Patient preferences for management of high blood pressure in the UK: a discrete choice experiment. *Br J Gen Pract* 2019;69(686):e629-37.
26. Institute of Medicine Committee (US) on Quality of Health Care in America. *Crossing the quality chasm: a new health system for the 21st century*. Washington (DC): National Academies Press 2001.
27. Jahanmehr N, Rashidian A, Khosravi A, *et al*. A conceptual framework for evaluation of public health and primary care system performance in Iran. *Glob J Health Sci* 2015;7(4):341-57.
28. Donabedian A. Evaluating the quality of medical care. 1966. *Milbank Q* 2005;83(4):691-729.
29. Fineberg HV. Shattuck Lecture. A successful and sustainable health system--how to get there from here. *New Engl J Med* 2012;366(11):1020-7.
30. Hua Q, Fan L, Li J, *et al*. 2019 Chinese guideline for the management of hypertension in the elderly. *J Geriatr Cardiol* 2019;16(2):67-99.
31. Joint Committee for Guideline Revision. 2018 Chinese guidelines for prevention and treatment of hypertension—a report of the revision committee of Chinese guidelines for prevention and treatment of hypertension. *J Geriatr Cardiol* 2019;16(3):182-241.
32. World Health Organization. *Guideline for the pharmacological treatment of hypertension in adults*. Geneva: World Health Organization 2021:5-6.
33. National Institute for Health and Care Excellence. *Hypertension in adults: diagnosis and management*. London: National Institute for Health and Care Excellence 2019.
34. The National Essential Public Health Service Program Office for Management of

- Hypertension in Primary Health Care, National Center for Cardiovascular Diseases, National Committee on Hypertension Management in Primary Health Care. National clinical practice guidelines on the management of hypertension in primary health care in China. *Chinese J of Fron of Medi Sci* 2021;13(4):26-37.
35. World Health Organization. *Continuity and coordination of care: a practice brief to support implementation of the WHO Framework on integrated people-centred health services*. Geneva: World Health Organization 2018:9-22.
36. Health Quality Ontario. Continuity of care to optimize chronic disease management in the community setting: an evidence-based analysis. *Ont Health Technol Assess Ser* 2013;13(6):1-41.
37. Ha JF, Longnecker N. Doctor-patient communication: a review. *Ochsner J* 2010;10(1):38-43.
38. Ratcliffe J, Van Haselen R, Buxton M, *et al*. Assessing patients' preferences for characteristics associated with homeopathic and conventional treatment of asthma: a conjoint analysis study. *Thorax* 2002;57(6):503-8.
39. Michela T, Panagiotis P, George S, *et al*. Improving quality care for diabetes in the community: what do cypriot patients want? *Int J Qual Health Care* 2018;30(6):443-9.
40. Whitty JA, Stewart S, Carrington MJ, *et al*. Patient preferences and willingness-to-pay for a home or clinic based program of chronic heart failure management: findings from the which? trial. *PLoS One* 2013;8(3): e58347.
41. Albada A, Triemstra M. Patients' priorities for ambulatory hospital care centres. a survey and discrete choice experiment among elderly and chronically ill patients of a Dutch hospital. *Health Expect* 2009;12(1):92-105.
42. Ryan M, Bate A, Eastmond CJ, *et al*. Use of discrete choice experiments to elicit preferences. *Qual Health Care* 2001;10 (S1):i55-60.
43. Gulliford M, Naithani S, Morgan M. What is 'continuity of care'? *J Health Serv Res Policy* 2006;11(4):248-50.
44. Wang X, Song K, Zhu P, *et al*. How do type 2 diabetes patients value urban integrated primary care in China? results of a discrete choice experiment. *Int J Environ Res Public Health* 2019;17(1):117.
45. Reed Johnson F, Lancsar E, Marshall D, *et al*. Constructing experimental designs for discrete-choice experiments: report of the ISPOR conjoint analysis experimental design good research practices task force. *Value Health* 2013;16(1):3-13.
46. Beam NK, Dadi GB, Rankin SH, *et al*. A discrete choice experiment to determine facility-based delivery services desired by women and men in rural Ethiopia. *BMJ Open* 2018;8(4):e016853.
47. Liu Y, Kong Q, de Bekker-Grob EW. Public preferences for health care facilities in rural China: a discrete choice experiment. *Soc Sci Med* 2019;237:112396.
48. Bahrapour M, Bahrapour A, Amiresmaili M, *et al*. Hospital service quality - patient preferences - a discrete choice experiment. *Int J Health Care Qual Assur* 2018;31(7):676-83.
49. Kløjgaard ME, Bech M, Søgaard R. Designing a stated choice experiment: the value of a qualitative process. *J Choice Model* 2012;5(2):1-18.
50. Zhu J, Li J, Zhang Z, *et al*. Exploring determinants of health provider choice and

- heterogeneity in preference among outpatients in Beijing: a labelled discrete choice experiment. *BMJ Open* 2019;9(4):e023363.
51. Seghieri C, Mengoni A, Nuti S. Applying discrete choice modelling in a priority setting: an investigation of public preferences for primary care models. *Eur J Health Econ* 2014;15(7):773-85.
52. Ryan M, Skåtun D. Modelling non-demanders in choice experiments. *Health Econ* 2004;13(4):397-402.
53. Veldwijk J, Lambooi MS, Bekker-Grob EWd, *et al*. The effect of including an opt-out option in discrete choice experiments. *PLoS One* 2014;9(11):e111805.
54. Dhar R, Simonson I. The effect of forced choice on choice. *J Mark Res* 2003;40:146 -60.
55. Lu Y, Wang N, Chen Y, *et al*. Health-related quality of life in type-2 diabetes patients: a cross-sectional study in east China. *BMC Endocr Disord* 2017;17(1):1-7.
56. EW dB-G, B D, MF J, *et al*. Sample size requirements for discrete- choice experiments in healthcare: a practical guide. *Patient* 2015;8:373-84.
57. Vanniyasingam T, Cunningham CE, Foster G, *et al*. Simulation study to determine the impact of different design features on design efficiency in discrete choice experiments. *BMJ Open* 2016;6(7):e011985.
58. Johnson R, Orme B. *Sample size issues for conjoint analysis*. In: Orme B, ed. Getting started with conjoint analysis: strategies for product design and pricing research. Madison: Research Publishers 2010:57-66.
59. Manski CF. The structure of random utility models. *Theory Decis* 1977;8(3):229-54.
60. Nieboer AP, Koolman X, Stolk EA. Preferences for long-term care services: willingness to pay estimates derived from a discrete choice experiment. *Soc Sci Med* 2010;70(9):1317-25.
61. Phillips EA, Himmler SF, Schreygg J. Preferences for e-mental health interventions in Germany: a discrete choice experiment. *Value Health* 2021;24(3):421-30.
62. Umar N, Quaiße M, Exley J, *et al*. Toward improving respectful maternity care: a discrete choice experiment with rural women in northeast Nigeria. *BMJ Glob Health* 2020;5(3):e002135.
63. Hauber AB, González JM, Groothuis-Oudshoorn CGM, *et al*. Statistical methods for the analysis of discrete choice experiments: a report of the ISPOR conjoint analysis good research practices task force. *Value Health* 2016;19(4):300-15.
64. Zhang P, Xiong J, Zeng J. Clinical evaluation of active tuberculosis-related deaths in Shenzhen, China: a descriptive study. *Int J Gen Med* 2021;14:237-42.
65. Liang Z, Zhang T, Lin T, *et al*. Health-related quality of life among rural men and women with hypertension: assessment by the EQ-5D-5L in Jiangsu, China. *Qual Life Res* 2019;28(8):2069-80.
66. Roberts MJ, Campbell JL, Abel GA, *et al*. Understanding high and low patient experience scores in primary care: analysis of patients' survey data for general practices and individual doctors. *BMJ* 2014;349:g6034.
67. Matusitz J, Spear J. Effective doctor-patient communication: an updated examination. *Soc Work Public Health* 2014;29(3):252-66.
68. Alfred M, Ubogaya K, Chen X, *et al*. Effectiveness of culturally focused interventions in increasing the satisfaction of hospitalized Asian patients: a systematic review. *JBHI*

- 1  
2  
3  
4  
5  
6  
7  
8  
9  
10  
11  
12  
13  
14  
15  
16  
17  
18  
19  
20  
21  
22  
23  
24  
25  
26  
27  
28  
29  
30  
31  
32  
33  
34  
35  
36  
37  
38  
39  
40  
41  
42  
43  
44  
45  
46  
47  
48  
49  
50  
51  
52  
53  
54  
55  
56  
57  
58  
59  
60
- Database System Rev Implement Rep* 2016;14(8):219-56.
69. Birkeland S, Bismark M, Barry MJ, *et al*. Is greater patient involvement associated with higher satisfaction? experimental evidence from a vignette survey. *BMJ Qual Saf* 2021 doi: 10.1136/bmjqs-2020-012786.
70. Sun J, Lin Q, Zhao P, *et al*. Reducing waiting time and raising outpatient satisfaction in a Chinese public tertiary general hospital-an interrupted time series study. *BMC Public Health* 2017;17(1):668.
71. Roll K, Stargardt T, Schreyögg J. Effect of type of insurance and income on waiting time for outpatient care. *Geneva Pap Risk Insur Issues Pract* 2012;37(4):609-32.
72. Liao R, Liu Y, Peng S, *et al*. Factors affecting health care users' first contact with primary health care facilities in north eastern China, 2008-2018. *BMJ Glob Health* 2021;6(2) doi: 10.1136/bmjgh-2020-003907.
73. Williams SL, Haskard KB, DiMatteo MR. The therapeutic effects of the physician-older patient relationship: effective communication with vulnerable older patients. *Clin Interv Aging* 2007;2(3):453-67.
74. World Health Organization, International Bank for Reconstruction and Development, Organization for Economic Cooperation and Development. *Delivering quality health services: a global imperative for universal health coverage*. Geneva: World Health Organization, 2018:27-39.
75. Li X, Krumholz HM, Yip W, *et al*. Quality of primary health care in China: challenges and recommendations. *Lancet* 2020;395(10239):1802-12.
76. Backman WD, Levine SA, Wenger NK, *et al*. Shared decision-making for older adults with cardiovascular disease. *Clin Cardiol* 2020;43(2):196-204.
77. Liu X, Rohrer W, Luo A, *et al*. Doctor-patient communication skills training in mainland China: a systematic review of the literature. *Patient Educ Couns* 2015;98(1):3-14.

## Appendix 1: Characteristics of the included DCEs

Supplemental Table 1. Characteristics of the included DCEs

| ID                                 | Country             | Setting                                     | Type of diseases                                        | Perspective | Domains      |            |               |             |
|------------------------------------|---------------------|---------------------------------------------|---------------------------------------------------------|-------------|--------------|------------|---------------|-------------|
|                                    |                     |                                             |                                                         |             | Capabilities | Efficiency | Affordability | Convenience |
| Ryan M 2001 <sup>1</sup>           | UK                  | Delivery of healthcare in clinics           | Rheumatology                                            | Patient     | √            | √          | ×             | ×           |
| Ratcliffe J 2002 <sup>2</sup>      | England             | Treatment of asthma                         | Asthma                                                  | Patient     | √            | ×          | √             | ×           |
| Albada A 2009 <sup>3</sup>         | Netherlands         | Choice of ambulatory hospital care centers  | Chronic diseases                                        | Patient     | √            | √          | ×             | ×           |
| Dwight-Johnson M 2010 <sup>4</sup> | US                  | Treatment of depression                     | Depression                                              | Patient     | √            | ×          | √             | ×           |
| Okumura Y 2012 <sup>5</sup>        | Japan               | Treatment of depression                     | Depression                                              | Patient     | √            | ×          | ×             | √           |
| Lathia N 2013 <sup>6</sup>         | Canada              | Outpatient treatment of febrile neutropenia | Non-Hodgkin lymphoma                                    | Patient     | √            | ×          | √             | ×           |
| Whitty JA 2013 <sup>7</sup>        | Australia           | Delivery of disease management programs     | Chronic heart failure                                   | Patient     | √            | ×          | √             | ×           |
| Groenewoud S 2015 <sup>8</sup>     | Netherlands         | Choice of healthcare providers              | Knee arthrosis, Chronic depression, Alzheimer's Disease | Patient     | √            | √          | √             | √           |
| Wong SF 2016 <sup>9</sup>          | Australia           | Health care appointments                    | Cancer                                                  | Patient     | √            | √          | √             | √           |
| O'Hara NN 2016 <sup>10</sup>       | Canada              | Treatment of shoulder osteoarthritis        | Shoulder osteoarthritis                                 | Patient     | √            | √          | √             | √           |
| Kruk ME 2016 <sup>11</sup>         | Ethiopia/Mozambique | Treatment of HIV                            | HIV                                                     | Patient     | √            | ×          | √             | ×           |
| Miners AH 2017 <sup>12</sup>       | England             | Clinic appointments                         | HIV                                                     | Patient     | √            | √          | ×             | ×           |
| Kim WL 2017 <sup>13</sup>          | Korea               | Choice of hospitals                         | Carpal Tunnel Syndrome                                  | Patient     | √            | √          | √             | √           |



|    |                                   |         |                                       |                  |         |   |   |   |   |
|----|-----------------------------------|---------|---------------------------------------|------------------|---------|---|---|---|---|
| 1  |                                   |         |                                       |                  |         |   |   |   |   |
| 2  |                                   |         |                                       |                  |         |   |   |   |   |
| 3  |                                   |         |                                       |                  |         |   |   |   |   |
| 4  |                                   |         |                                       |                  |         |   |   |   |   |
| 5  | Tinelli M 2018 <sup>14</sup>      | Cyprus  | Diabetes care in community            | Diabetes         | Patient | √ | √ | × | × |
| 6  |                                   |         |                                       |                  |         |   |   |   |   |
| 7  | Zanolini A 2018 <sup>15</sup>     | Zambia  | Choice of clinics                     | HIV              | Patient | √ | √ | × | √ |
| 8  | Mishra V 2018 <sup>16</sup>       | India   | Diabetes care in clinics              | Diabetes         | Patient | √ | √ | √ | √ |
| 9  | Mc Morrow L 2018 <sup>17</sup>    | UK      | Diabetes care in clinics              | Diabetes         | Patient | √ | √ | √ | × |
| 10 | Oliver D 2019 <sup>18</sup>       | Canada  | Primary care appointments             | Chronic diseases | Patient | √ | √ | × | × |
| 11 |                                   |         |                                       |                  |         |   |   |   |   |
| 12 |                                   |         |                                       |                  |         |   |   |   |   |
| 13 | Krinke KS 2019 <sup>19</sup>      | Germany | Primary care provision                | Chronic diseases | Patient | √ | × | × | √ |
| 14 | Jia EP 2019 <sup>20</sup>         | China   | Medical service utilization           | Chronic diseases | Patient | √ | × | × | √ |
| 15 |                                   |         |                                       |                  |         |   |   |   |   |
| 16 | Eshun-Wilson I 2019 <sup>21</sup> | Zambia  | Healthcare service delivery model     | HIV              | Patient | √ | √ | × | × |
| 17 |                                   |         |                                       |                  |         |   |   |   |   |
| 18 | Fletcher B 2019 <sup>22</sup>     | UK      | Management of hypertension            | Hypertension     | Patient | √ | × | √ | × |
| 19 |                                   |         |                                       |                  |         |   |   |   |   |
| 20 | Shen X 2019 <sup>23</sup>         | China   | Medical service utilization           | Chronic diseases | Patient | √ | × | √ | √ |
| 21 |                                   |         |                                       |                  |         |   |   |   |   |
| 22 | Peng YY 2019 <sup>24</sup>        | China   | Medical service utilization           | Chronic diseases | Patient | √ | × | × | √ |
| 23 |                                   |         |                                       |                  |         |   |   |   |   |
| 24 | Zhu J 2019 <sup>25</sup>          | China   | Healthcare providers for primary care | Diabetes         | Patient | √ | √ | × | × |
| 25 |                                   |         |                                       |                  |         |   |   |   |   |
| 26 | Zhang H 2019 <sup>26</sup>        | China   | Chronic disease appointments          | Chronic diseases | Patient | √ | × | √ | × |
| 27 |                                   |         |                                       |                  |         |   |   |   |   |
| 28 | Wang X 2019 <sup>27</sup>         | China   | Urban integrated primary care         | Diabetes         | Patient | √ | × | √ | √ |
| 29 |                                   |         |                                       |                  |         |   |   |   |   |
| 30 |                                   |         |                                       |                  |         |   |   |   |   |
| 31 |                                   |         |                                       |                  |         |   |   |   |   |
| 32 |                                   |         |                                       |                  |         |   |   |   |   |

Notes: The included studies were sorted according to the date of publication.

“√” meant that attributes were identified in DCEs, while “×” implied that attributes were not identified in DCEs.

The general term “chronic disease” was used in the type of chronic diseases, due to the specific types remained unclear.

## References

1. Ryan M, Bate A, Eastmond CJ, *et al.* Use of discrete choice experiments to elicit preferences. *Qual Health Care* 2001; 10(1): i55-60.
2. Ratcliffe J, Van Haselen R, Buxton M, *et al.* Assessing patients' preferences for characteristics associated with homeopathic and conventional treatment of asthma: a conjoint analysis study. *Thorax* 2002; 57(6): 503-8.
3. Albada A, Triemstra M. Patients' priorities for ambulatory hospital care centres. A survey and discrete choice experiment among elderly and chronically ill patients of a Dutch hospital. *Health Expect* 2009; 12(1): 92-105.
4. Dwight-Johnson M, Lagomasino IT, Hay J, *et al.* Effectiveness of collaborative care in addressing depression treatment preferences among low-income Latinos. *Psychiatr Serv* 2010; 61(11): 1112-8.
5. Okumura Y, Sakamoto S. Depression treatment preferences among Japanese undergraduates: using conjoint analysis. *Int J Soc Psychiatry* 2012; 58(2): 195-203.
6. Lathia N, Isogai PK, Walker SE, *et al.* Eliciting patients' preferences for outpatient treatment of febrile neutropenia: a discrete choice experiment. *Support Care Cancer* 2013; 21(1): 245-51.
7. Whitty JA, Stewart S, Carrington MJ, *et al.* Patient preferences and willingness-to-pay for a home or clinic based program of chronic heart failure management: findings from the Which? trial. *PLoS One* 2013; 8(3): e58347.
8. Groenewoud S, Exel NJAV, Bobinac A, *et al.* What influences patients' decisions when choosing a health care provider? Measuring preferences of patients with knee arthrosis, chronic depression, or Alzheimer's disease, using discrete choice experiments. *Health Serv Res* 2015; 50(6): 1941-72.
9. Wong SF, Norman R, Dunning TL, *et al.* A discrete choice experiment to examine the preferences of patients with cancer and their willingness to pay for different types of health care appointments. *J Natl Compr Canc Netw* 2016; 14(3): 311-9.
10. O'Hara NN, Slobogean GP, Mohammadi T, *et al.* Are patients willing to pay for total shoulder arthroplasty? Evidence from a discrete choice experiment. *Can J Surg* 2016; 59(2): 107-12.
11. Kruk ME, Riley PL, Palma AM, *et al.* How can the health system retain women in HIV treatment for a lifetime? A discrete choice experiment in Ethiopia and Mozambique. *PLoS One* 2016; 11(8): e0160764.
12. Miners AH, Llewellyn CD, Cooper VL, *et al.* A discrete choice experiment to assess people living with HIV's (PLWHIV's) preferences for GP or HIV clinic appointments. *Sex Transm Infect* 2017; 93(2): 105-11.
13. Kim WL, Kim JS, Lee JB, *et al.* Survey of preferences in patients scheduled for carpal tunnel release using conjoint analysis. *Clin Orthop Surg* 2017; 9(1): 96-100.
14. Tinelli M, Petrou P, Samoutis G, *et al.* Improving quality care for diabetes in the community: What do Cypriot patients want? *Int J Qual Health Care* 2018; 30(6): 443-9.



15. Zanolini A, Sikombe K, Sikazwe I, *et al.* Understanding preferences for HIV care and treatment in Zambia: Evidence from a discrete choice experiment among patients who have been lost to follow-up. *PLoS Med* 2018; 15(8): e1002636.
16. Mishra V, Samuel C, Sharma SK. Patient's utility for various attributes of diabetes care services. *IIM Kozhikode Soci & Mana Review* 2019; 8(1): 1-9.
17. Mc Morrow L, MC OH, Hynes L, *et al.* The preferences of young adults with type 1 diabetes at clinics using a discrete choice experiment approach: the D1 Now study. *Diabet Med* 2018; 35(12): 1686-92.
18. Oliver D, Deal K, Howard M, *et al.* Patient trade-offs between continuity and access in primary care interprofessional teaching clinics in Canada: a cross-sectional survey using discrete choice experiment. *BMJ Open* 2019; 9(3): e023578.
19. Krinke KS, Tangermann U, Amelung VE, *et al.* Public preferences for primary care provision in Germany - a discrete choice experiment. *BMC Fam Pract* 2019; 20(1): 80.
20. Jia EP, Xiong JY, Li XL, *et al.* Study on medical service utilization preferences of patients with chronic diseases in communities of Wuhan city from the perspective of mixed logit model. *Medicine and Society* 2019; 32(8): 58-60,79.
21. Eshun-Wilson I, Mukumbwa-Mwenechanya M, Kim HY, *et al.* Differentiated care preferences of stable patients on antiretroviral therapy in Zambia: a discrete choice experiment. *J Acquir Immune Defic Syndr* 2019; 81(5): 540-6.
22. Fletcher B, Hinton L, McManus R, Rivero-Arias O. Patient preferences for management of high blood pressure in the UK: a discrete choice experiment. *Br J Gen Pract* 2019;69(686): e629-37.
23. Shen X, Xiong JY, Jiang MZ, *et al.* Treatment preferences of residents assumed to have severe chronic diseases in China based on discrete choice experiment. *Chinese Health Economics* 2019; 38(8): 68-71.
24. Peng YY, Xiong JY, Li XL, *et al.* Study on medical service utilization preference of urban elderly chronic patients based on discrete choice experiment. *Chinese Journal of Health Policy* 2019; 12(9): 54-9.
25. Zhu J, Li J, Zhang Z, *et al.* Patients' choice and preference for common disease diagnosis and diabetes care: a discrete choice experiment. *Int J Health Plann Manage* 2019; 34(4): e1544-55.
26. Zhang H, Xiong JY, Su Y. Preference for health service utilization among community chronic disease patients. *Chin J Public Health* 2019; 35(11): 1544-8.
27. Wang X, Song K, Zhu P, *et al.* How do type 2 diabetes patients value urban integrated primary care in China? Results of a discrete choice experiment. *Int J Environ Res Public Health* 2019; 17(1):117.

## Appendix 2: Domains and attributes in the included DCEs

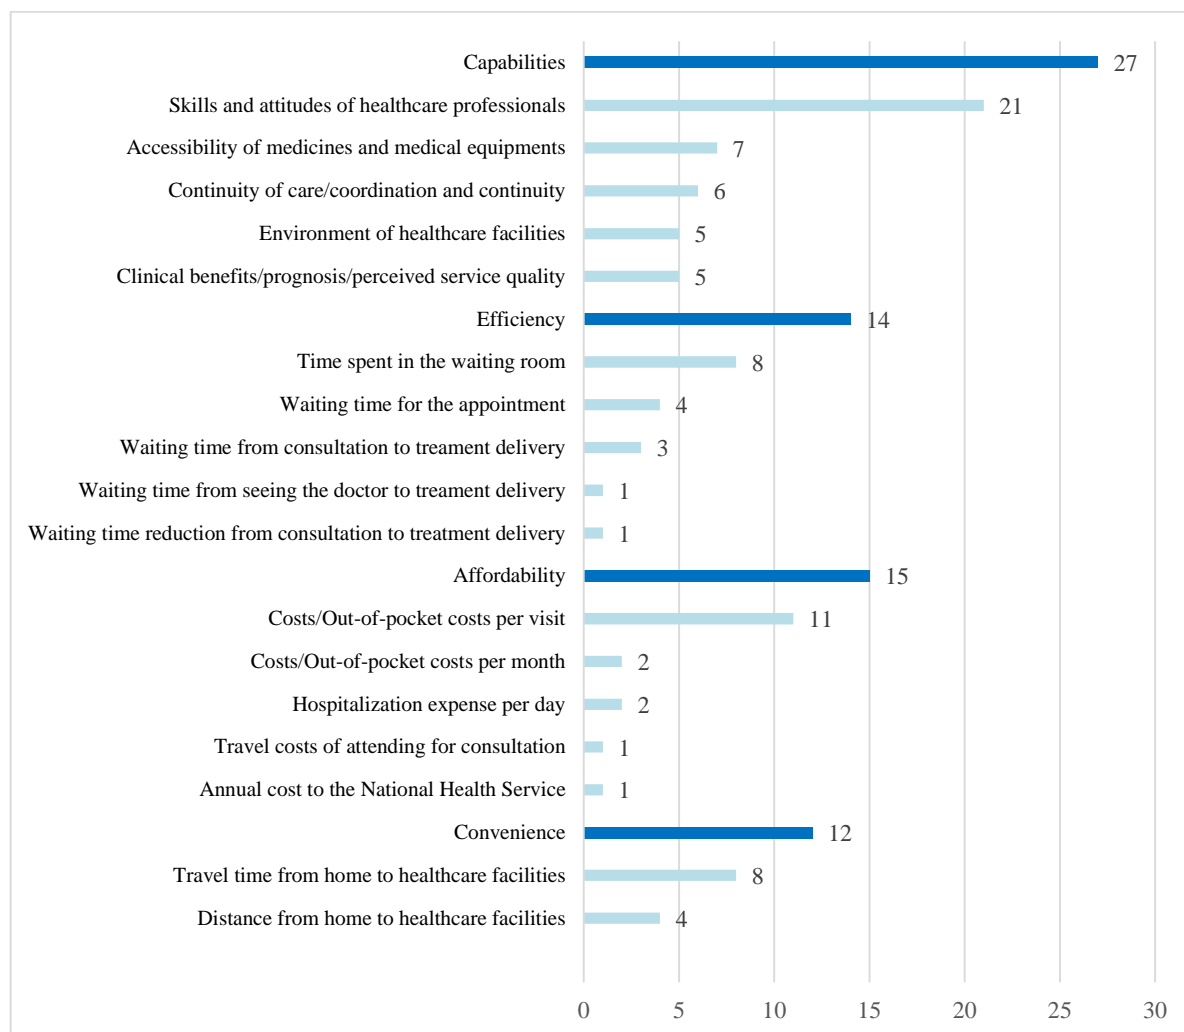

Supplemental Figure 1. Domains and attributes in the included DCEs

- Domains of the attributes
- Each attribute in the domains.

Notes: Numbers represent for numbers of literatures that mentioned the relevant domains or attributes. Several literatures had more than one attribute in the same domain. Physician-patient communication was included in the attribute “skills and attitudes of healthcare professionals”.

### Appendix 3: Explanations to attributes and levels

Investigators were required to convey the following definitions to patients:

- Treatment effects: ‘Good treatment effects’ means that the ideal treatment goals set out in the evidence-based guidelines for individual patients can be achieved, and your complications disappear; ‘Moderate treatment effects’ suggests that although the blood pressure is almost to the ideal treatment goals, the complications still exist; ‘Poor treatment effects’ implies that both blood pressure and complications are not well controlled.
- ‘Physician-patient communication’ refers to the communication between the physician and the patient. ‘Good’ suggests that the physician always treats patients with respect, listens carefully when the patient is explaining, and engages the patient in clinical decision-making; ‘Moderate’ implies that the physician sometimes treats patients with respect, and sometimes feels boring and becomes impolite; listening to patients explaining, but not likely to involve the patient in clinical decision-making; ‘Poor’ indicates that attitude of the physician is impatient and impolite, never engages the patient in clinical decision-making.
- ‘Continuity of care’ suggests that the healthcare facility operates in a well-functioning integrated care delivery system, which can provide coordinated healthcare services for chronic disease patients, i.e. the appropriate care and care management is perceived to occur at the right time and in the right order.
- ‘Waiting time’ is the amount of time for patients seeking care at the healthcare facility before being attended for physician consultation, i.e. the time from registration to seeing a physician.
- ‘Travel time’ refers to the time it takes for the patient to drive from home to the healthcare facility (one way). In our study, the travel time is measured by taking a taxi or private car.
- The cost is defined as the out-of-pocket costs per visit if reimbursed, including the direct medical costs when accessing care. Those who participate in public health insurance programs may be eligible to receive reimbursement which contributes to reducing the out-of-pocket costs.

### Appendix 4: Examples of DCE choice sets

Suppose you have poor blood pressure control, which results in uncomfortable symptoms like dizziness, headache, palpitation, chest pain, shortness of breath, nausea. If you can only choose one type of healthcare service for your first-contact visit, which one would you prefer? Please think carefully and make a trade-off.

| Attributes                          | Type A                                                                                                 | Type B                                                                                                   |
|-------------------------------------|--------------------------------------------------------------------------------------------------------|----------------------------------------------------------------------------------------------------------|
| Treatment effects                   | <br>Moderate          | <br>Poor              |
| Out-of-pocket costs (if reimbursed) | <br>CNY 300 per visit | <br>CNY 150 per visit |
| Physician-patient communication     | <br>Poor             | <br>Moderate         |
| Continuity of care                  | <br>Yes             | <br>No              |
| Waiting time                        | <br>Within 0.5 hour | <br>2 hours         |
| Travel time                         | <br>3 hours         | <br>Within 1 hour   |
| Your choice                         | <input type="checkbox"/>                                                                               | <input type="checkbox"/>                                                                                 |

1  
2  
3 Here are the descriptions of the sampling choice sets.  
4

5 If you follow the doctor's advice in healthcare facility A, although your blood  
6 pressure will be controlled to the ideal treatment goals, severe clinical syndromes and  
7 complications still exist. The out-of-pocket cost for your first-contact care in  
8 healthcare facility A is CNY 300 per visit. The attitude of the doctor is impatient and  
9 doesn't allow you to express your own opinions. However, healthcare facility A would  
10 provide you with continuous and coordinated healthcare services. You need to wait for  
11 0.5 hours in the waiting room to see the doctor. It will take you 3 hours to travel from  
12 your home to healthcare facility A by car or taxi.  
13  
14  
15  
16  
17  
18

19 If you follow the doctor's advice in healthcare facility B, both blood pressure and  
20 complications will not be controlled at a satisfactory level. However, the  
21 out-of-pocket cost for your first-contact care in healthcare facility B is CNY only 150  
22 per visit. The doctor may ask you for your own experience of getting the disease and  
23 allow you to express your own ideas, but not likely to make decisions according to  
24 your preference and opinions. Healthcare facility B would not provide you with  
25 continuous and coordinated healthcare services. You need to wait for 2 hours in the  
26 waiting room to see the doctor. It will take you less than 1 hour to travel from your  
27 home to healthcare facility B by car or taxi.  
28  
29  
30  
31  
32  
33  
34  
35  
36  
37  
38  
39  
40  
41  
42  
43  
44  
45  
46  
47  
48  
49  
50  
51  
52  
53  
54  
55  
56  
57  
58  
59  
60

## Appendix 5: Evaluation of patients' understanding and confidence in DCE choices

1. Do you feel difficult or easy to understand the DCE scenarios and choice sets?

Please select the level from zero to 10 and give a tick '√' in the score to reflect your understanding:

0: extremely difficult

10: extremely easy

0 1 2 3 4 5 6 7 8 9 10

👎 → 👍

2. Are you confident in your choice of healthcare services? Please select the level from zero to 10 and give a tick '√' in the score to represent your confidence:

0: not confident at all

10: extremely confident

0 1 2 3 4 5 6 7 8 9 10

👎 → 👍

## Appendix 6: Number of patients in the sampled healthcare facilities

Supplemental Table 2. Number of patients in the sampled healthcare facilities (N=703)

| Name of hospitals and health centers      | City/District* | Province | Grade <sup>#</sup> | Number of patients |
|-------------------------------------------|----------------|----------|--------------------|--------------------|
| Affiliated Hospital of Nantong University | Nantong        | Jiangsu  | 3                  | 249                |
| Tongzhou No.3 People's Hospital           | Nantong        | Jiangsu  | 2                  | 30                 |
| Rudong Yangkou Hospital                   | Nantong        | Jiangsu  | 1                  | 90                 |
| Chongchuan Fumin Health Center            | Nantong        | Jiangsu  | 1                  | 29                 |
| Xiangshui People's Hospital               | Yancheng       | Jiangsu  | 2                  | 113                |
| Dongtai People's Hospital                 | Yancheng       | Jiangsu  | 2                  | 45                 |
| Donghai People's Hospital                 | Lianyungang    | Jiangsu  | 2                  | 59                 |
| Pujiang Community Health Service Center   | Pujiang        | Shanghai | 1                  | 58                 |
| Zhuanqiao Community Health Service Center | Minhang        | Shanghai | 1                  | 30                 |

Notes: \*Districts in Shanghai municipality.

<sup>#</sup>In China, hospitals are divided into three grades, tertiary, secondary, and primary, with tertiary hospitals being the highest grade. The primary healthcare facilities consist of community health service centers or stations, which are located in urban areas, and township healthcare centers, which are located in rural areas. A secondary hospital is similar to a regional hospital. A tertiary hospital is a comprehensive, referral hospital at the city, provincial or national level, with at least 500 hospital beds that are able to provide advanced and specialized medical services.

## Appendix 7: Types of comorbidities in the patients

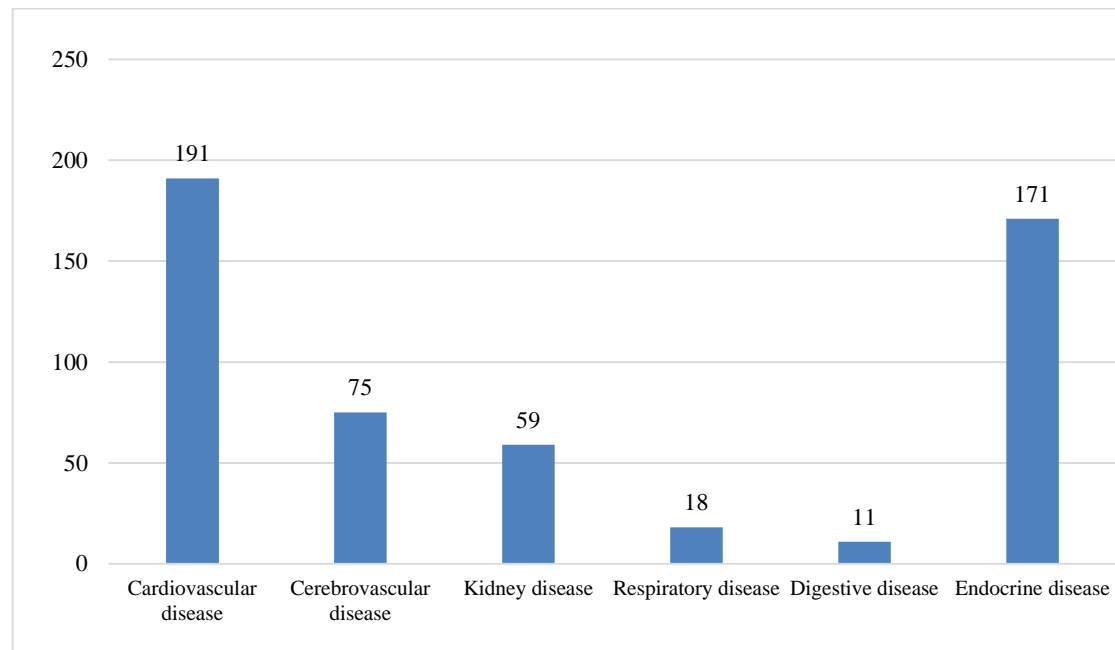

Supplemental Figure 2. Number of patients with comorbidities



## Appendix 8: Sensitivity analysis of the mixed logit model

Supplemental Table 3. Estimates of the mixed logit model for patients in Jiangsu province (N=615)

| Attributes                                           | Mean (SE)                     | SD (SE)                       |
|------------------------------------------------------|-------------------------------|-------------------------------|
| <b>Treatment effects</b>                             |                               |                               |
| <i>Poor(ref)</i>                                     | -5.137 <sup>***</sup> (0.465) |                               |
| <i>Moderate</i>                                      | -0.137 (0.104)                | -0.889 <sup>***</sup> (0.196) |
| <i>Good</i>                                          | 5.273 <sup>***</sup> (0.475)  | 2.708 <sup>***</sup> (0.283)  |
| <b>Physician-patient communication</b>               |                               |                               |
| <i>Poor(ref)</i>                                     | -0.881 <sup>***</sup> (0.115) |                               |
| <i>Moderate</i>                                      | 0.003 (0.068)                 | -0.073 (0.157)                |
| <i>Good</i>                                          | 0.878 <sup>***</sup> (0.107)  | 0.471 <sup>***</sup> (0.128)  |
| <b>Continuity of care</b>                            |                               |                               |
| <i>No(ref)</i>                                       | 0.368 <sup>***</sup> (0.059)  |                               |
| <i>Yes</i>                                           | 0.368 <sup>***</sup> (0.059)  | 0.471 <sup>***</sup> (0.110)  |
| <b>Waiting time</b>                                  |                               |                               |
| <i>4 hours or longer (ref)</i>                       | -0.526 <sup>***</sup> (0.087) |                               |
| <i>2 hours</i>                                       | 0.090 (0.075)                 | 0.323 <sup>*</sup> (0.153)    |
| <i>Within 0.5 hour</i>                               | 0.436 <sup>***</sup> (0.073)  | 0.316 (0.169)                 |
| <b>Travel time</b>                                   |                               |                               |
| <i>6 hours or longer (ref)</i>                       | -1.707 <sup>***</sup> (0.156) |                               |
| <i>3 hours</i>                                       | 0.302 <sup>***</sup> (0.076)  | 0.574 <sup>***</sup> (0.137)  |
| <i>Within 1 hour</i>                                 | 1.405 <sup>***</sup> (0.128)  | 0.935 <sup>***</sup> (0.123)  |
| <b>Out-of-pocket costs per visit (if reimbursed)</b> |                               |                               |
| Cost (per CNY50)                                     | -0.191 <sup>***</sup> (0.024) | 0.240 <sup>***</sup> (0.036)  |
| Log likelihood                                       | -1959.9002                    |                               |
| Observations                                         | 9840                          |                               |

Notes: Ref, reference; SE, standard error; SD, standard deviation; HRQoL, Health-related quality of life; CNY, Chinese yuan.

\* p<0.05; \*\* p<0.01; \*\*\* p<0.001

## Appendix 9: Results of the interaction effects

Supplemental Table 4. Model estimation of the interaction effects between attributes and patients' characteristics

| Attributes                                           | Model 1               |       | Model 2               |       | Model 3               |       | Model 4               |       | Model 5               |       |
|------------------------------------------------------|-----------------------|-------|-----------------------|-------|-----------------------|-------|-----------------------|-------|-----------------------|-------|
|                                                      | Mean                  | SE    |
| <b>Treatment effects</b>                             |                       |       |                       |       |                       |       |                       |       |                       |       |
| <i>Poor(ref)</i>                                     | -4.874 <sup>***</sup> | 0.466 | -3.352 <sup>***</sup> | 0.302 | -4.319 <sup>***</sup> | 0.439 | -3.894 <sup>***</sup> | 0.365 | -4.340 <sup>***</sup> | 0.429 |
| <i>Moderate</i>                                      | 0.059                 | 0.155 | -0.091                | 0.110 | -0.018                | 0.133 | -0.234 <sup>*</sup>   | 0.118 | -0.180                | 0.122 |
| <i>Good</i>                                          | 4.816 <sup>***</sup>  | 0.452 | 3.443 <sup>***</sup>  | 0.308 | 4.337 <sup>***</sup>  | 0.438 | 4.128 <sup>***</sup>  | 0.378 | 4.520 <sup>***</sup>  | 0.440 |
| <b>Physician-patient communication</b>               |                       |       |                       |       |                       |       |                       |       |                       |       |
| <i>Poor(ref)</i>                                     | -0.692 <sup>***</sup> | 0.130 | -0.542 <sup>***</sup> | 0.104 | -0.659 <sup>***</sup> | 0.120 | -0.772 <sup>***</sup> | 0.116 | -0.780 <sup>***</sup> | 0.122 |
| <i>Moderate</i>                                      | 0.038                 | 0.098 | -0.102                | 0.080 | -0.021                | 0.087 | 0.019                 | 0.083 | -0.045                | 0.082 |
| <i>Good</i>                                          | 0.654 <sup>***</sup>  | 0.121 | 0.644 <sup>***</sup>  | 0.097 | 0.680 <sup>***</sup>  | 0.110 | 0.752 <sup>***</sup>  | 0.107 | 0.824 <sup>***</sup>  | 0.113 |
| <b>Continuity of care</b>                            |                       |       |                       |       |                       |       |                       |       |                       |       |
| <i>No(ref)</i>                                       | -0.248 <sup>***</sup> | 0.075 | -0.236 <sup>***</sup> | 0.058 | -0.190 <sup>**</sup>  | 0.065 | -0.313 <sup>***</sup> | 0.063 | -0.408 <sup>***</sup> | 0.067 |
| <i>Yes</i>                                           | 0.248 <sup>***</sup>  | 0.075 | 0.236 <sup>***</sup>  | 0.058 | 0.190 <sup>**</sup>   | 0.065 | 0.313 <sup>***</sup>  | 0.063 | 0.408 <sup>***</sup>  | 0.067 |
| <b>Waiting time</b>                                  |                       |       |                       |       |                       |       |                       |       |                       |       |
| <i>4 hours or longer(ref)</i>                        | -0.375 <sup>***</sup> | 0.114 | 0.469 <sup>***</sup>  | 0.090 | -0.439 <sup>***</sup> | 0.104 | -0.434 <sup>***</sup> | 0.095 | -0.538 <sup>***</sup> | 0.098 |
| <i>2 hours</i>                                       | 0.109                 | 0.106 | 0.008                 | 0.085 | -0.029                | 0.093 | 0.116                 | 0.086 | 0.0004                | 0.085 |
| <i>Within 0.5 hour</i>                               | 0.266 <sup>**</sup>   | 0.096 | 0.461 <sup>***</sup>  | 0.082 | 0.468 <sup>***</sup>  | 0.096 | 0.318 <sup>***</sup>  | 0.082 | 0.537 <sup>***</sup>  | 0.087 |
| <b>Travel time</b>                                   |                       |       |                       |       |                       |       |                       |       |                       |       |
| <i>6 hours or longer(ref)</i>                        | -1.763 <sup>***</sup> | 0.175 | -1.259 <sup>***</sup> | 0.127 | -1.204 <sup>***</sup> | 0.137 | -1.451 <sup>***</sup> | 0.139 | -1.727 <sup>***</sup> | 0.170 |
| <i>3 hours</i>                                       | 0.253 <sup>*</sup>    | 0.103 | 0.159 <sup>*</sup>    | 0.080 | 0.136                 | 0.087 | 0.206 <sup>*</sup>    | 0.084 | 0.249 <sup>**</sup>   | 0.082 |
| <i>Within 1 hour</i>                                 | 1.510 <sup>***</sup>  | 0.154 | 1.100 <sup>***</sup>  | 0.114 | 1.068 <sup>***</sup>  | 0.123 | 1.245 <sup>***</sup>  | 0.122 | 1.477 <sup>***</sup>  | 0.150 |
| <b>Out-of-pocket costs per visit (if reimbursed)</b> |                       |       |                       |       |                       |       |                       |       |                       |       |
| Cost (per CNY50)                                     | -0.202 <sup>***</sup> | 0.031 | -0.167 <sup>***</sup> | 0.025 | -0.153 <sup>***</sup> | 0.028 | -0.168 <sup>***</sup> | 0.024 | -0.199 <sup>***</sup> | 0.028 |

1  
2  
3  
4  
5  
6  
7  
8  
9  
10  
11  
12  
13  
14  
15  
16  
17  
18  
19  
20  
21  
22  
23  
24  
25  
26  
27  
28  
29  
30  
31  
32  
33  
34  
35  
36  
37  
38  
39  
40  
41  
42  
43  
44  
45  
46

| Interactions with demographics                       | Income     |       | Age        |       | Comorbidities |       | Type of healthcare facilities |       | EQ-5D-5L index value |       |
|------------------------------------------------------|------------|-------|------------|-------|---------------|-------|-------------------------------|-------|----------------------|-------|
| <b>Treatment effects</b>                             |            |       |            |       |               |       |                               |       |                      |       |
| <i>Moderate</i>                                      | -0.455*    | 0.204 | -0.334     | 0.188 | -0.348        | 0.191 | 0.056                         | 0.180 | -0.081               | 0.205 |
| <i>Good</i>                                          | 0.406      | 0.275 | 2.839***   | 0.801 | 0.986*        | 0.442 | 0.898*                        | 0.452 | 1.748**              | 0.612 |
| <b>Physician-patient communication</b>               |            |       |            |       |               |       |                               |       |                      |       |
| <i>Moderate</i>                                      | -0.201     | 0.128 | 0.133      | 0.126 | -0.070        | 0.130 | -0.156                        | 0.121 | 0.021                | 0.139 |
| <i>Good</i>                                          | 0.377*     | 0.154 | 0.442*     | 0.183 | 0.272         | 0.155 | 0.102                         | 0.149 | 0.171                | 0.178 |
| <b>Continuity of care</b>                            |            |       |            |       |               |       |                               |       |                      |       |
| <i>Yes</i>                                           | 0.185      | 0.101 | 0.232*     | 0.102 | 0.318**       | 0.108 | 0.045                         | 0.093 | -0.130               | 0.110 |
| <b>Waiting time</b>                                  |            |       |            |       |               |       |                               |       |                      |       |
| <i>2 hours</i>                                       | -0.137     | 0.139 | 0.017      | 0.136 | 0.143         | 0.136 | -0.193                        | 0.128 | 0.006                | 0.152 |
| <i>Within 0.5 hour</i>                               | 0.396**    | 0.134 | 0.044      | 0.130 | 0.023         | 0.135 | 0.315*                        | 0.132 | -0.002               | 0.143 |
| <b>Travel time</b>                                   |            |       |            |       |               |       |                               |       |                      |       |
| <i>3 hours</i>                                       | -0.075     | 0.132 | 0.111      | 0.125 | 0.158         | 0.131 | -0.012                        | 0.125 | -0.039               | 0.133 |
| <i>within 1 hour</i>                                 | -0.121     | 0.159 | 0.533**    | 0.189 | 0.588**       | 0.176 | 0.144                         | 0.170 | -0.034               | 0.202 |
| <b>Out-of-pocket costs per visit (if reimbursed)</b> |            |       |            |       |               |       |                               |       |                      |       |
| Cost (per CNY50)                                     | 0.010      | 0.038 | -0.017     | 0.039 | -0.068        | 0.039 | -0.015                        | 0.037 | 0.002                | 0.042 |
| Log likelihood                                       | -2271.4592 |       | -2283.4658 |       | -2278.9024    |       | -2289.7129                    |       | -2280.1412           |       |
| Participants                                         | 703        |       | 703        |       | 703           |       | 703                           |       | 703                  |       |
| Observations                                         | 11248      |       | 11248      |       | 11248         |       | 11248                         |       | 11248                |       |

Notes: Ref, reference. Monthly household income: CNY 4000 or less=0, Higher than CNY 4000=1; Age: Young or middle-aged (aged 64 or younger)=0, Elderly (aged 65 or older)=1; Comorbidities: No comorbidities=0, With comorbidities=1; The most frequently visited healthcare facilities: Community health centers=0, Secondary or tertiary hospitals=1; EQ-5D-5L index value: 0.85 and below=0, Higher than 0.85=1.

\* p<0.05; \*\* p<0.01; \*\*\* p<0.001

**STROBE 2007 (v4) checklist of items to be included in reports of observational studies in epidemiology\***  
**Checklist for cohort, case-control, and cross-sectional studies (combined)**

| Section/Topic             | Item # | Recommendation                                                                                                                                                                                                                                                                                                                                                                                                                                                         | Reported on page #                                                |
|---------------------------|--------|------------------------------------------------------------------------------------------------------------------------------------------------------------------------------------------------------------------------------------------------------------------------------------------------------------------------------------------------------------------------------------------------------------------------------------------------------------------------|-------------------------------------------------------------------|
| Title and abstract        | 1      | (a) Indicate the study's design with a commonly used term in the title or the abstract                                                                                                                                                                                                                                                                                                                                                                                 | Page 2                                                            |
|                           |        | (b) Provide in the abstract an informative and balanced summary of what was done and what was found                                                                                                                                                                                                                                                                                                                                                                    | Page 3                                                            |
| <b>Introduction</b>       |        |                                                                                                                                                                                                                                                                                                                                                                                                                                                                        |                                                                   |
| Background/rationale      | 2      | Explain the scientific background and rationale for the investigation being reported                                                                                                                                                                                                                                                                                                                                                                                   | Page 5<br>Page 6 (line 3-44)                                      |
| Objectives                | 3      | State specific objectives, including any pre-specified hypotheses                                                                                                                                                                                                                                                                                                                                                                                                      | Page 6 (line 45-60)                                               |
| <b>Methods</b>            |        |                                                                                                                                                                                                                                                                                                                                                                                                                                                                        |                                                                   |
| Study design              | 4      | Present key elements of study design early in the paper                                                                                                                                                                                                                                                                                                                                                                                                                | Page 7 (line 10-14)<br>Page 9 (line 23-59)<br>Page 10 (line 4-25) |
| Setting                   | 5      | Describe the setting, locations, and relevant dates, including periods of recruitment, exposure, follow-up, and data collection                                                                                                                                                                                                                                                                                                                                        | Page 10 (line 50-59)<br>Appendix 6                                |
| Participants              | 6      | (a) <i>Cohort study</i> —Give the eligibility criteria, and the sources and methods of selection of participants. Describe methods of follow-up<br><i>Case-control study</i> —Give the eligibility criteria, and the sources and methods of case ascertainment and control selection. Give the rationale for the choice of cases and controls<br><i>Cross-sectional study</i> —Give the eligibility criteria, and the sources and methods of selection of participants | Page 10 (line 59-60)<br>Page 11 (line 4-6)                        |
|                           |        | (b) <i>Cohort study</i> —For matched studies, give matching criteria and number of exposed and unexposed<br><i>Case-control study</i> —For matched studies, give matching criteria and the number of controls per case                                                                                                                                                                                                                                                 | Not applicable                                                    |
| Variables                 | 7      | Clearly define all outcomes, exposures, predictors, potential confounders, and effect modifiers. Give diagnostic criteria, if applicable                                                                                                                                                                                                                                                                                                                               | Page 7 (line 14-60)<br>Page 8<br>Page 9 (line 4-21)               |
| Data sources/ measurement | 8*     | For each variable of interest, give sources of data and details of methods of assessment (measurement). Describe comparability of assessment methods if there is more than one group                                                                                                                                                                                                                                                                                   | Page 10 (line 4-21)<br>Page 11 (line 26-39)                       |
| Bias                      | 9      | Describe any efforts to address potential sources of bias                                                                                                                                                                                                                                                                                                                                                                                                              | Page 10 (line 22-26)<br>Page 11 (line 8-24)                       |
| Study size                | 10     | Explain how the study size was arrived at                                                                                                                                                                                                                                                                                                                                                                                                                              | Page 10 (line 28-45)                                              |
| Quantitative variables    | 11     | Explain how quantitative variables were handled in the analyses. If applicable, describe which groupings were chosen and why                                                                                                                                                                                                                                                                                                                                           | Page 12 (line 4-37)                                               |

|                     |     |                                                                                                                                                                                                                                                                                                           |                                                                         |
|---------------------|-----|-----------------------------------------------------------------------------------------------------------------------------------------------------------------------------------------------------------------------------------------------------------------------------------------------------------|-------------------------------------------------------------------------|
|                     |     |                                                                                                                                                                                                                                                                                                           | Page 13 (line 16-46)                                                    |
| Statistical methods | 12  | (a) Describe all statistical methods, including those used to control for confounding                                                                                                                                                                                                                     | Page 12 (line 39-51)                                                    |
|                     |     | (b) Describe any methods used to examine subgroups and interactions                                                                                                                                                                                                                                       | Page 12 (line 53-59)<br>Page 13 (line 4-14)                             |
|                     |     | (c) Explain how missing data were addressed                                                                                                                                                                                                                                                               | Page 11 (line 14-24)                                                    |
|                     |     | (d) <i>Cohort study</i> —If applicable, explain how loss to follow-up was addressed<br><i>Case-control study</i> —If applicable, explain how matching of cases and controls was addressed<br><i>Cross-sectional study</i> —If applicable, describe analytical methods taking account of sampling strategy | Not applicable                                                          |
|                     |     | (e) Describe any sensitivity analyses                                                                                                                                                                                                                                                                     | Page 12 (line 53-60)<br>Page 13 (line 4-14)<br>Page 16 (line 10-14)     |
| <b>Results</b>      |     |                                                                                                                                                                                                                                                                                                           |                                                                         |
| Participants        | 13* | (a) Report numbers of individuals at each stage of study—eg numbers potentially eligible, examined for eligibility, confirmed eligible, included in the study, completing follow-up, and analysed                                                                                                         | Page 13 (line 54-59)<br>Page 14 (line 4-8)                              |
|                     |     | (b) Give reasons for non-participation at each stage                                                                                                                                                                                                                                                      | Not applicable                                                          |
|                     |     | (c) Consider use of a flow diagram                                                                                                                                                                                                                                                                        | Not applicable                                                          |
| Descriptive data    | 14* | (a) Give characteristics of study participants (eg demographic, clinical, social) and information on exposures and potential confounders                                                                                                                                                                  | Page 14 (line 16-60)<br>Page 15 (line 3-48)                             |
|                     |     | (b) Indicate number of participants with missing data for each variable of interest                                                                                                                                                                                                                       | Not applicable                                                          |
|                     |     | (c) <i>Cohort study</i> —Summarise follow-up time (eg, average and total amount)                                                                                                                                                                                                                          | Not applicable                                                          |
| Outcome data        | 15* | <i>Cohort study</i> —Report numbers of outcome events or summary measures over time                                                                                                                                                                                                                       |                                                                         |
|                     |     | <i>Case-control study</i> —Report numbers in each exposure category, or summary measures of exposure                                                                                                                                                                                                      |                                                                         |
|                     |     | <i>Cross-sectional study</i> —Report numbers of outcome events or summary measures                                                                                                                                                                                                                        | Page 15 (line 53-60)<br>Page 16 (line 4-14)                             |
| Main results        | 16  | (a) Give unadjusted estimates and, if applicable, confounder-adjusted estimates and their precision (eg, 95% confidence interval). Make clear which confounders were adjusted for and why they were included                                                                                              | Page 16 (line 15-59)<br>Page 17 (line 4-46)                             |
|                     |     | (b) Report category boundaries when continuous variables were categorized                                                                                                                                                                                                                                 | Not applicable                                                          |
|                     |     | (c) If relevant, consider translating estimates of relative risk into absolute risk for a meaningful time period                                                                                                                                                                                          | Not applicable                                                          |
| Other analyses      | 17  | Report other analyses done—eg analyses of subgroups and interactions, and sensitivity analyses                                                                                                                                                                                                            | Page 17 (line 48-60)<br>Page 18 (line 4-40)<br>Appendix 8<br>Appendix 9 |

|                          |    |                                                                                                                                                                            |                                                        |
|--------------------------|----|----------------------------------------------------------------------------------------------------------------------------------------------------------------------------|--------------------------------------------------------|
| <b>Discussion</b>        |    |                                                                                                                                                                            |                                                        |
| Key results              | 18 | Summarise key results with reference to study objectives                                                                                                                   | Page 18 (line 45-60)<br>Page 19<br>Page 20 (line 4-30) |
| Limitations              | 19 | Discuss limitations of the study, taking into account sources of potential bias or imprecision. Discuss both direction and magnitude of any potential bias                 | Page 22 (line 41-60)<br>Page 23 (line 3-14)            |
| Interpretation           | 20 | Give a cautious overall interpretation of results considering objectives, limitations, multiplicity of analyses, results from similar studies, and other relevant evidence | Page 20 (line 35-60)<br>Page 21 (line 4-12)            |
| Generalisability         | 21 | Discuss the generalisability (external validity) of the study results                                                                                                      | Page 21 (line 14-60)<br>Page 22 (line 4-6)             |
| <b>Other information</b> |    |                                                                                                                                                                            |                                                        |
| Funding                  | 22 | Give the source of funding and the role of the funders for the present study and, if applicable, for the original study on which the present article is based              | Page 24 (line 28-44)                                   |

\*Give information separately for cases and controls in case-control studies and, if applicable, for exposed and unexposed groups in cohort and cross-sectional studies.

**Note:** An Explanation and Elaboration article discusses each checklist item and gives methodological background and published examples of transparent reporting. The STROBE checklist is best used in conjunction with this article (freely available on the Web sites of PLoS Medicine at <http://www.plosmedicine.org/>, Annals of Internal Medicine at <http://www.annals.org/>, and Epidemiology at <http://www.epidem.com/>). Information on the STROBE Initiative is available at [www.strobe-statement.org](http://www.strobe-statement.org).
