# Supplementary material for: Preferences for healthcare services among hypertension patients in China: a discrete choice experiment
Source: PubMed Central journal article supplement — BMJ Open. 2021 Dec 6;11(12):e053270. doi: 10.1136/bmjopen-2021-053270 (PMC8655589; doi:10.1136/bmjopen-2021-053270), 2021-12-06
Supplement: bmjopen-2021-053270supp001.pdf [file bmjopen-2021-053270supp001.pdf]

## Appendix 1: Characteristics of the included DCEs

Supplemental Table 1. Characteristics of the included DCEs

| ID                                 | Country             | Setting                                     | Type of diseases                                        | Perspective | Domains      |            |               |             |
|------------------------------------|---------------------|---------------------------------------------|---------------------------------------------------------|-------------|--------------|------------|---------------|-------------|
|                                    |                     |                                             |                                                         |             | Capabilities | Efficiency | Affordability | Convenience |
| Ryan M 2001 <sup>1</sup>           | UK                  | Delivery of healthcare in clinics           | Rheumatology                                            | Patient     | √            | √          | ×             | ×           |
| Ratcliffe J 2002 <sup>2</sup>      | England             | Treatment of asthma                         | Asthma                                                  | Patient     | √            | ×          | √             | ×           |
| Albada A 2009 <sup>3</sup>         | Netherlands         | Choice of ambulatory hospital care centers  | Chronic diseases                                        | Patient     | √            | √          | ×             | ×           |
| Dwight-Johnson M 2010 <sup>4</sup> | US                  | Treatment of depression                     | Depression                                              | Patient     | √            | ×          | √             | ×           |
| Okumura Y 2012 <sup>5</sup>        | Japan               | Treatment of depression                     | Depression                                              | Patient     | √            | ×          | ×             | √           |
| Lathia N 2013 <sup>6</sup>         | Canada              | Outpatient treatment of febrile neutropenia | Non-Hodgkin lymphoma                                    | Patient     | √            | ×          | √             | ×           |
| Whitty JA 2013 <sup>7</sup>        | Australia           | Delivery of disease management programs     | Chronic heart failure                                   | Patient     | √            | ×          | √             | ×           |
| Groenewoud S 2015 <sup>8</sup>     | Netherlands         | Choice of healthcare providers              | Knee arthrosis, Chronic depression, Alzheimer's Disease | Patient     | √            | √          | √             | √           |
| Wong SF 2016 <sup>9</sup>          | Australia           | Health care appointments                    | Cancer                                                  | Patient     | √            | √          | √             | √           |
| O'Hara NN 2016 <sup>10</sup>       | Canada              | Treatment of shoulder osteoarthritis        | Shoulder osteoarthritis                                 | Patient     | √            | √          | √             | √           |
| Kruk ME 2016 <sup>11</sup>         | Ethiopia/Mozambique | Treatment of HIV                            | HIV                                                     | Patient     | √            | ×          | √             | ×           |
| Miners AH 2017 <sup>12</sup>       | England             | Clinic appointments                         | HIV                                                     | Patient     | √            | √          | ×             | ×           |
| Kim WL 2017 <sup>13</sup>          | Korea               | Choice of hospitals                         | Carpal Tunnel Syndrome                                  | Patient     | √            | √          | √             | √           |

|                                   |         |                                       |                  |         |   |   |   |   |
|-----------------------------------|---------|---------------------------------------|------------------|---------|---|---|---|---|
| Tinelli M 2018 <sup>14</sup>      | Cyprus  | Diabetes care in community            | Diabetes         | Patient | √ | √ | × | × |
| Zanolini A 2018 <sup>15</sup>     | Zambia  | Choice of clinics                     | HIV              | Patient | √ | √ | × | √ |
| Mishra V 2018 <sup>16</sup>       | India   | Diabetes care in clinics              | Diabetes         | Patient | √ | √ | √ | √ |
| Mc Morrow L 2018 <sup>17</sup>    | UK      | Diabetes care in clinics              | Diabetes         | Patient | √ | √ | √ | × |
| Oliver D 2019 <sup>18</sup>       | Canada  | Primary care appointments             | Chronic diseases | Patient | √ | √ | × | × |
| Krinke KS 2019 <sup>19</sup>      | Germany | Primary care provision                | Chronic diseases | Patient | √ | × | × | √ |
| Jia EP 2019 <sup>20</sup>         | China   | Medical service utilization           | Chronic diseases | Patient | √ | × | × | √ |
| Eshun-Wilson I 2019 <sup>21</sup> | Zambia  | Healthcare service delivery model     | HIV              | Patient | √ | √ | × | × |
| Fletcher B 2019 <sup>22</sup>     | UK      | Management of hypertension            | Hypertension     | Patient | √ | × | √ | × |
| Shen X 2019 <sup>23</sup>         | China   | Medical service utilization           | Chronic diseases | Patient | √ | × | √ | √ |
| Peng YY 2019 <sup>24</sup>        | China   | Medical service utilization           | Chronic diseases | Patient | √ | × | × | √ |
| Zhu J 2019 <sup>25</sup>          | China   | Healthcare providers for primary care | Diabetes         | Patient | √ | √ | × | × |
| Zhang H 2019 <sup>26</sup>        | China   | Chronic disease appointments          | Chronic diseases | Patient | √ | × | √ | × |
| Wang X 2019 <sup>27</sup>         | China   | Urban integrated primary care         | Diabetes         | Patient | √ | × | √ | √ |

Notes: The included studies were sorted according to the date of publication.

“√” meant that attributes were identified in DCEs, while “×” implied that attributes were not identified in DCEs.

The general term “chronic disease” was used in the type of chronic diseases, due to the specific types remained unclear.

## References

1. Ryan M, Bate A, Eastmond CJ, *et al.* Use of discrete choice experiments to elicit preferences. *Qual Health Care* 2001; 10(1): i55-60.
2. Ratcliffe J, Van Haselen R, Buxton M, *et al.* Assessing patients' preferences for characteristics associated with homeopathic and conventional treatment of asthma: a conjoint analysis study. *Thorax* 2002; 57(6): 503-8.
3. Albada A, Triemstra M. Patients' priorities for ambulatory hospital care centres. A survey and discrete choice experiment among elderly and chronically ill patients of a Dutch hospital. *Health Expect* 2009; 12(1): 92-105.
4. Dwight-Johnson M, Lagomasino IT, Hay J, *et al.* Effectiveness of collaborative care in addressing depression treatment preferences among low-income Latinos. *Psychiatr Serv* 2010; 61(11): 1112-8.
5. Okumura Y, Sakamoto S. Depression treatment preferences among Japanese undergraduates: using conjoint analysis. *Int J Soc Psychiatry* 2012; 58(2): 195-203.
6. Lathia N, Isogai PK, Walker SE, *et al.* Eliciting patients' preferences for outpatient treatment of febrile neutropenia: a discrete choice experiment. *Support Care Cancer* 2013; 21(1): 245-51.
7. Whitty JA, Stewart S, Carrington MJ, *et al.* Patient preferences and willingness-to-pay for a home or clinic based program of chronic heart failure management: findings from the Which? trial. *PLoS One* 2013; 8(3): e58347.
8. Groenewoud S, Exel NJAV, Bobinac A, *et al.* What influences patients' decisions when choosing a health care provider? Measuring preferences of patients with knee arthrosis, chronic depression, or Alzheimer's disease, using discrete choice experiments. *Health Serv Res* 2015; 50(6): 1941-72.
9. Wong SF, Norman R, Dunning TL, *et al.* A discrete choice experiment to examine the preferences of patients with cancer and their willingness to pay for different types of health care appointments. *J Natl Compr Canc Netw* 2016; 14(3): 311-9.
10. O'Hara NN, Slobogean GP, Mohammadi T, *et al.* Are patients willing to pay for total shoulder arthroplasty? Evidence from a discrete choice experiment. *Can J Surg* 2016; 59(2): 107-12.
11. Kruk ME, Riley PL, Palma AM, *et al.* How can the health system retain women in HIV treatment for a lifetime? A discrete choice experiment in Ethiopia and Mozambique. *PLoS One* 2016; 11(8): e0160764.
12. Miners AH, Llewellyn CD, Cooper VL, *et al.* A discrete choice experiment to assess people living with HIV's (PLWHIV's) preferences for GP or HIV clinic appointments. *Sex Transm Infect* 2017; 93(2): 105-11.
13. Kim WL, Kim JS, Lee JB, *et al.* Survey of preferences in patients scheduled for carpal tunnel release using conjoint analysis. *Clin Orthop Surg* 2017; 9(1): 96-100.
14. Tinelli M, Petrou P, Samoutis G, *et al.* Improving quality care for diabetes in the community: What do Cypriot patients want? *Int J Qual Health Care* 2018; 30(6): 443-9.

15. Zanolini A, Sikombe K, Sikazwe I, *et al.* Understanding preferences for HIV care and treatment in Zambia: Evidence from a discrete choice experiment among patients who have been lost to follow-up. *PLoS Med* 2018; 15(8): e1002636.
16. Mishra V, Samuel C, Sharma SK. Patient's utility for various attributes of diabetes care services. *IIM Kozhikode Soci & Mana Review* 2019; 8(1): 1-9.
17. Mc Morrow L, MC OH, Hynes L, *et al.* The preferences of young adults with type 1 diabetes at clinics using a discrete choice experiment approach: the D1 Now study. *Diabet Med* 2018; 35(12): 1686-92.
18. Oliver D, Deal K, Howard M, *et al.* Patient trade-offs between continuity and access in primary care interprofessional teaching clinics in Canada: a cross-sectional survey using discrete choice experiment. *BMJ Open* 2019; 9(3): e023578.
19. Krinke KS, Tangermann U, Amelung VE, *et al.* Public preferences for primary care provision in Germany - a discrete choice experiment. *BMC Fam Pract* 2019; 20(1): 80.
20. Jia EP, Xiong JY, Li XL, *et al.* Study on medical service utilization preferences of patients with chronic diseases in communities of Wuhan city from the perspective of mixed logit model. *Medicine and Society* 2019; 32(8): 58-60,79.
21. Eshun-Wilson I, Mukumbwa-Mwenechanya M, Kim HY, *et al.* Differentiated care preferences of stable patients on antiretroviral therapy in Zambia: a discrete choice experiment. *J Acquir Immune Defic Syndr* 2019; 81(5): 540-6.
22. Fletcher B, Hinton L, McManus R, Rivero-Arias O. Patient preferences for management of high blood pressure in the UK: a discrete choice experiment. *Br J Gen Pract* 2019;69(686): e629-37.
23. Shen X, Xiong JY, Jiang MZ, *et al.* Treatment preferences of residents assumed to have severe chronic diseases in China based on discrete choice experiment. *Chinese Health Economics* 2019; 38(8): 68-71.
24. Peng YY, Xiong JY, Li XL, *et al.* Study on medical service utilization preference of urban elderly chronic patients based on discrete choice experiment. *Chinese Journal of Health Policy* 2019; 12(9): 54-9.
25. Zhu J, Li J, Zhang Z, *et al.* Patients' choice and preference for common disease diagnosis and diabetes care: a discrete choice experiment. *Int J Health Plann Manage* 2019; 34(4): e1544-55.
26. Zhang H, Xiong JY, Su Y. Preference for health service utilization among community chronic disease patients. *Chin J Public Health* 2019; 35(11): 1544-8.
27. Wang X, Song K, Zhu P, *et al.* How do type 2 diabetes patients value urban integrated primary care in China? Results of a discrete choice experiment. *Int J Environ Res Public Health* 2019; 17(1):117.

## Appendix 2: Domains and attributes in the included DCEs

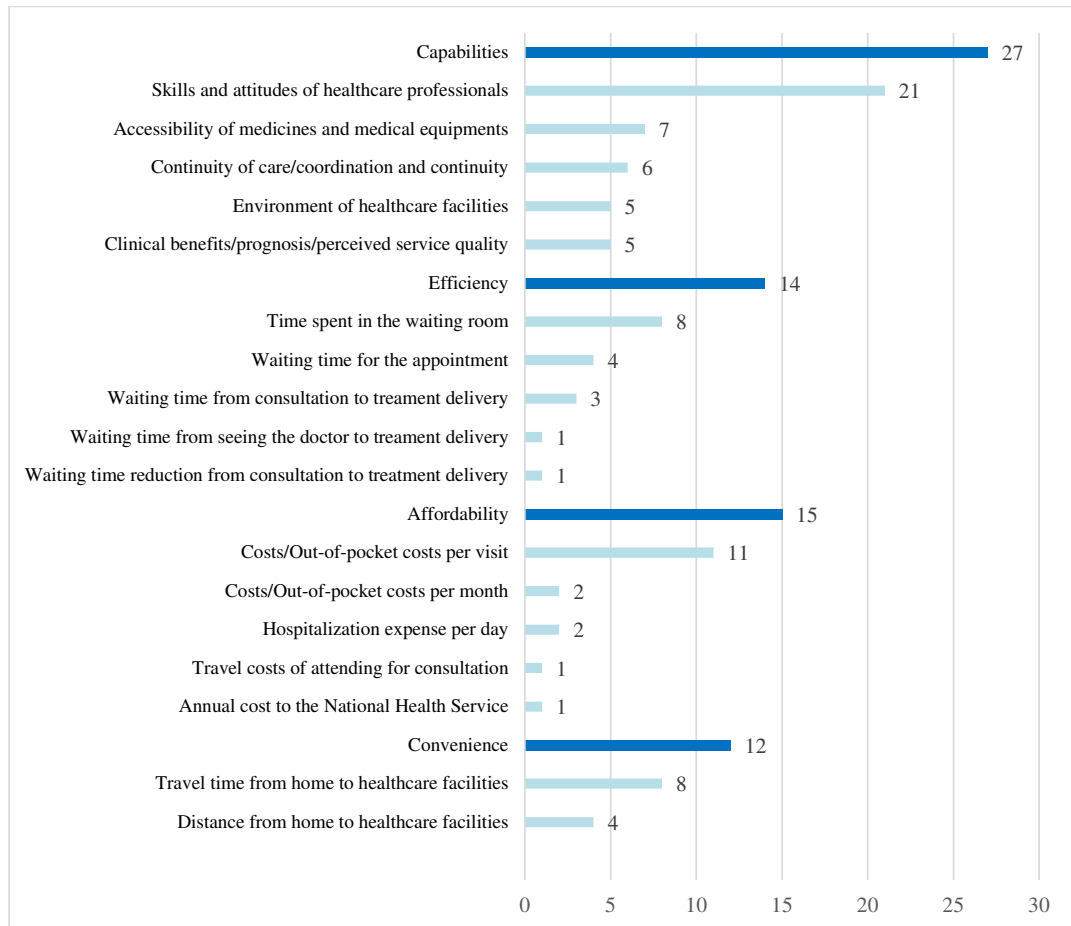

Supplemental Figure 1. Domains and attributes in the included DCEs

- Domains of the attributes
- Each attribute in the domains.

Notes: Numbers represent for numbers of literatures that mentioned the relevant domains or attributes. Several literatures had more than one attribute in the same domain. Physician-patient communication was included in the attribute “skills and attitudes of healthcare professionals”.

### Appendix 3: Explanations to attributes and levels

Investigators were required to convey the following definitions to patients:

- Treatment effects: ‘Good treatment effects’ means that the ideal treatment goals set out in the evidence-based guidelines for individual patients can be achieved, and your complications disappear; ‘Moderate treatment effects’ suggests that although the blood pressure is almost to the ideal treatment goals, the complications still exist; ‘Poor treatment effects’ implies that both blood pressure and complications are not well controlled.
- ‘Physician-patient communication’ refers to the communication between the physician and the patient. ‘Good’ suggests that the physician always treats patients with respect, listens carefully when the patient is explaining, and engages the patient in clinical decision-making; ‘Moderate’ implies that the physician sometimes treats patients with respect, and sometimes feels boring and becomes impolite; listening to patients explaining, but not likely to involve the patient in clinical decision-making; ‘Poor’ indicates that attitude of the physician is impatient and impolite, never engages the patient in clinical decision-making.
- ‘Continuity of care’ suggests that the healthcare facility operates in a well-functioning integrated care delivery system, which can provide coordinated healthcare services for chronic disease patients, i.e. the appropriate care and care management is perceived to occur at the right time and in the right order.
- ‘Waiting time’ is the amount of time for patients seeking care at the healthcare facility before being attended for physician consultation, i.e. the time from registration to seeing a physician.
- ‘Travel time’ refers to the time it takes for the patient to drive from home to the healthcare facility (one way). In our study, the travel time is measured by taking a taxi or private car.
- The cost is defined as the out-of-pocket costs per visit if reimbursed, including the direct medical costs when accessing care. Those who participate in public health insurance programs may be eligible to receive reimbursement which contributes to reducing the out-of-pocket costs.

#### Appendix 4: Examples of DCE choice sets

Suppose you have poor blood pressure control, which results in uncomfortable symptoms like dizziness, headache, palpitation, chest pain, shortness of breath, nausea. If you can only choose one type of healthcare service for your first-contact visit, which one would you prefer? Please think carefully and make a trade-off.

| Attributes                          | Type A                                                                                                 | Type B                                                                                                   |
|-------------------------------------|--------------------------------------------------------------------------------------------------------|----------------------------------------------------------------------------------------------------------|
| Treatment effects                   | <br>Moderate          | <br>Poor              |
| Out-of-pocket costs (if reimbursed) | <br>CNY 300 per visit | <br>CNY 150 per visit |
| Physician-patient communication     | <br>Poor            | <br>Moderate         |
| Continuity of care                  | <br>Yes             | <br>No              |
| Waiting time                        | <br>Within 0.5 hour | <br>2 hours         |
| Travel time                         | <br>3 hours         | <br>Within 1 hour   |
| Your choice                         | <input type="checkbox"/>                                                                               | <input type="checkbox"/>                                                                                 |

Here are the descriptions of the sampling choice sets.

If you follow the doctor's advice in healthcare facility A, although your blood pressure will be controlled to the ideal treatment goals, severe clinical syndromes and complications still exist. The out-of-pocket cost for your first-contact care in healthcare facility A is CNY 300 per visit. The attitude of the doctor is impatient and doesn't allow you to express your own opinions. However, healthcare facility A would provide you with continuous and coordinated healthcare services. You need to wait for 0.5 hours in the waiting room to see the doctor. It will take you 3 hours to travel from your home to healthcare facility A by car or taxi.

If you follow the doctor's advice in healthcare facility B, both blood pressure and complications will not be controlled at a satisfactory level. However, the out-of-pocket cost for your first-contact care in healthcare facility B is CNY only 150 per visit. The doctor may ask you for your own experience of getting the disease and allow you to express your own ideas, but not likely to make decisions according to your preference and opinions. Healthcare facility B would not provide you with continuous and coordinated healthcare services. You need to wait for 2 hours in the waiting room to see the doctor. It will take you less than 1 hour to travel from your home to healthcare facility B by car or taxi.



## Appendix 5: Evaluation of patients' understanding and confidence in DCE choices

1. Do you feel difficult or easy to understand the DCE scenarios and choice sets?

Please select the level from zero to 10 and give a tick '√' in the score to reflect your understanding:

0: extremely difficult

10: extremely easy

0 1 2 3 4 5 6 7 8 9 10

 

A horizontal scale from 0 to 10. Above the scale, a box on the left contains '0: extremely difficult' and a box on the right contains '10: extremely easy'. Below the scale, a thumbs-down icon is at 0 and a thumbs-up icon is at 10. A horizontal arrow points from the thumbs-down icon to the thumbs-up icon.

2. Are you confident in your choice of healthcare services? Please select the level from zero to 10 and give a tick '√' in the score to represent your confidence:

0: not confident at all

10: extremely confident

0 1 2 3 4 5 6 7 8 9 10

 

A horizontal scale from 0 to 10. Above the scale, a box on the left contains '0: not confident at all' and a box on the right contains '10: extremely confident'. Below the scale, a thumbs-down icon is at 0 and a thumbs-up icon is at 10. A horizontal arrow points from the thumbs-down icon to the thumbs-up icon.

## Appendix 6: Number of patients in the sampled healthcare facilities

Supplemental Table 2. Number of patients in the sampled healthcare facilities (N=703)

| Name of hospitals and health centers      | City/District * | Province | Grade <sup>#</sup> | Number of patients |
|-------------------------------------------|-----------------|----------|--------------------|--------------------|
| Affiliated Hospital of Nantong University | Nantong         | Jiangsu  | 3                  | 249                |
| Tongzhou No.3 People's Hospital           | Nantong         | Jiangsu  | 2                  | 30                 |
| Rudong Yangkou Hospital                   | Nantong         | Jiangsu  | 1                  | 90                 |
| Chongchuan Fumin Health Center            | Nantong         | Jiangsu  | 1                  | 29                 |
| Xiangshui People's Hospital               | Yancheng        | Jiangsu  | 2                  | 113                |
| Dongtai People's Hospital                 | Yancheng        | Jiangsu  | 2                  | 45                 |
| Donghai People's Hospital                 | Lianyungang     | Jiangsu  | 2                  | 59                 |
| Pujiang Community Health Service Center   | Pujiang         | Shanghai | 1                  | 58                 |
| Zhuanqiao Community Health Service Center | Minhang         | Shanghai | 1                  | 30                 |

Notes: \*Districts in Shanghai municipality.

<sup>#</sup>In China, hospitals are divided into three grades, tertiary, secondary, and primary, with tertiary hospitals being the highest grade. The primary healthcare facilities consist of community health service centers or stations, which are located in urban areas, and township healthcare centers, which are located in rural areas. A secondary hospital is similar to a regional hospital. A tertiary hospital is a comprehensive, referral hospital at the city, provincial or national level, with at least 500 hospital beds that are able to provide advanced and specialized medical services.

## Appendix 7: Types of comorbidities in the patients

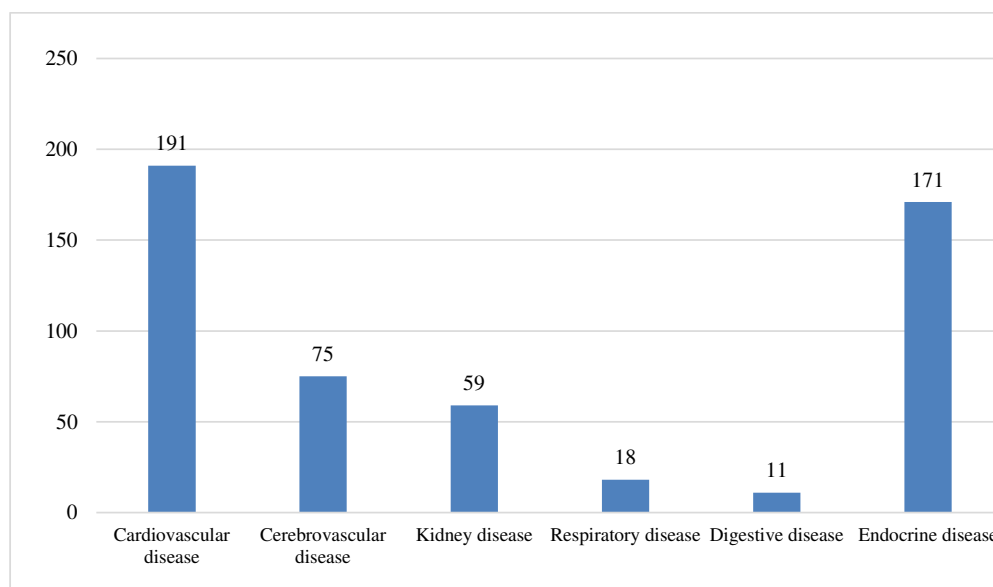

Supplemental Figure 2. Number of patients with comorbidities

## Appendix 8: Sensitivity analysis of the mixed logit model

Supplemental Table 3. Estimates of the mixed logit model for patients in Jiangsu province (N=615)

| Attributes                                           | Mean (SE)                     | SD (SE)                       |
|------------------------------------------------------|-------------------------------|-------------------------------|
| <b>Treatment effects</b>                             |                               |                               |
| <i>Poor(ref)</i>                                     | -5.137 <sup>***</sup> (0.465) |                               |
| <i>Moderate</i>                                      | -0.137 (0.104)                | -0.889 <sup>***</sup> (0.196) |
| <i>Good</i>                                          | 5.273 <sup>***</sup> (0.475)  | 2.708 <sup>***</sup> (0.283)  |
| <b>Physician-patient communication</b>               |                               |                               |
| <i>Poor(ref)</i>                                     | -0.881 <sup>***</sup> (0.115) |                               |
| <i>Moderate</i>                                      | 0.003 (0.068)                 | -0.073 (0.157)                |
| <i>Good</i>                                          | 0.878 <sup>***</sup> (0.107)  | 0.471 <sup>***</sup> (0.128)  |
| <b>Continuity of care</b>                            |                               |                               |
| <i>No(ref)</i>                                       | 0.368 <sup>***</sup> (0.059)  |                               |
| <i>Yes</i>                                           | 0.368 <sup>***</sup> (0.059)  | 0.471 <sup>***</sup> (0.110)  |
| <b>Waiting time</b>                                  |                               |                               |
| <i>4 hours or longer (ref)</i>                       | -0.526 <sup>***</sup> (0.087) |                               |
| <i>2 hours</i>                                       | 0.090 (0.075)                 | 0.323 <sup>*</sup> (0.153)    |
| <i>Within 0.5 hour</i>                               | 0.436 <sup>***</sup> (0.073)  | 0.316 (0.169)                 |
| <b>Travel time</b>                                   |                               |                               |
| <i>6 hours or longer (ref)</i>                       | -1.707 <sup>***</sup> (0.156) |                               |
| <i>3 hours</i>                                       | 0.302 <sup>***</sup> (0.076)  | 0.574 <sup>***</sup> (0.137)  |
| <i>Within 1 hour</i>                                 | 1.405 <sup>***</sup> (0.128)  | 0.935 <sup>***</sup> (0.123)  |
| <b>Out-of-pocket costs per visit (if reimbursed)</b> |                               |                               |
| Cost (per CNY50)                                     | -0.191 <sup>***</sup> (0.024) | 0.240 <sup>***</sup> (0.036)  |
| Log likelihood                                       | -1959.9002                    |                               |
| Observations                                         | 9840                          |                               |

Notes: Ref, reference; SE, standard error; SD, standard deviation; HRQoL, Health-related quality of life; CNY, Chinese yuan.

\* p<0.05; \*\* p<0.01; \*\*\* p<0.001

## Appendix 9: Results of the interaction effects

Supplemental Table 4. Model estimation of the interaction effects between attributes and patients' characteristics

| Attributes                                           | Model 1               |       | Model 2               |       | Model 3               |       | Model 4               |       | Model 5               |       |
|------------------------------------------------------|-----------------------|-------|-----------------------|-------|-----------------------|-------|-----------------------|-------|-----------------------|-------|
|                                                      | Mean                  | SE    |
| <b>Treatment effects</b>                             |                       |       |                       |       |                       |       |                       |       |                       |       |
| <i>Poor(ref)</i>                                     | -4.874 <sup>***</sup> | 0.466 | -3.352 <sup>***</sup> | 0.302 | -4.319 <sup>***</sup> | 0.439 | -3.894 <sup>***</sup> | 0.365 | -4.340 <sup>***</sup> | 0.429 |
| <i>Moderate</i>                                      | 0.059                 | 0.155 | -0.091                | 0.110 | -0.018                | 0.133 | -0.234 <sup>*</sup>   | 0.118 | -0.180                | 0.122 |
| <i>Good</i>                                          | 4.816 <sup>***</sup>  | 0.452 | 3.443 <sup>***</sup>  | 0.308 | 4.337 <sup>***</sup>  | 0.438 | 4.128 <sup>***</sup>  | 0.378 | 4.520 <sup>***</sup>  | 0.440 |
| <b>Physician-patient communication</b>               |                       |       |                       |       |                       |       |                       |       |                       |       |
| <i>Poor(ref)</i>                                     | -0.692 <sup>***</sup> | 0.130 | -0.542 <sup>***</sup> | 0.104 | -0.659 <sup>***</sup> | 0.120 | -0.772 <sup>***</sup> | 0.116 | -0.780 <sup>***</sup> | 0.122 |
| <i>Moderate</i>                                      | 0.038                 | 0.098 | -0.102                | 0.080 | -0.021                | 0.087 | 0.019                 | 0.083 | -0.045                | 0.082 |
| <i>Good</i>                                          | 0.654 <sup>***</sup>  | 0.121 | 0.644 <sup>***</sup>  | 0.097 | 0.680 <sup>***</sup>  | 0.110 | 0.752 <sup>***</sup>  | 0.107 | 0.824 <sup>***</sup>  | 0.113 |
| <b>Continuity of care</b>                            |                       |       |                       |       |                       |       |                       |       |                       |       |
| <i>No(ref)</i>                                       | -0.248 <sup>***</sup> | 0.075 | -0.236 <sup>***</sup> | 0.058 | -0.190 <sup>**</sup>  | 0.065 | -0.313 <sup>***</sup> | 0.063 | -0.408 <sup>***</sup> | 0.067 |
| <i>Yes</i>                                           | 0.248 <sup>***</sup>  | 0.075 | 0.236 <sup>***</sup>  | 0.058 | 0.190 <sup>**</sup>   | 0.065 | 0.313 <sup>***</sup>  | 0.063 | 0.408 <sup>***</sup>  | 0.067 |
| <b>Waiting time</b>                                  |                       |       |                       |       |                       |       |                       |       |                       |       |
| <i>4 hours or longer(ref)</i>                        | -0.375 <sup>***</sup> | 0.114 | 0.469 <sup>***</sup>  | 0.090 | -0.439 <sup>***</sup> | 0.104 | -0.434 <sup>***</sup> | 0.095 | -0.538 <sup>***</sup> | 0.098 |
| <i>2 hours</i>                                       | 0.109                 | 0.106 | 0.008                 | 0.085 | -0.029                | 0.093 | 0.116                 | 0.086 | 0.0004                | 0.085 |
| <i>Within 0.5 hour</i>                               | 0.266 <sup>**</sup>   | 0.096 | 0.461 <sup>***</sup>  | 0.082 | 0.468 <sup>***</sup>  | 0.096 | 0.318 <sup>***</sup>  | 0.082 | 0.537 <sup>***</sup>  | 0.087 |
| <b>Travel time</b>                                   |                       |       |                       |       |                       |       |                       |       |                       |       |
| <i>6 hours or longer(ref)</i>                        | -1.763 <sup>***</sup> | 0.175 | -1.259 <sup>***</sup> | 0.127 | -1.204 <sup>***</sup> | 0.137 | -1.451 <sup>***</sup> | 0.139 | -1.727 <sup>***</sup> | 0.170 |
| <i>3 hours</i>                                       | 0.253 <sup>*</sup>    | 0.103 | 0.159 <sup>*</sup>    | 0.080 | 0.136                 | 0.087 | 0.206 <sup>*</sup>    | 0.084 | 0.249 <sup>**</sup>   | 0.082 |
| <i>Within 1 hour</i>                                 | 1.510 <sup>***</sup>  | 0.154 | 1.100 <sup>***</sup>  | 0.114 | 1.068 <sup>***</sup>  | 0.123 | 1.245 <sup>***</sup>  | 0.122 | 1.477 <sup>***</sup>  | 0.150 |
| <b>Out-of-pocket costs per visit (if reimbursed)</b> |                       |       |                       |       |                       |       |                       |       |                       |       |
| Cost (per CNY50)                                     | -0.202 <sup>***</sup> | 0.031 | -0.167 <sup>***</sup> | 0.025 | -0.153 <sup>***</sup> | 0.028 | -0.168 <sup>***</sup> | 0.024 | -0.199 <sup>***</sup> | 0.028 |

| Interactions with demographics                | Income     |       | Age        |       | Comorbidities |       | Type of healthcare facilities |       | EQ-5D-5L index value |       |
|-----------------------------------------------|------------|-------|------------|-------|---------------|-------|-------------------------------|-------|----------------------|-------|
| Treatment effects                             |            |       |            |       |               |       |                               |       |                      |       |
| <i>Moderate</i>                               | -0.455*    | 0.204 | -0.334     | 0.188 | -0.348        | 0.191 | 0.056                         | 0.180 | -0.081               | 0.205 |
| <i>Good</i>                                   | 0.406      | 0.275 | 2.839***   | 0.801 | 0.986*        | 0.442 | 0.898*                        | 0.452 | 1.748**              | 0.612 |
| Physician-patient communication               |            |       |            |       |               |       |                               |       |                      |       |
| <i>Moderate</i>                               | -0.201     | 0.128 | 0.133      | 0.126 | -0.070        | 0.130 | -0.156                        | 0.121 | 0.021                | 0.139 |
| <i>Good</i>                                   | 0.377*     | 0.154 | 0.442*     | 0.183 | 0.272         | 0.155 | 0.102                         | 0.149 | 0.171                | 0.178 |
| Continuity of care                            |            |       |            |       |               |       |                               |       |                      |       |
| <i>Yes</i>                                    | 0.185      | 0.101 | 0.232*     | 0.102 | 0.318**       | 0.108 | 0.045                         | 0.093 | -0.130               | 0.110 |
| Waiting time                                  |            |       |            |       |               |       |                               |       |                      |       |
| <i>2 hours</i>                                | -0.137     | 0.139 | 0.017      | 0.136 | 0.143         | 0.136 | -0.193                        | 0.128 | 0.006                | 0.152 |
| <i>Within 0.5 hour</i>                        | 0.396**    | 0.134 | 0.044      | 0.130 | 0.023         | 0.135 | 0.315*                        | 0.132 | -0.002               | 0.143 |
| Travel time                                   |            |       |            |       |               |       |                               |       |                      |       |
| <i>3 hours</i>                                | -0.075     | 0.132 | 0.111      | 0.125 | 0.158         | 0.131 | -0.012                        | 0.125 | -0.039               | 0.133 |
| <i>within 1 hour</i>                          | -0.121     | 0.159 | 0.533**    | 0.189 | 0.588**       | 0.176 | 0.144                         | 0.170 | -0.034               | 0.202 |
| Out-of-pocket costs per visit (if reimbursed) |            |       |            |       |               |       |                               |       |                      |       |
| Cost (per CNY50)                              | 0.010      | 0.038 | -0.017     | 0.039 | -0.068        | 0.039 | -0.015                        | 0.037 | 0.002                | 0.042 |
| Log likelihood                                | -2271.4592 |       | -2283.4658 |       | -2278.9024    |       | -2289.7129                    |       | -2280.1412           |       |
| Participants                                  | 703        |       | 703        |       | 703           |       | 703                           |       | 703                  |       |
| Observations                                  | 11248      |       | 11248      |       | 11248         |       | 11248                         |       | 11248                |       |

Notes: Ref, reference. Monthly household income: CNY 4000 or less=0, Higher than CNY 4000=1; Age: Young or middle-aged (aged 64 or younger)=0, Elderly (aged 65 or older)=1; Comorbidities: No comorbidities=0, With comorbidities=1; The most frequently visited healthcare facilities: Community health centers=0, Secondary or tertiary hospitals=1; EQ-5D-5L index value: 0.85 and below=0, Higher than 0.85=1.

\*p<0.05; \*\*p<0.01; \*\*\*p<0.001
